1 **Membrane transporter dimerization driven by differential lipid solvation energetics**  
2 **of dissociated and associated states**

3  
4 Running title: Differential lipid solvation drives CLC-ec1 dimerization.

5  
6 Rahul Chadda<sup>1\*</sup>, Nathan Bernhardt<sup>3\*</sup>, Elizabeth G. Kelley<sup>4</sup>, Susana C. M. Teixeira<sup>4,5</sup>, Kacie Griffith,  
7 Alejandro Gil-Ley<sup>2,3</sup>, Tuğba N. Öztürk<sup>1</sup>, Lauren E. Hughes<sup>2</sup>, Ana Forsythe<sup>2</sup>, Venkatramanan  
8 Krishnamani<sup>2</sup>, José D. Faraldo-Gómez<sup>3#</sup> and Janice L. Robertson<sup>1#</sup>

9  
10 \*equal contribution

11 #corresponding authors

12  
13 <sup>1</sup>Biochemistry and Molecular Biophysics, Washington University School of Medicine, St. Louis, MO  
14 63110

15 <sup>2</sup>Molecular Physiology and Biophysics, Carver College of Medicine, The University of Iowa, Iowa City,  
16 IA 52242

17 <sup>3</sup>Theoretical Molecular Biophysics Laboratory, National Heart, Lung and Blood Institute, National  
18 Institutes of Health, Bethesda MD 20892

19 <sup>4</sup>Center for Neutron Research, National Institute for Standards and Technology, Gaithersburg, MD 20899

20 <sup>5</sup>Center for Neutron Science, Chemical and Biomolecular Engineering, University of Delaware, Newark  
21 DE 19716

22  
23 **IMPACT STATEMENT**

24 Differences in the lipid solvation energetics of associated and dissociated states is a primary driving  
25 force for membrane protein oligomerization, presenting a molecular mechanism for lipid regulation in  
26 biology.

27  
28  
29  
30

31 **ABSTRACT**

32

33 Over two-thirds of integral membrane proteins of known structure assemble into oligomers. Yet, the forces  
34 that drive the association of these proteins remain to be delineated, as the lipid bilayer is a solvent  
35 environment that is both structurally and chemically complex. In this study we reveal how the lipid solvent  
36 defines the dimerization equilibrium of the CLC-ec1 Cl<sup>-</sup>/H<sup>+</sup> antiporter. Integrating experimental and  
37 computational approaches, we show that monomers associate to avoid a thinned-membrane defect caused  
38 by their exposed dimerization interfaces. In this defect, lipids are strongly tilted and less densely packed  
39 than in the bulk, with a larger degree of entanglement between opposing leaflets and greater water  
40 penetration into the bilayer interior. Dimerization restores the membrane to a near-native state and  
41 therefore, appears to be driven by the larger free-energy cost of lipid solvation of the dissociated  
42 protomers. Supporting this theory, we demonstrate that addition of short-chain lipids strongly shifts the  
43 dimerization equilibrium towards the monomeric state, and show that the cause of this effect is that these  
44 lipids preferentially solvate the defect. Importantly, we show that this shift requires only minimal  
45 quantities of short-chain lipids, with no measurable impact on either the macroscopic physical state of the  
46 membrane or the protein's biological function. Based on these observations, we posit that free-energy  
47 differentials for local lipid solvation define membrane-protein association equilibria. With this, we argue  
48 that preferential lipid solvation is a plausible cellular mechanism for lipid regulation of oligomerization  
49 processes, as it can occur at low concentrations and does not require global changes in membrane  
50 properties.

## 51 INTRODUCTION

52

53 Lipid bilayers are the most common means of chemical compartmentalization in biology. The bilayer  
54 interior, formed by the acyl chains, is a  $\approx 30$  Å layer of low-dielectric fluid oil (Fricke, 1925) that provides  
55 a natural electrostatic barrier for the passage of charged and polar species. This insulating core enables the  
56 cell to generate trans-bilayer chemical and electrical potential-energy gradients that fuel essential  
57 metabolic functions. While the macroscopic structure of the lipid bilayer is shared across nearly all species  
58 and organelles, their chemical compositions are remarkably diverse. For example, phospholipids can vary  
59 in their headgroup moieties, in the length and degree of saturation of the acyl chains, and in the chain-  
60 headgroup linkage, i.e. ester vs. ether (Meer et al., 2008). Acyl chains can feature modifications such as  
61 branching, or even form covalent bonds across monolayers, as in tetraether lipids (Valentine, 2007).  
62 Lipidomics studies indeed show that cellular membranes include hundreds of lipid types (Brügger, 2014).  
63 It has been proposed that this diversity is in part explained by the “homeoviscous adaptation” of cells, i.e.,  
64 the need to maintain an appropriate membrane fluidity under a wide variety of environmental conditions  
65 (Sinensky, 1974). For example, a recent study indicates that under varying dietary fatty acid input,  
66 mammalian cells alter the lipid composition of their membranes to regulate this key property (Levental et  
67 al., 2020). Yet, some of these compensatory chemical changes appear to be excessively redundant. For  
68 example, under cold growth temperatures *E. coli* generates unsaturated lipids to increase membrane  
69 fluidity, but it also increases production of short-chain lipids (Marr and Ingraham, 1962; Sanders and  
70 Mittendorf, 2011). Do these different chemical strategies target others cellular processes that change  
71 coincidentally with variations in fluidity? Is there more to the vast diversity in lipid compositions observed  
72 across different types of membranes and conditions, beyond the basic requirement of a fluid lipid bilayer?

73 One possibility is that this lipid diversity reflects a coupled relationship with the other major  
74 constituent of all cellular membranes, namely integral membrane proteins (Phillips, 2018). The  
75 mechanisms of these proteins are, fundamentally, not unlike those of water-soluble proteins, and entail  
76 processes such as molecular recognition, conformational exchange and catalyzed chemistry. For  
77 membrane proteins, however, the lipid bilayer provides a distinct reaction environment where lipid  
78 molecules are the primary solvent. In any biological equilibrium reaction, the solvent plays a major role  
79 in defining the energetic landscape; it seems therefore logical to hypothesize that the variability in the  
80 chemical composition of physiological membranes might reflect adaptive mechanisms of regulation of

81 protein structure and function. A key question is, however, how this kind of regulation can be sufficiently  
82 targeted and specific, rather than globally disruptive.

83 Here, we examine the role of the lipid bilayer in a highly prevalent reaction in membrane biology,  
84 namely protein oligomerization. Indeed, among membrane-protein classes of known structure,  
85 approximately 70% are found as homo- or hetero-oligomers (Aleksandrova et al., 2019), compared with  
86 about 55% of water-soluble proteins. This comparison is striking because the principal driving force for  
87 the formation of protein oligomers in water, i.e. the hydrophobic effect (Tanford, 1978), cannot be a  
88 dominant factor in the membrane, as its interior is largely dehydrated. Membrane protein complexes do  
89 bury large non-polar surfaces, bringing many hydrophobic side-chains into close proximity, in the range  
90 of van der Waals interactions. Yet, it is unclear whether this kind of protein-protein contacts are the main  
91 drivers for the association of integral membrane proteins (Cristian et al., 2003) as these side chains also  
92 form numerous, similarly favorable contacts with lipids in the dissociated states. Likewise, it is not evident  
93 that interfacial tensions at the protein-lipid boundary are a dominant factor; while the acyl-chain core  
94 would favor association to reduce the total area of the protein-lipid interface, the head-group layer has an  
95 opposite effect (Dixit and Lazaridis, 2020; Marsh, 2008).

96 Nonetheless, it has long been recognized that the complementarity between membrane proteins  
97 and their lipid environment is imperfect, resulting in different kinds of perturbations in the structure and  
98 dynamics of the bilayer (Marsh, 2008). In the context of protein-protein association, local perturbations  
99 in membrane thickness are particularly noteworthy; this effect, referred to as “hydrophobic mismatch”,  
100 has been shown to be a key factor in the dimerization equilibrium of helical peptides such as Gramicidin  
101 A (Goforth et al., 2003; Andersen and Koeppe, 2007) and WALP (Sparr et al., 2005), and has also been  
102 proposed to explain the organization of various rhodopsins and other GPCRs (Mondal et al., 2013)  
103 (Pearson et al., 1983; Soubias et al., 2015). This type of perturbation results from a suboptimal match  
104 between the exposed non-polar surface of a transmembrane protein and the intrinsic thickness of the acyl-  
105 chain core of the bilayer, for a given composition. This mismatch typically forces the bilayer to deform,  
106 which translates into an energetic penalty; thus, oligomeric states that minimize this penalty are favored,  
107 at least in regard to the membrane energetics. Furthermore, because this energetic penalty will depend on  
108 the bilayer material properties, variations in lipid composition might provide a means for the cell to  
109 regulate oligomerization processes (Andersen and Koeppe, 2007). However, the potential for this seems  
110 limited, as there is an inherent biological drive for cells to maintain the basic biophysical properties of  
111 their membrane through homeostatic adaptation (Levental et al., 2020). Thus, we hypothesize that the



112 physiological mechanism of lipid regulated oligomerization equilibrium will involve molecular  
113 mechanisms that occur at low concentrations of regulatory lipids within the membrane, and in the absence  
114 of large-scale membrane perturbations.

115 A key to evaluating the dominant driving forces for membrane protein oligomerization is to  
116 develop assays that quantify this kind of equilibria in lipid bilayers with sufficient accuracy and sensitivity  
117 to variations in lipid composition. Previously, we established such an assay based on single-molecule  
118 fluorescence microscopy, and carried out measurements of the free-energy of dimerization of the *E. coli*  
119 Cl<sup>-</sup>/H<sup>+</sup> antiporter CLC-ec1 (**Fig. 1A**) in 2:1 palmityl, oleoyl phosphatidyl-ethanolamine/phosphatidyl-  
120 glycerol (2:1 POPE/POPG) lipid bilayers (Chadda et al., 2016). These membranes are a synthetic mimic  
121 of the *E. coli* polar-lipid content, and consist of C16:0/18:1 acyl-chains, the most commonly found in  
122 biological membranes (Phillips, 2018). While CLC-ec1 had been known to exist as a homodimer in  
123 detergent and membranes (Maduke et al., 1999; Dutzler et al., 2002), our measurements revealed this  
124 complex results from association of two functionally competent monomers (Robertson et al., 2010), via  
125 an interface of about 1200 Å<sup>2</sup>, most of which is inside the membrane (**Fig. 1B**). Specifically, the measured  
126 equilibrium dimerization free energy for this complex is -10.9 kcal/mole, relative to a standard state of 1  
127 monomer/lipid (Chadda et al., 2018). This is a remarkable finding, in that it implies that the population of  
128 dissociated monomers at biological protein-expression levels is virtually zero. This interaction is thus  
129 reminiscent of obligate water-soluble homomeric complexes, whose association is dominated by the  
130 hydrophobic effect (Bahadur et al., 2003; Yan et al., 2008); by analogy, it is reasonable to infer that the  
131 energetics of the lipid solvent might also be key for CLC-ec1 dimerization. Indeed, examination of the  
132 dimerization interface shows that the two central helices are much shorter than what is typical in  
133 transmembrane segments (**Fig. 1B**). In the monomeric state, a significant hydrophobic mismatch might  
134 therefore exist between this protein surface and the surrounding membrane (**Fig. 1C**), which would be  
135 completely eliminated upon dimerization, possibly explaining the remarkable stability of this complex.

136 CLC-ec1 thus appears to be an excellent system to examine the fundamental questions outlined  
137 above. That is, can protein-induced membrane deformations contribute to explain the structure and  
138 stability of obligate membrane protein complexes? What is the extent of the changes in membrane lipid  
139 composition that are necessary to influence these oligomerization reactions, what is the underlying  
140 mechanism, and importantly, are those changes physiologically viable, i.e. do they preserve or impair  
141 protein function? To address these questions, we first use molecular dynamics simulations of monomeric  
142 and dimeric CLC-ec1 in 2:1 POPE/POPG, to evaluate the lipid bilayer structure in each state. This analysis

143 informs a series of new experimental assays, namely small-angle neutron scattering measurements, Cl<sup>-</sup>  
144 transport assays and single-molecule photobleaching analyses, with which we determine how varying  
145 quantities of short-chain C12:0, di-lauryl (DL) lipids alter the dimerization equilibrium as well as the  
146 activity of this transporter. To obtain a molecular level interpretation for these new experimental results,  
147 we return to molecular dynamics simulations in membrane mixtures that mimic the experimental  
148 conditions. These studies lead to a perspective of the dimerization reaction as primarily controlled by the  
149 energetics of local lipid solvation of the associated and dissociated states (Marsh, 1995, 2008), and  
150 underscores the essential role of molecular-scale heterogeneity of the lipid bilayer in defining membrane  
151 protein association equilibria.

152

## 153 **RESULTS**

154

### 155 **The CLC-ec1 dimerization interface causes a structural defect in the surrounding membrane.**

156

157 As mentioned, the features of the CLC dimerization interface (**Fig. 1B**) suggest that, when exposed in the  
158 monomeric state, there might be a hydrophobic mismatch with the surrounding membrane (**Fig. 1C**). If  
159 so, the energetic cost associated with solvating the monomer could translate into an effective driving force  
160 towards dimerization; by burying these ‘problematic’ interfaces away from the lipids, the system would  
161 gain free energy upon association (**Fig. 1D**). To begin to validate or refute this hypothesis, we first studied  
162 the structure of the lipid bilayer around the CLC-ec1 monomer and dimer, using coarse-grained molecular  
163 dynamics (CGMD) simulations, and evaluated whether the exposed dimerization interface indeed appears  
164 to cause the membrane to adopt a higher-energy state, relative to the other regions of the protein surface.  
165 For both monomer and dimer we used 2:1 POPE/POPG membranes (**Fig. 2 - fig. supp. 1A**), corresponding  
166 to the C16:0/18:1 acyl chains used in our previous experimental measurements of the reversible  
167 dimerization reaction (Chadda et al., 2016).

168 It is worth noting that any simulation of a non-homogenous membrane necessarily presupposes an  
169 initial spatial distribution of the lipid components, which is not only arbitrary but also may not be  
170 representative of the equilibrium condition. Prior to examining the structure of these membranes, it is  
171 therefore key to ascertain that the simulations are long enough for the two lipid components to mix fully  
172 and spatially re-distribute according to the free-energy landscape of the molecular system. One way to  
173 examine this process of mixing is to quantify, for each lipid in the simulation box, what fraction of all

174 other lipids in the same leaflet are at some point part of their first solvation shell. In our case, this analysis  
175 shows that each lipid, on average, is in direct contact with 80% of all other lipids in the course of each of  
176 our simulations (i.e. over 1,100 molecules) (**Fig. 2 - fig. supp. 1B**). Given that at any given timepoint, a  
177 solvation shell consists of fewer than 10 lipids, this result implies extensive mixing and hence no concerns  
178 in regard to the starting condition. We also examined the orientation of the protein in the bilayer, which  
179 is also an arbitrary initial condition. This analysis indicates that the simulations broadly explore orientation  
180 space, resulting in clearly defined probability distributions for both monomer and dimer (**Fig. 2 – fig.**  
181 **supp. 1C**).

182 With sufficient lipid exchange over the time-scale of the simulations, we proceeded to analyze the  
183 shape of the lipid bilayer near the monomer and the dimer as well as other structural descriptors (**Fig. 2 -**  
184 **fig. supp. 2**). From the simulated trajectories, we calculated 3D density maps reflecting the spatial  
185 distribution of both acyl chains and ester linkages in the protein vicinity (**Fig. 2A, B**). The results for the  
186 monomer show that the membrane shape is deformed at the dimerization interface, thinning near the two  
187 shorter helices at the center. Elsewhere along the monomer perimeter the membrane is largely  
188 unperturbed, and its shape is nearly identical to what we observe for the dimer, confirming the simulations  
189 are probing the membrane structure reliably. Quantitative analysis of bilayer thickness, measured by the  
190 separation between the outer and inner ester layers and represented on a 2D heat map, shows that the  
191 magnitude of this thinning defect is about 8 Å relative to the bulk (**Fig. 2C**), i.e. nearly a quarter of the  
192 unperturbed hydrophobic thickness of this 2:1 POPE/POPG membrane. This defect is also clearly specific  
193 to the dimerization interface in the monomeric state; consistent with the 3D density maps. Smaller defects  
194 are discernable elsewhere but, as noted, they are indistinguishable if monomer and dimer are compared.

195 Membrane thickness deformations are sometimes conceptualized as resulting from spring-like  
196 compressions or extensions of the lipid chains (Andersen and Koeppe, 2007; Brown, 2017). In this case,  
197 however, the mean acyl chain end-to-end distance near the protein is only a fraction of 1 Å smaller than  
198 the bulk value (**Fig. 2 - fig. supp. 3A**); this minor perturbation is also not specific to the dimerization  
199 interface, but is present at other regions. Therefore, the thinning defect that we observe does not arise due  
200 to a significant compression of the acyl chains. Instead, our simulations show that increased lipid tilt is  
201 in large part what leads to the membrane thinning. This effect is clear from analysis of the orientation of  
202 the acyl chains in terms of the coarse-grained equivalent of a second-rank order parameter, which reveals  
203 a clear change at the dimerization interface (**Fig. 2 – fig. supp. 3B**). To quantify this effect more directly,  
204 we evaluated the mean lipid-chain tilt angle across the system, relative to the membrane normal (**Fig. 2D**).

205 In the bulk, this angle averages to  $0^\circ$  for one leaflet and  $180^\circ$  for the other, as one would expect, as the  
206 lipid dynamics are isotropic. Approaching the dimerization interface, however, this angle increases  
207 gradually and is maximally deflected by  $60^\circ$ , in both leaflets. This drastic change in orientation can be  
208 clearly visualized in 3D by analyzing the “average structure” of the lipid molecules residing at different  
209 positions along the membrane (**Fig. 2E**). In the bulk, this average yields a linear structure, perfectly  
210 perpendicular to the membrane mid-plane, again due to the isotropy of the lipid configurational dynamics.  
211 However, the lipids that are closest to the dimerization interface (yellow helices) adopt tilted, non-bilayer  
212 configurations in order to optimally solvate the protein. Alongside this drastic change in tilt angle, we  
213 also observe that near the dimerization interface the acyl chains in one leaflet show a greater degree of  
214 inter-digitation with those in the other leaflet (**Fig. 2 – fig. supp. 3C**), compared to the bulk or elsewhere  
215 along the protein perimeter.

216 In summary, our simulation data clearly shows that when the dimerization interface of CLC-ec1  
217 is exposed to the lipid solvent, it deforms the surrounding membrane by thinning and twisting the bilayer  
218 structure (additional effects in lipid density and hydration will be discussed later below). To solvate this  
219 ‘problematic’ interface, C16:0/18:1 lipids must adopt non-bilayer configurations that are significantly  
220 tilted and more entangled with lipids in the opposite leaflet. Interestingly, the perturbations we observe  
221 are in all cases symmetric with respect to the bilayer midplane, consistent with the fact that the CLC-ec1  
222 monomer consists of two topologically inverted structural repeats; this observation further underscores  
223 that it is the protein structure that dictates the morphology of the adjacent bilayer. Altogether, these results  
224 clearly indicate that optimal lipid solvation of the monomeric state in C16:0/18:1 lipids requires the  
225 membrane to adopt a high-energy conformation. Because dimerization completely eliminates this  
226 membrane defect, the cost of lipid solvation of monomeric CLC-ec1 must therefore translate into an  
227 attractive force. Although the precise magnitude of this stabilizing effect is not directly revealed by the  
228 results presented thus far, our single-molecule TIRF assays enable us to evaluate its significance  
229 experimentally. That is, if solvation of the membrane defect caused by monomeric CLC-ec1 indeed  
230 implies a dominant energetic penalty, then the dimerization equilibrium should be shifted towards the  
231 monomeric state by introducing lipids that are a ‘better’ solvent for this defect; this shift should be  
232 reflected in the measured free-energy of dimerization.

233

234 **Evaluating short-chain lipids as an alternative lipid solvent.**

235

236 Since the membrane defect induced by monomeric CLC-ec1 is constructed by hydrophobic thinning, we  
237 decided to test this hypothesis by introducing short-chain di-lauryl (DL) C12:0 lipids into the C16:0/18:1  
238 PO lipid membranes while keeping the overall 2:1 PE/PG headgroup composition constant (**Fig. 3A**). DL  
239 lipids are shorter than PO lipids by 4-6 carbons per chain, and are also fully saturated, losing the  $\omega$ -9  
240 double bond in one chain. Before drawing any conclusions in regard to the CLC-ec1 dimerization, we  
241 sought to characterize the intrinsic properties of these quaternary lipid bilayers. To do so, we first  
242 measured phase-transition thermograms for different DL/PO ratios by differential scanning calorimetry  
243 (**Fig. 3B**). The mixtures show broad profiles; however, the membranes are fluid at room temperature,  
244 with the exception of the 100% DL condition. Plotting the peak  $T_m$  as a function of DL shows eutectic  
245 behavior with a minimum  $T_m$  at about 30% DL (**Fig. 3C**). Next, we examined the structure of the DL/PO  
246 bilayers at 25 °C with small-angle neutron scattering (SANS). Using a spherical, multi-lamellar liposome  
247 model to fit the scattering spectra (**Fig. 3D,E**), we observe a gradual decrease in the bilayer thickness as  
248 the DL content is increased (**Fig. 3F**); at 70% DL, the membrane is about 6 Å thinner than that with no  
249 DL. This change is consistent with published SANS measurements for POPC vs. DLPC (Kučerka et al.,  
250 2011) and POPG vs. DLPG (Pan et al., 2014). It also approximately matches the magnitude of the defect  
251 created by the CLC-ec1 monomer (**Fig. 2C**), indicating that the DL lipids in these mixtures might be  
252 suitable for solvating the dimerization interface.

253 To understand how addition of DL impacts the bilayer thickness at the molecular level, we also  
254 carried out coarse-grained molecular dynamics (CGMD) simulations for the pure PO/DL membranes. As  
255 the DL content is increased, the observed change in thickness in the simulations reproduce the  
256 experimental trend, despite the approximations inherent to the CG forcefield (**Fig. 3G**). Further analysis  
257 indicates a high degree of cooperativity between the two lipid-chain types: for example, if the bilayer  
258 thickness is quantified by the distance between the two ester layers, there is virtually no difference when  
259 this distance is evaluated only for DL vs. PO lipids, at any % DL (**Fig. 3G**). This observation indicates  
260 that as DL is added, their lipid headgroups remain aligned with those of the PO lipids so as to minimally  
261 perturb the degree of hydration of the headgroup layer. It is worth noting that the average number of  
262 contacts formed between the acyl chains in one leaflet and those in the other is also a conserved quantity,  
263 regardless of the PO/DL content (**Fig. 3H**). For example, comparing the 0% and 10% DL membranes, we  
264 observe that a given DL chain can form only half of the interleaflet contacts seen for the PO chains in the  
265 absence of DL. However, to counter this destabilizing effect, PO lipids slightly increase the number of  
266 interactions they form across the membrane midplane and become more interdigitated; as a result, the

267 number of chain contacts is, on average, unchanged, but this translates into a thinning of the bilayer. It  
268 appears, therefore, that an optimal degree of headgroup-layer hydration and interleaflet contacts dictates  
269 the thickness of the pure PO membrane; as DL lipids are added these PO/DL membranes adapt to preserve  
270 these two quantities, which requires them to become thinner. The significance of these conserved  
271 quantities will be discussed again further below.

272

273 **Short-chain lipids shift CLC dimerization equilibrium without effect on protein function or global**  
274 **membrane changes.**

275

276 Following these results, we investigated whether the monomer-dimer equilibrium can be influenced by  
277 addition of DLPE/PG lipids to the POPE/PG membranes, using our previously established single-  
278 molecule subunit-capture approach (Chadda et al., 2016; Chadda and Robertson, 2016). In this method,  
279 the protein is site-specifically labelled with a Cy5-maleimide fluorophore and reconstituted into lipid  
280 bilayers that are fused into large multilamellar vesicles by freeze/thaw cycles. In this state, the membrane  
281 area is sufficiently large to permit monomer and dimer populations to equilibrate according to the  
282 association constant of the reaction and the protein to lipid mole fraction,  $\chi_{\text{protein}}$ . The oligomeric-state  
283 distribution resulting from this equilibrium condition is quantified by fragmenting the membranes into  
284 fixed liposome compartments via extrusion, and by counting the probability distribution of subunit capture  
285 by single-molecule photobleaching analysis using TIRF microscopy. The photobleaching probability  
286 distribution follows a Poisson distribution provided one considers heterogenous compartments and  
287 multiple protein species (Cliff et al., 2019), and thus the population of oligomeric species can be quantified  
288 using this approach. However, it is also important to control for other factors that affect the probability  
289 distribution such as the protein labeling yield and liposome size distribution. Our site-specific labeling  
290 procedure (Chadda et al., 2016; Chadda and Robertson, 2016) provides a consistent labeling yield,  $P_{\text{Cy5,WT}}$   
291  $= 0.66 \pm 0.00$  (mean  $\pm$  sem,  $n = 27$  independent purifications with Cy5 labeling, **Fig. 4 – source data 3-**  
292 **6, Fig. 5 – source data 1,2**); thus, as long as we know the liposome size distribution, we can determine  
293 any changes of CLC-ec1 dimerization equilibrium in different lipid environments.

294 Using this approach, we set out to study the degree of CLC dimerization in a single mixed lipid  
295 condition in which we observe thinner membranes, namely 20% DL. Our first step was to examine the  
296 mixed DL/PO liposomes using cryo-electron microscopy imaging. 2:1 PE/PG membranes containing 20%  
297 DL and 80% PO were prepared, freeze-thawed into multi-lamellar vesicles, extruded through 400 nm



298 filters and then imaged and analyzed to measure the size distribution directly. The liposomes and  
299 membranes appear similar to those in the 0% DL condition (i.e. 2:1 POPE/POPG), with comparable radius  
300 and fractional surface area distributions (**Fig. 4A-C**). There is a significant proportion of multilamellar  
301 vesicles in both compositions, 44% for 20% DL and 25% for 100% PO samples. Next, WT-Cy5 20% DL  
302 liposomes were imaged by single-molecule TIRF microscopy. Example images and raw data for the  
303 photobleaching traces for PO and 20% DL liposomes (**Fig. 4D,E**) demonstrates no changes in the quality  
304 of images obtained in the different lipid conditions. While the cryo-EM imaging indicated no significant  
305 differences in liposome size distributions, we also examined the photobleaching probability distributions  
306 of two experimental controls: I201W/I422W, referred to as ‘WW’, a version of the protein with two  
307 tryptophan substitutions at the dimerization interface (Robertson et al., 2010) that reports the fixed  
308 monomer probability distribution; and R230C/L249C, or ‘RCLC’, a disulfide cross-linked constitutive  
309 dimer (Nguiragool and Miller, 2007) that reports the fixed dimer probability distribution (Chadda et al.,  
310 2018). Photobleaching analysis of these controls in 20% DL liposomes show dependencies on the protein  
311 mole fraction comparable to those observed for the 2:1 POPE/POPG composition (**Fig. 4 – fig. supp.**  
312 **1A,B**). Thus, our analyses indicate that the 20% DL, 80% PO 2:1 PE/PG liposome population is  
313 comparable to the 100% PO condition, allowing us to attribute changes in the single-molecule  
314 photobleaching distributions to specific changes in CLC dimerization.

315 With our quantification method benchmarked, we analyzed the photobleaching probability  
316 distribution of WT CLC-ec1 in 20% DL 2:1 PE/PG lipid bilayers and compared it to the WW and RCLC  
317 control data in the same lipid condition (**Fig. 4F**). Calculation of the fraction of dimer in these protein  
318 populations, from least-squares fitting to the WW and RCLC reference distributions, shows that  
319 dimerization is significantly destabilized, i.e. the equilibrium is shifted towards the monomeric state (**Fig.**  
320 **4G**). By fitting to an equilibrium dimerization isotherm, we estimate a lower-limit of the  $K_D > 4.2 \pm 1.3$   
321  $\times 10^{-6}$  subunits/lipid, as the reaction falls out of the dynamic range for these measurements leading to an  
322 insufficient fit of the reaction. Still, the limited reaction indicates that the 20% DL condition destabilizes  
323 dimerization by at least +3 kcal/mole. To verify that this shift reflects a new equilibrium, we also  
324 examined whether the mostly dimeric population of CLC-ec1 in 2:1 POPE/POPG lipid bilayers is driven  
325 towards the monomer state when fusing the proteo-liposomes with DL containing membranes. **Fig. 4H**  
326 shows the resultant distribution of diluting  $\chi_{protein} = 2 \times 10^{-6}$  subunits/lipid proteoliposomes 1:1 via  
327 freeze-thawed fusion with either 0% DL or 40% DL (i.e. final DL proportion is 20%). Indeed, after  
328 incubating the fused samples for 5 days at room temperature, the probability distribution showed a

329 significant shift towards monomers, indicated by an increase in single steps,  $P_1$  (**Fig. 4 – fig. supp. 1C,D**).  
330 Therefore, alternative approaches consistently demonstrate that the short-chain DL lipid shifts the  
331 oligomeric distribution of CLC-ec1 towards the monomeric form. Finally, we examined whether CLC-  
332 ec1 remained functional in this new membrane environment. To do so, we carried out chloride efflux  
333 measurements from CLC-ec1 proteo-liposomes (Walden et al., 2007) and quantified the chloride transport  
334 activity as a function of DL in the membrane. The protein remained effective at transporting chloride in  
335 20% DL (**Fig. 4I**), with no difference in the fraction of inactive vesicles (**Fig. 4J**), and a modest 2-fold  
336 decrease in chloride efflux rate (**Fig. 4K**). Therefore, CLC-ec1 is significantly destabilized towards the  
337 dissociated monomeric form in 20% DL, 80% PO 2:1 PE/PG membranes, yet remains a functionally  
338 competent chloride transporter in the new lipid composition.

339 Next, we examined how dimerization depends on the DL/PO ratio by carrying out a titration  
340 experiment, studying the monomer-dimer population as a function of DL, from 10<sup>-8</sup> to 80% (**Fig. 5A**).  
341 Note these experiments were conducted at dilute protein densities within the membrane, with 1 subunit  
342 per million lipids ( $\chi_{protein} = 1 \times 10^{-6}$  subunits/lipid), where WT CLC-ec1 is  $\approx$  80% dimeric in 2:1  
343 POPE/POPG. Based on our experiments of WW and RCLC controls (**Fig. 4F**, (Chadda et al., 2018)), we  
344 know a dimeric population is expected to yield comparable probabilities of single and double steps ( $P_1 \approx$   
345  $P_2$ ), while a monomeric population will exhibit mainly single steps ( $P_1 > P_2$ ). The reason why a dimeric  
346 population includes a significant observation of single steps is because our experimental labeling yield is  
347  $P_{Cy5} = 0.66$ , and binomial statistics predicts a nearly equal proportion of singly and doubly labelled Cy5  
348 dimers, as demonstrated by our previous theoretical simulations (Chadda et al., 2016; Chadda and  
349 Robertson, 2016; Cliff et al., 2019). The raw photobleaching probability distributions show a population  
350 shift from nearly all dimers in 0% DL to all monomers at 80% DL, which resembles the distribution of  
351 WW in 2:1 POPE/POPG. Calculation of  $F_{dimer}$  from these data shows that the impact of DL on  
352 dimerization follows two phases with an inflection point around 1% DL (**Fig. 5B**). We also examined the  
353 dependency of CLC activity on the presence of DL in greater detail by measuring CLC dependent chloride  
354 efflux while titrating DL in the membrane (**Fig. 5 - fig. supp. 1**). For samples with 10% DL or less, we  
355 observed no change in chloride transport activity; by contrast, at 40% DL there is approximately a 70%  
356 reduction in transport rate. To compare how dimerization and function relate to bilayer structure, we  
357 plotted the normalized change in the bilayer thickness from the SANS data,  $\Delta d_B$ , with the normalized  
358 change in the dimeric population,  $\Delta F_{dimer}$  and the normalized change in transport rate  $\Delta k_P$  (**Fig. 5C**). From  
359 this plot, we can see that  $> 60\%$  of the dimerization changes occur below 10% DL, i.e. before there are



360 any major changes in the macroscopic structure of the membrane. However, the change in chloride efflux  
361 rate correlates directly with the change in bilayer thickness.

362 Therefore, while function appears to be impacted by global changes in membrane thickness  
363 following a simple trend, our photobleaching results demonstrate that dimerization equilibrium is coupled  
364 to the membrane in a more complex manner. Converting  $F_{Dimer}$  to the change in free energy of dimerization  
365 relative to the zero DL condition,  $\Delta\Delta G$ , highlights the two types of molecular linkage observed. At high  
366  $DL > 1\%$ , the complex is destabilized by  $0.8 \pm 0.3$  kcal/mole for every addition of 10% DL in the  
367 membrane (**Fig. 5D**). As this corresponds to the range where we observe membrane thinning, it is  
368 reasonable to assume this change is linked to the bulk properties of the membrane. However, at low DL  
369  $< 1\%$ ,  $\Delta\Delta G$  shows a linear dependency with the logarithm of DL, with a destabilization of  $0.14 \pm 0.07$   
370 kcal/mole for every  $\text{Log}_{10}$  change in % DL (**Fig. 5E, Fig. 5 - source data 1**). This coupling describes a  
371 microscopic process effected by DL, detectable even when DL is present in minimal amounts. It also  
372 indicates the molecular mechanism, as a linear dependency of  $\Delta\Delta G$  on the logarithm of the co-solvent  
373 activity corresponds to a thermodynamic linkage model of preferential solvation, as described by Tanford  
374 and others (Tanford, 1969; Record and Anderson, 1995; Marsh, 1995; Timasheff, 2002a).

375  
376 **Preferential solvation by DL at the CLC-ec1 dimerization interface.**

377  
378 To investigate whether preferential solvation is involved in the mechanism by which DL shifts CLC-ec1  
379 dimerization equilibrium toward monomers, we again turned to CGMD simulations. Specifically, we  
380 carried out simulations of the CLC monomer in bilayers of DLPE/DLPG/POPE/POPG lipids with a 2:1  
381 PE/PG ratio and a DL content of either 1%, 10%, 30% or 50% (**Fig. 6 - fig. supp. 1A**). Before drawing  
382 any conclusions from these simulations, we again ascertained that these complex bilayers do appropriately  
383 mix in the timescale of the trajectories, using a metric identical to that considered for the POPE/POPG  
384 simulations. Taking the 50% DL membrane as an example, we observe that by the end of the simulations,  
385 any one PO or DL lipid has been in direct contact with about 90% of all other lipid molecules in the same  
386 leaflet (**Fig. 6 - fig. supp. 1B**), indicating near-ideal equilibration.

387 We then proceeded to examine the structure of these membranes using the same descriptors as  
388 those employed above. Interestingly, the thinned-membrane defect around the dimerization interface is  
389 still observed in the mixed PO/DL simulations, even for 50% DL (**Fig. 6A**), and is comparable to what  
390 we find in the 2:1 POPE/POPG simulations (**Fig. 2C**). That is, the defect is observed even when the

391 ‘macroscopic’ thickness of the lipid bilayer is reduced; for example, for 50% DL, the thinning is about  
392 5.5 Å. Examination of the average lipid structure across the membrane show that both PO and DL lipids  
393 solvate the totality of the protein surface and that, as in the 100% PO condition, the thinned-membrane  
394 defect results from both types of lipids becoming increasingly tilted as they approach the dimerization  
395 interface (**Fig. 6B**, **Fig. 6 – fig. supp. 2**). However, 3D density maps for the first lipid solvation shell  
396 indicate these two lipid types are not distributed identically (**Fig. 6C**). At the two interfaces not involved  
397 in dimerization, the DL density signal weakens at the center of the membrane, revealing the DL chains  
398 are too short to solvate the hydrophobic span of the protein, which is better matched to PO lipids.  
399 Conversely, the density signal for PO is weaker than DL at the dimerization interface, and weaker than  
400 that seen in the 100% PO membrane, indicating PO is depleted here. This depletion, and the corresponding  
401 enrichment in DL lipids, becomes apparent in 2D projections of the percent difference between the  
402 observed lipid density ratio (DL/PO) and the expected bulk ratio (**Fig. 6D**). These data show that the  
403 normalized probability of observing DL rather than PO at the dimerization interface is higher than  
404 elsewhere in the membrane, irrespective of PO/DL composition. Conversely, DL is depleted at the other  
405 two interfaces, consistent with the 3D density analysis discussed above. Quantification of the DL  
406 enrichment as a function of the distance from the protein surface reveals this effect extends for up to 30  
407 Å from the dimerization interface and confirms that it is largely independent of the PO/DL ratio (**Fig. 6E**).

408 As noted above, increasing DL content ultimately results in a change in the overall thickness of  
409 the PO/DL bilayers. Thus, it could be reasonably argued that this ‘macroscopic’ effect would reduce the  
410 energetic cost of the thinned-membrane defect caused by monomeric CLC-ec1, irrespective of whether  
411 one lipid type or another is preferentially enriched, and thereby cause a shift in the dimerization  
412 equilibrium. It is important to note, however, that the enrichment effect we report is discernable at 1%  
413 DL, i.e. in conditions where there is virtually no change in the global thickness of the bilayer, relative to  
414 the PO condition, both in experiment and simulation (**Fig. 3F,G**). Yet, 1% DL has a profound impact on  
415 the dimerization equilibrium (**Fig. 5**). Limitations in computing speed currently preclude us from verifying  
416 this effect for even smaller quantities of DL lipids with adequate statistical significance. Nevertheless,  
417 the existing results underscore that a process distinct from a change of the global properties of the  
418 membrane is dominant in this regime, which we posit is that of preferential lipid solvation.

419 The observation of near complete lipid mixing in our simulations implies that the enrichment of  
420 DL at the dimerization interface is neither artifactual nor transient but rather a minimum free-energy state  
421 of the lipid-solvent structure. What are the molecular factors that explain this observation, i.e. what drives

422 the preferential residence of DL over PO in this specific region of the membrane? As mentioned above,  
423 our simulation data for the pure PO/DL bilayers indicates that the collective degree of interdigitation  
424 between opposing leaflets is a conserved quantity that dictates membrane structure. This interdigitation  
425 can be quantified by metrics such as the average number of interleaflet contacts formed by the acyl-chains  
426 (**Fig. 3G,H**). With this observation in mind, 2D maps of the number of interleaflet lipid contacts for the  
427 CLC-ec1 systems reveal key differences that seem to explain why DL is enriched at the dimerization  
428 interface (**Fig. 7A**). In the bulk, there is no difference between the 100% and 50/50 PO/DL conditions, for  
429 example, when all lipids are averaged. The number of interleaflet contacts is again a conserved quantity,  
430 as observed for the pure bilayers. At the CLC-ec1 dimerization interface, however, this conserved quantity  
431 cannot be matched by the PO lipids; whether for 100% PO or 50/50 PO/DL, PO lipids create an excessive,  
432 clearly non-native overlap between leaflets. By contrast, when at the dimerization interface, DL chains  
433 very closely reproduce the conserved bulk values. Thus, by segregating PO lipids away from this interface,  
434 and accumulating DL lipids instead, the system minimizes the negative impact of the thinned-membrane  
435 defect created by the CLC monomer, shifting the equilibrium towards the dissociated state.

436 The mitigating effect of the DL lipids is also apparent from other more conventional descriptors  
437 of bilayer structure. In **Fig. 7B**, for example, we quantify how the number of lipid near-neighbors varies  
438 across the membrane. The data shows that in 100% PO the CLC monomer introduces a clear lipid-density  
439 defect at the dimerization interface, particularly at the level of the headgroup and ester-linkage layers.  
440 This perturbation, in turn, leads to a marked increase in the degree of water penetration of the hydrocarbon  
441 interior of the bilayer, by almost 3-fold relative to the bulk-membrane values (**Fig. 7C**). As noted earlier,  
442 these perturbations impact both leaflets, in a manner that reflects the internal symmetry of the CLC  
443 monomer, and very likely signify a major energetic cost. The preferential solvation of the dimerization  
444 interface by DL does not entirely eradicate these defects, but it is clear from our data that they are greatly  
445 minimized (**Fig. 7B,C**). In view of these results, we can plausibly infer that in the PO/DL conditions the  
446 energetic cost of lipid solvation of the monomer is reduced, relative to the pure PO condition. This  
447 preferential solvation effect would in turn explain the shift in dimerization equilibrium observed  
448 experimentally, particularly at low DL concentrations.

449

450

451 **DISCUSSION**

452

453 This study demonstrates that the dimerization of a membrane protein can be driven in large part by the  
454 energetic cost of lipid solvation of the monomeric state, due to the exposure of a protein surface that  
455 deforms the membrane structure. While other factors may also contribute to the overall stability of the  
456 dimer, the significant dependency on membrane forces observed in this study implies that this  
457 oligomerization equilibrium can be regulated through variations in the chemical and physical nature of  
458 the lipid bilayer. In our studies, we observe that the monomer-dimer free-energy balance can be modulated  
459 by a mechanism of preferential solvation, i.e. the enrichment of specific lipid types that are more naturally  
460 predisposed to reside in the membrane defect caused by the dissociated protomers. This is an effect that  
461 occurs with low quantities of the modulatory lipid in the membrane, before macroscopic changes in  
462 membrane thickness are apparent, and where the functionality of the protein is preserved. In contrast,  
463 when global changes in membrane thickness become significant, the dimerization equilibrium has already  
464 shifted drastically, and the physical state of the membrane is observed to degrade protein function. Thus,  
465 we find that preferential solvation is a plausible contender for a mechanism of physiological regulation of  
466 membrane protein complexes in biological membranes. In the following sections, we discuss the  
467 molecular basis and physiological implications of such findings.

468

#### 469 **Burial of membrane defects is a significant driving force for CLC-ec1 dimerization.**

470

471 Our computational studies demonstrate that the CLC-ec1 monomer in 2:1 POPE/POPG introduces a non-  
472 native thinned defect in the surrounding membrane, due to the exposure of the shorter central helices that  
473 form the core of the dimerization interface. Experimentally, we have measured that the free energy of  
474 CLC-ec1 dimerization in 2:1 POPE/POPG lipid bilayers is  $-10.9 \pm 0.1$  kcal/mole (1 subunit/lipid standard  
475 state). Given the nature of the perturbations caused by the monomer, and the fact that this free-energy  
476 value can be drastically shifted by addition of minimal amounts of DLPE/DLPG lipids, we believe it is  
477 very likely that this dimerization reaction is driven primarily by the energetics of the membrane, with  
478 protein-protein interactions contributing on a smaller scale. Conclusive evaluation of this hypothesis will  
479 however require further experimental and computational investigations of the dimerization equilibrium  
480 for a range of protein constructs in different lipid bilayers and conditions, and a direct quantification of  
481 the anticipated differences in lipid solvation energetics of associated and dissociated states, in each case.

482 The concept that protein-induced membrane defects can translate into an effective driving force  
483 towards oligomerization presents a generalizable solution to the problem of membrane protein self-

484 organization, while allowing for evolutionary adaptations in amino-acid sequence that might be  
485 advantageous. In this perspective, association primarily depends on the overall protein architecture and  
486 the general chemical features of the protein surface. Strict conservation of specific amino-acids at specific  
487 sites on the protein surface is thus not critical though not entirely inconsequential. Membrane protein  
488 complexes may thus evolve high shape-complementarity, for example to maximize the exclusion of lipids  
489 in the complexed form of the protein (Li et al., 2013), and thereby achieve greater stability. Indeed,  
490 previous analysis showed that CLC-ec1 exhibits high shape-complementarity, comparable to other high-  
491 affinity antigen antibody complexes (Robertson et al., 2010).

492 As noted, membrane perturbations appear to influence the association of other systems as well.  
493 Assembly of Gramicidin A peptides into functional ion-channel dimers results in a hydrophobic mismatch  
494 with the surrounding bilayer, and thus dimerization can be inhibited by increasing the global membrane  
495 thickness (Goodall, 1971; Mobashery et al., 1997). FRET measurements for reconstituted Rhodopsin have  
496 indicated the formation of higher-order assemblies when the membrane is thicker or thinner than a certain  
497 range (Botelho et al., 2006). Computational studies have rationalized this kind of spatial organization as  
498 resulting from anisotropic defects in membrane thickness or curvature, which become mitigated upon  
499 association in specific geometries (Mondal et al., 2014) (Kahraman and Haselwandter, 2019). A striking  
500 illustration of this concept is found in the inner mitochondrial membranes, where ATP synthases, each a  
501 dimeric complex, spontaneously assemble into micrometer-scale linear arrays, priming the membrane to  
502 invaginate and form cristae (Anselmi et al., 2018; Blum et al., 2019). Thus, there is a growing body of  
503 evidence that suggests that membrane dependent forces are a key factor in the self-assembly and  
504 organization of membrane protein complexes. To our knowledge, however, this study is the first to probe  
505 how such forces can dictate the oligomerization equilibrium of a strongly-bound integral membrane  
506 protein complex, in the absence of global physical membrane changes, and without compromising its  
507 biological functionality.

508

### 509 **Preferential solvation vs. bulk membrane thickness vs. site-specific binding.**

510

511 The notion that dissociated and associated states of a membrane protein oligomer can perturb the bilayer  
512 in distinct ways, as a result of hydrophobic mismatch, implies it is conceivable that cellular mechanisms  
513 exist through which variations in lipid composition can regulate this type of equilibria (Andersen and  
514 Koeppe, 2007). However, different mechanisms can be envisaged. The relative energetics of solvation of

515 the dissociated and associated states would logically be altered if there is a global change in membrane  
516 thickness. Alternatively, a different mechanism could involve that certain lipids bind to the 'problematic'  
517 protein-membrane surface, in a manner similar to conventional agonists or antagonists.

518 Neither of these mechanisms, however, explain our experimental data. The first effect that we  
519 observe is when short-chain saturated DL lipids are added to PO bilayers at extremely low DL activities,  
520 ranging from 1 DL per  $10^{10}$  PO up to 1% DL. In this regime, we determined that the bilayer thickness is  
521 identical to that of PO membranes, and we measure no change in protein function. Yet, upon increasing  
522 the amount of DL, we detect a gradual correlated increase in the monomeric proportion of CLC-ec1, and  
523 this effect appears to be linear with respect to the logarithm of DL over six orders of magnitude (**Figure**  
524 **5F-H**). At first, it seems intuitive to interpret this data as a process of competitive inhibition, i.e. one or  
525 more DL-specific binding sites might exist at the dimerization interface, with an affinity of  $K_{D,DL}$ , the  
526 occupancy of which precludes dimerization. However, we can immediately see that our data do not agree  
527 with this type of linkage. This type of model would lead to complete saturation of the population of the  
528 monomeric state over a much narrower increase in % DL, at most thousand-fold, and centered at the  
529 hypothetical  $K_{D,DL}$ . The gradual, linear relationship of the decay of the dimeric population with the  
530 logarithm of % DL that we observe in our data, over six orders of magnitude, is simply not in agreement  
531 with a model of site-specific competitive binding.

532 Lipid-composition effects can be however conceptualized beyond the paradigms of bimolecular  
533 recognition or global morphological changes. If we consider lipids as solvent molecules (Marsh, 1995), a  
534 different type of linkage model, used to examine mixed aqueous solvent systems, explains our  
535 observations. The stability of soluble proteins, both as oligomeric assemblies or folds, is known to be  
536 dependent on the relative activities of the co-solvents present, due to preferential solvation effects  
537 (Tanford, 1969; Record and Anderson, 1995; Schellman, 1987, 2003; Timasheff, 2002b; Lee and  
538 Timasheff, 1981). That is, one state of the protein might be "preferentially solvated" by a given co-  
539 solvent, and so an increase in that co-solvent activity shifts the reaction equilibrium to that state. This is a  
540 form of linkage that describes how proteins can be stabilized or destabilized by salts, glycerol, sugar or  
541 chaotropic denaturants. It does not involve specific binding, but rather non-specific affinities that lead to  
542 a linear dependency of the change in free energy with the log-activity of the co-solvent, as we observe in  
543 our experiments.

544 While preferential solvation alone, i.e. without bulk-membrane changes, had not been previously  
545 demonstrated to impact the formation of obligate complexes of integral membrane proteins, the notion



546 that the features of the protein-lipid interface can dictate the spatial distribution of different lipid types in  
547 its vicinity has been previously documented. For example, in CGMD simulations of a wide set of  
548 membrane proteins in highly complex bilayers, it was observed that each protein induces a unique lipid  
549 solvation structure, akin to a “lipid fingerprint” (Corradi et al., 2018). Similarly, a simulation study of the  
550 Gramicidin A dimer in a two-component bilayer with C16:1 and C24:1 acyl-chains, reported that the latter  
551 become underrepresented in the first solvation shell, as the C16:1 chains better match the hydrophobic  
552 thickness of the dimer (Beaven et al., 2017). These results demonstrate that lipids distribute around the  
553 dimer to match the features of the protein, and this may contribute to changes in the overall stability.  
554 However, the interpretation of this observation is unfortunately limited because the monomeric state was  
555 not studied in these lipid compositions, and it is the change in lipid distribution between the dimer and  
556 monomeric states that provides the linkage to the oligomerization equilibrium during preferential  
557 solvation.

558 The experiments and simulations described in our study indeed confirm that preferential solvation  
559 effects alone can dictate the energetics of oligomerization reactions for integral membrane proteins, even  
560 those that are assumed to be obligate oligomers, where the associated form appears to be derived from  
561 evolutionarily pressures, e.g. CLC. That the monomer causes a thinned-membrane defect that is eliminated  
562 upon dimerization is key. We observe how at this defect the distribution of PO and DL lipids diverges  
563 from what would be expected based on their bulk ratio, and the shorter DL lipids become enriched while  
564 the PO lipids are depleted. This enrichment is specific to the dimerization interface, and therefore also  
565 specific for the monomeric state that exposes this interface. And importantly, it is observed irrespective  
566 of the PO/DL content of the bilayer, as could be expected for an effect that is dictated by the protein itself.  
567 Thus, although any deviation from the bulk-membrane homogeneity does entail a free-energy penalty, the  
568 larger gains resulting from a more optimal solvation of the exposed dimerization interface ultimately  
569 translate into a strong shift in favor of the monomeric state.

570 As is logical, the preferential solvation effect is ultimately superseded by more global changes in  
571 the state of the membrane; according to our SANS experiments, these changes begin to take place when  
572 the DL proportion exceeds 10%, which is the kind of change in lipid composition that has been typically  
573 evaluated in previous studies of membrane-driven organization processes. In this regime, we do observe  
574 an additional depletion of the dimer population, because the energetic penalty of solvating the monomer  
575 is further reduced as the membrane becomes thinner. However, in this high-DL range we also observe a  
576 correlated decrease in CLC-ec1 transport activity. That is, while the thinner DL/PO membranes match the

577 exposed dimerization interface better, they also compromise the functional integrity at high DL. While we  
578 do not have direct structural information about the protein under these conditions, one plausible  
579 interpretation for this functional degradation is that the structural mechanism of the protein is somehow  
580 impaired in globally thinner membranes. Preferential solvation would thus appear to be a more viable  
581 mechanism of lipid regulation of oligomerization reactions of specific species under physiological  
582 conditions where biology strives to maintain global membrane properties.

583

### 584 **Physiological implications for lipid modulation of membrane proteins.**

585

586 Preferential solvation is a generalizable effect that could modulate any equilibrium whereby one or more  
587 protein states introduce a local morphological defect into the membrane. Besides oligomerization  
588 reactions, this effect likely defines the energetics of the intermediate conformational states that are  
589 encountered during membrane protein folding, as well as gating, transport, and signaling. Given the  
590 highly complex composition of real biological membranes, one can therefore envisage that each of these  
591 conformational states will have a different local lipid composition, optimized to stabilize the structure of  
592 the membrane in that state. The relative free-energies of the combined protein-membrane system in each  
593 state will therefore be dependent on the lipid types that are available, which the cell can alter through e.g.  
594 regulation of lipid synthesis and degradation pathways.

595 While membrane protein reactions can be severely influenced in laboratory conditions through  
596 drastic changes in the chemical and physical state of membrane, a critical point to note is that a plausible  
597 regulatory mechanism must be effective in the actual range that is physiologically viable. Cell membranes  
598 are known to undergo changes in lipid composition due to many external factors (Marr and Ingraham,  
599 1962; Sanders and Mittendorf, 2011); yet, it is rare for a membrane to change its composition so much  
600 that its macroscopic structure is significantly altered. For instance, the membranes of *E. coli* cells grown  
601 at colder temperatures will primarily decrease chain saturation, with only minor changes to the amount of  
602 short-chain lipids. The resulting changes are presumed to maintain fluidity while maintaining an  
603 appropriate thickness of the membrane so that the majority of membrane proteins remain properly solvated  
604 and can still function optimally. Homeostatic adaptation of macroscopic membrane properties have been  
605 shown for mammalian cells also (Levental et al., 2020). As far as we know, there is no situation where a  
606 cell will change the overall macroscopic thickness of its membranes due to a physiological stimulus.  
607 Therefore, when contemplating possible mechanisms of physiological regulation within the membrane,



608 and particularly with chain-length in mind, we must consider that they should be consistent with low-level  
609 changes of these types of lipids within the membrane. Our experiments show that CLC-ec1 dimerization  
610 is sensitive to the amount of the short-chain DL lipid in the membrane; even at low levels, from  $10^{-8}$  to  
611 1%, we observe a gradual and non-saturating impact, indicating that dimerization is tunable without a  
612 global change in the state of the membrane. The resulting change in the dimer population, from 80% to  
613 50%, could certainly impart a physiological effect if it was linked to a cell signaling function. It is equally  
614 important to note that the phenomenon of preferential solvation naturally allows for this gradual tuning,  
615 as opposed to what would be expected for a process of site-specific lipid-ligand binding, which would  
616 inhibit dimerization in a switch-like manner over a much narrower range of DL-lipid concentrations.  
617 While site-specific binding mechanisms may be at play for some types of processes and specific lipid  
618 types, we anticipate that preferential solvation effects will be found to control diverse kinds of membrane  
619 protein equilibria in physiological settings.

620 Our examination of the impact of short-chain lipids on CLC-ec1 dimerization sheds light on a  
621 potentially ubiquitous mechanism of action by regulatory molecules within the membrane. In simulations,  
622 we observe the CLC-ec1 monomers force PO lipids to adopt non-native conformations, and many of the  
623 features of the bilayer near the dimerization interface, ranging from lipid tilt-angle to interleaflet contacts  
624 or water exclusion, are radically different from those in the bulk. When DL lipids are present, they  
625 disproportionately accumulate at this defect, spontaneously, while maintaining non-specific interactions.  
626 In doing so, DL lipids restore some of the bulk-like features to the bilayer near the dimerization interface.  
627 That is, although the defect remains, DL is a better solvent for it, and thereby stabilizes the dissociated  
628 monomeric state. A small lipid like DL could thus be considered a chemical that drives disaggregation,  
629 analogous to chaotropic denaturants stabilizing the un-folded states of proteins in aqueous solution. Many  
630 regulatory molecules in membranes are also small fatty acids; pharmacological agents like general  
631 anesthetics are small non-polar molecules as well. It is possible that these small lipoidal factors act  
632 similarly to DL in the problem examined here, and that they preferentially solvate and stabilize the  
633 membrane in states where local deformations and defects created by a protein become exposed. This may  
634 promote protein disaggregation, especially at high enough densities, and shift membrane protein equilibria  
635 to optimize activity. Altogether, our findings lead to the hypothesis that the complexity of lipid  
636 compositions found in biological cell membranes, leveraged through mechanisms such as preferential  
637 solvation, permits the cell to regulate and fine-tune the reactions of membrane proteins within – folding,  
638 oligomerization, and conformational changes – amidst the extremely variable conditions that life faces. It

639 will be fascinating to continue to unravel the nature of these processes through further experimental and  
640 simulation studies.

641

## 642 **CONCLUSION**

643

644 This study provides fundamental insights into an ubiquitous process in membrane physiology, namely  
645 protein oligomerization. It also yields a novel perspective of the mechanism by which cells could regulate  
646 the stability of membrane protein complexes through subtle variations in the lipid composition of the  
647 bilayer. Specifically, we have posited that a principal driving force for the oligomerization of membrane  
648 proteins stems from differences in the lipid solvation energetics of the associated and dissociated states.  
649 Such differences arise when one of the states in equilibrium introduces a perturbation in the bilayer that  
650 would not be naturally observed otherwise, i.e. one that implies a significant free-energy cost from the  
651 membrane standpoint. A driving force that originates in the energetics of lipid solvation is by definition  
652 highly sensitive to the composition of the membrane. In this regard, the perspective that emerges from  
653 this study differs from models that postulate site-specific binding or global changes in the state of the  
654 membrane. In our perspective, the lipid bilayer is a system of co-solvents that can alter their spatial  
655 distribution so as to preferentially solvate one or more of the states of any given reaction. A particular  
656 state might be therefore favored or disfavored, statistically speaking, depending on the energetics of the  
657 solvation structure that is achievable by a given co-solvent mixture. It follows that minimal changes in the  
658 lipid composition of the membrane can have a profound effect on specific oligomerization reactions,  
659 without any global morphological changes that might broadly compromise protein functionality, i.e. what  
660 is expected for a physiologically realistic regulatory process.

661

## 662 **ACKNOWLEDGEMENTS**

663

664 The Robertson lab is supported by the National Institute of General Medical Science, National Institutes  
665 of Health (R01GM120260, R21GM126476); the Faraldo-Gómez lab is funded by the Division of  
666 Intramural Research of the National Heart, Lung and Blood Institute, NIH. SCMT is grateful for support  
667 from the U. Delaware Center for Neutron Science, a cooperative agreement (70NANB15H260) with  
668 the National Center for Neutron Research at NIST, U.S. Department of Commerce. Access to the  
669 NGB30 SANS instrument was provided by the Center for High Resolution Neutron Scattering, a

670 partnership between the National Institute of Standards and Technology and the National Science  
671 Foundation under Agreement No. DMR-1508249. This work benefitted from the use of the SasView  
672 application, originally developed under NSF award DMR-0520547. SasView contains code developed  
673 with funding from the European Union's Horizon 2020 research and innovation program under the  
674 SINE2020 project, grant agreement No 654000. Computing resources were in part provided by the NIH  
675 Supercomputer Biowulf. We thank Kacey Mersch and Tim Lohman for useful discussions during the  
676 preparation of this manuscript. The identification of any commercial products or trade names does not  
677 imply endorsement or recommendation by the National Institute of Standards and Technology.

678

## 679 **METHODS**

680

681 **Coarse-grained molecular dynamics simulations.** All simulations were calculated with GROMACS 5.2.1  
682 (Abraham et al., 2015) using the MARTINI 2.2/EINeDyn22 forcefield (Wassenaar et al., 2015).  
683 Temperature and pressure were maintained constant at 303.15 K and 1 bar, using the velocity-rescale  
684 thermostat and the Parrinello-Rahman semi-isotropic barostat, respectively. Equations of motion were  
685 integrated using the leapfrog algorithm with a time step of 20 fs. Electrostatics were treated with the  
686 reaction field method using a cutoff of 1.2 nm. To ensure statistical significance, several independent runs  
687 were performed for each system (see **Fig. 2 – source data 1** for further details). The simulations are based  
688 on the crystal structure of wild-type CLC-ec1 dimer deposited in the Protein Data Bank, entry 1OTS  
689 (resolution 2.51 Å) (Dutzler et al., 2003). Chloride ions were included at sites  $S_{cen}$  and  $S_{int}$ , and E113  
690 (chains A and B) and D417 (chain A) were protonated as indicated from electrostatics analysis (Faraldo-  
691 Gómez and Roux, 2004) In the monomer state the N-terminus was truncated up to residue 30, as this  
692 cytoplasmic helix, which domain-swaps in the dimer, is highly flexible and able to adopt alternate  
693 conformations (Robertson et al., 2010) The atomic structure was coarse-grained using the *martinize* tool;  
694 different mixtures of POPE, POPG, DLPE and DLPG lipids were then added around the protein and the  
695 systems solvated. The total system charge was neutralized by addition of  $Na^+$  ions, and the system buffered  
696 with NaCl to a concentration of 150 mM. The preparatory stages included an 15,000-steps energy  
697 minimization using the steepest-descent method, and a 5-ns equilibration to bring the system to desired  
698 temperature and pressure. To simplify the visualization and analysis of trajectories, the protein was not  
699 permitted to rotate around the Z-axis (i.e. the membrane perpendicular) or to diffuse away from the  
700 membrane center. Note this is strictly equivalent to re-defining the laboratory frame as the molecular

701 frame for each snapshot, and thus these restrictions have no impact on the sampling of the internal  
702 configurational space. These orientational/translational restraints were implemented with PLUMED  
703 (Bonomi et al., 2009); specifically, two centers-of-mass, A and B, were defined using elements of helices  
704 H/P (residues 406-409, 411, 412, 194-196, 197, 198) and the linker regions between M/N and E/F  
705 (residues 138, 143-145, 347, 348,351-353). In the monomer simulations, harmonic potentials were used  
706 to keep both A and B on the YZ plane and equidistant from the membrane center. In the dimer, centers A  
707 and B were combined into a single center per monomer, C, and the same restraints were applied to keep  
708 the dimer on the YZ plane. The vertical drift of the membrane was also removed prior to trajectory  
709 analysis, by re-centering each snapshot so that the midpoint of centers A and B is fixed in place. For the  
710 pure bilayer simulations, the same was accomplished by holding fixed the z-component of the membrane  
711 center. To map any given descriptor of the lipid structure onto the x-y plane, a grid consisting of square  
712 cells each with an area of  $0.005 \text{ \AA}^2$  was constructed. Data derived from analysis of individual lipid  
713 molecules in each simulation snapshots were mapped onto specific grid points based on the XY position  
714 of the corresponding ester beads (GL1 and GL2); specifically, data was added to all grid points contained  
715 within the van der Waals radius of the beads. The grid-point data was then averaged over the all trajectory  
716 snapshots. To ascertain which grid-points reflect statistically significant data, the frequency with which  
717 each grid point was assigned to any lipid, referred to hereafter as the occupancy number, was annotated.  
718 Grid points with less than 40% of the average occupancy were considered to be not statistically significant  
719 and excluded from graphical representations and/or global averages. Occupancy numbers were also used  
720 to quantify the enrichment of DL lipids in the mixed PO/DL systems, relative to the bulk ratio.  
721 Specifically, the percent enrichment at grid point  $i$  was computed as

722

$$\%E_i = 100 \left( \frac{\left[ \frac{\rho_{DL}}{\rho_{PO}} \right]_i - \left[ \frac{\rho_{DL}}{\rho_{PO}} \right]_B}{\left[ \frac{\rho_{DL}}{\rho_{PO}} \right]_B} \right) \quad (1)$$

723

724 where  $\rho_{DL}$  and  $\rho_{PO}$  refer to the lipid occupancy number, for DLPX and POPX lipids respectively, and the  
725 subscripts  $i$  and B indicates the ratio at grid point  $i$  or the expected ratio in the bulk given the condition  
726 simulated, i.e. if both lipid types were distributed evenly across the box. To compute the enrichment as a

727 function of distance  $d$  from the protein (or a specific interface), grid points within a mask centered at that  
728 distance and 10 Å in width were selected. The percent enrichment was then computed as

729

$$\%E_d = 100 \left( \frac{\left[ \frac{\rho_{DL}}{\rho_{PO}} \right]_M - \left[ \frac{\rho_{DL}}{\rho_{PO}} \right]_B}{\left[ \frac{\rho_{DL}}{\rho_{PO}} \right]_B} \right) \quad (2)$$

730

731 where the subscript M refers to the sum of the occupancy numbers over the grid points found within each  
732 mask. All grid-based analysis tools are in-house software, available for download  
733 in <https://github.com/TMB-CSB/Membrane-Analysis-Tools-Gromacs> (Bernhardt & Faraldo-Gomez,  
734 2021), with the exception of the 3D density maps, which were calculated using the *volmap* plugin of VMD  
735 (Humphrey et al., 1996). For more details on the grid-based lipid metrics analysis see **Fig. 2 – fig. supp.**

736 **2**

737

738 **Preparation of lipids for reconstitution.** Detergent solubilized lipids were prepared as described before  
739 (Chadda et al., 2016) with the modification that dry lipids were solubilized in 2:1 chloroform:methanol  
740 followed by two washes in 3:1 pentane:dichloromethane. This was done due to the fact that DL lipids  
741 (DLPE or 12:0 PE; 1,2-dilauroyl-sn-glycero-3-phosphoethanolamine and DLPG or 12:0 PG; 1,2-  
742 dilauroyl-sn-glycero-3-phospho-(1'-rac-glycerol) (sodium salt)), unlike PO lipids, were found to be  
743 insoluble in chloroform or pentane alone.

744 For a typical preparation, 4 mL of POPE, and 2 mL of POPG (25 mg/mL stocks in chloroform,  
745 Avanti Polar Lipids Inc.) were combined in a glass vial (22 mm; RPI, Malvern, PA). The chloroform was  
746 evaporated under a continuous stream of 0.22 µm filtered N<sub>2</sub> gas (Ultra High Purity Nitrogen 5.0 Grade;  
747 Airgas). The dried lipid mass, was dissolved at least once in 2:1 chloroform/methanol followed by 1-2  
748 washes in 3:1 pentane/dichloromethane and drying while rotating, leaving a thin film of lipids along the  
749 walls and the bottom of the glass vial. The lipid film, containing 150 mg total lipids (100 mg POPE + 50  
750 mg POPG) was dried under continuous stream of N<sub>2</sub>, approximately 10-12 minutes. Next, after addition  
751 of 161.3 mg (21.5 mg/ml) CHAPS and 7.5 ml Dialysis Buffer (DB: 300 mM KCl, 20 mM citrate pH 4.5  
752 (adjusted with NaOH)) sonication was performed leading to a translucent suspension of the  
753 CHAPS/POPE/POPG mixture. The final concentration of components was 20 mg/mL 2:1 POPE/POPG

754 (mass ratio) and 35 mM CHAPS. DL lipids were prepared as follows: 40 mg DLPE, and 20 mg DLPG  
755 (powder, Avanti Polar Lipids Inc.) were added to a glass vial. The solids were solubilized in 2:1  
756 chloroform/methanol and then were taken through the identical washing procedure as PO lipids until a  
757 thin, uniform lipid film resulted after drying. Next 64.5 mg CHAPS and 3 mL DB was added followed by  
758 sonication. The final concentration of components was 20 mg/mL 2:1 DLPE/DLPG (mass ratio) and  
759 CHAPS at 35 mM. Finally, the PO and DL master stocks were mixed in different ratios (volume/volume)  
760 resulting in the quaternary lipid mixtures. For instance, to prepare 1 mL of the 20% DL (w/w) lipid  
761 mixture, 0.8 mL of the PO lipid stock was mixed with 0.2 mL of the DL lipid stock and used immediately  
762 for CLC reconstitution. For reference, the conversion of % DL (w/w) to mole fraction and molality are  
763 presented in **Fig. 5 - source data 3**.

764

765 **Differential Scanning Calorimetry (DSC).** The 2:1 PE/PG - PO and DL 25 mg/mL lipid stocks were solubilized  
766 in 2:1 chloroform:methanol as described above, and then mixed together to yield the following titration - 0, 10,  
767 30, 50, 70, 90, 100 %DL. After mixing, the lipids were dried under N<sub>2</sub> gas, and solubilized in DB (10-15 mg/mL)  
768 by sonication yielding the formation of small unilamellar vesicles. These samples were freeze-thawed 7x to form  
769 multi-lamellar vesicles, which were stored at room temperature and examined by DSC days-weeks after  
770 preparation. Samples were degassed prior to measurement, and data was collected using a MicroCal VP-DSC  
771 differential scanning calorimeter. Data were collected at multiple scan rates to ensure that there was minimal  
772 influence of the scan rate on the measured melting transition. Presented data were collected on heating from 2 °C  
773 to 50 °C with a scan rate of 30 °C/h and were baseline corrected. Source data is provided in **Fig 3. - source data**  
774 **1**.

775

776 **Cryo-EM measurements of liposome size distributions.** Cryo-electron microscopy (EM) imaging and  
777 analysis of images was performed as described earlier (Chadda et al., 2018; Cliff et al., 2019). Briefly,  
778 liposomes were freeze-thawed seven times, and then extruded through a 400-nm nucleopore filter (GE  
779 Life Sciences) 21 times. 3 µL of the undiluted sample was loaded onto a glow-discharged Lacey carbon  
780 support film (Electron Microscope Sciences), blotted, and plunged into liquid ethane using a Vitrobot  
781 System (FEI). Images were collected on a FEI Titan Krios G3 300kV Cryo-TEM microscope with a Gatan  
782 K2 Summit Direct electron detector (GATAN). Magnifications of 6500x, 33 000x and 53 000x were used.  
783 For size determination, liposomes were manually outlined in Fiji and ImageJ (Schindelin et al., 2012,  
784 2015) to measure the outer radii of all liposomes, including those located on the carbon. Multilamellarity



785 was manually counted as the fraction of vesicles containing more than one bilayer. Liposome size  
786 distribution source data is provided in **Fig. 4 - source data 1**.

787

788 ***Small-angle neutron scattering (SANS) experiments.*** Liposomes were prepared by drying as described  
789 previously, then sonicating the dried lipid films in reconstitution buffer prepared with 99.9% pure D<sub>2</sub>O  
790 (Cambridge Isotopes). Note, the *pD* of the buffer was measured by soaking the *pH* electrode in pure D<sub>2</sub>O  
791 for several minutes and then adjusted with NaOD for a final *pD* of 4.5 (Krężel and Bal, 2004). Prior to  
792 measurement, liposomes were freeze-thawed following the procedure described previously, then extruded  
793 in two steps, first through 400 nm filters and then through 100 nm nucleopore membranes.

794 SANS data were collected on the NGB30SANS instrument at the NIST Center for Neutron  
795 Research at the National Institute of Standards and Technology (NIST). Data were collected using a  
796 neutron wavelength ( $\lambda$ ) 6 Å and a wavelength spread ( $\Delta\lambda/\lambda$ ) of 0.12 with sample to detector distances of  
797 1 m, 4 m, and 13 m. Additional data were collected using  $\lambda = 8.4$  Å with a sample to detector distance of  
798 13 m. These instrument configurations provided access to a *q*-range of  $0.001 \text{ \AA}^{-1} < q < 0.04 \text{ \AA}^{-1}$  where *q*  
799 is the scattering vector and is defined as  $q = 4\pi\lambda^{-1}\sin(\theta/2)$  and  $\theta$  is the scattering angle. Samples were  
800 sealed in titanium cells with quartz windows and sample temperature was controlled at 25 °C ( $\pm 0.1$  °C)  
801 during data acquisition. Data were reduced to absolute intensity using the macros provided by NIST  
802 (Kline, 2006).

803 SANS data were analyzed with the multilamellar form factor in the SasView application. The data  
804 showed a broad shoulder at  $q \approx 0.06 \text{ \AA}^{-1}$  due to the presence of a mixture of unilamellar and multilamellar  
805 vesicles (Scott et al., 2019). SANS data were fit with an array distribution of *N*, where *N* is the number of  
806 lamellar shells and the reported results are for the distribution that gave the best fit to the data, defined as  
807 the minimum  $\chi^2$  value. Approximately 85- 90% of the vesicle population contained a single lamella which  
808 was in good agreement with Cryo-EM experiments that confirmed the presence of  $\approx 85\%$  unilamellar,  $\approx$   
809 10% bi-lamellar (vesicles containing 2 bilayers) and  $\approx 5\%$  multilamellar vesicles (vesicles with 3 or more  
810 bilayers).

811 Cryo-EM imaging of the liposomes also showed a bimodal distribution of vesicle sizes. The SANS  
812 analysis fixed the distribution of outer vesicle radii based on the cryo-EM results and only fit the data for  
813  $q > 0.015 \text{ \AA}^{-1}$  where the form factor contribution from the vesicle radii were constant (Pencer et al., 2006).  
814 The parameters fit during the analysis were the bilayer thickness ( $d_b$ ), the water layer thickness ( $d_w$ ) and

815 the scattering length density of the bilayer (results not shown). Source data is provided in **Fig. 3 - source**  
816 **data 2.**

817

818 **Protein purification, labeling, and reconstitution.** DNA constructs for CLC-ec1 C85A/H234C (WT),  
819 C85A/H234C/I201W/I422W (WW) (Chadda et al., 2016) and C85A/H234C/R230C/L249C (RCLC) were  
820 described previously (Chadda et al., 2018). Expression and purification of these CLC-ec1 variants was  
821 carried out as described earlier (Chadda et al., 2016). Briefly, proteins were overexpressed in BL21-AI  
822 *E.coli* competent cells and extracted into 2% n-Decyl- $\beta$ -D-Maltopyranoside (DM; Anatrace, Maumee  
823 OH) containing 5 mM TCEP (Tris(2-carboxyethyl)phosphine; Soltec Bioscience, Beverly, MA). After  
824 removing cellular debris by centrifugation, the protein was affinity purified using TALON cobalt affinity  
825 resin (Clontech Laboratories, Mountain View, CA) followed by size exclusion chromatography on  
826 Superdex 200 10/30 GL size exclusion column (GE Healthcare, Little Chalfont, UK) into size exclusion  
827 buffer (SEB): 150 mM NaCl, 20 mM MOPS pH 7.0, 5 mM analytical-grade DM.

828 Addition of TCEP during purification ensures that the engineered cysteine at the residue H234C  
829 remains reduced and available for maleimide labeling. This can be quantitatively estimated after reacting  
830 the purified protein with Ellman's reagent (DNTB, 5,5'-Dithio-bis(2-nitrobenzoic acid); Sigma-Aldrich)  
831 as described before (Chadda et al., 2016). Fluorescent labeling of the protein is conducted in presence of  
832 5X Cy5-maleimide followed by separation of unreacted dye using affinity and size-exclusion  
833 chromatography. Quantification of the Cy5 labeling yield per subunit,  $P_{Cy5}$ , was carried out as described  
834 previously (Chadda et al., 2016; Chadda and Robertson, 2016).

835 For reconstitution, Cy5-labeled protein is mixed 20 mg/mL lipids in DB + 35 mM CHAPS and  
836 then dialyzed in independent buckets to prevent the possibility of cross-contamination between different  
837 lipid compositions. Note, the effect of contamination during dialysis appears negligible in our  
838 experiments, as we quantified it by photobleaching analysis and observed a small, non-significant  
839 difference (**Figure 4 – fig. supp. 1E**).

840

841 **Functional measurements.** Chloride transport assays from 400 nm extruded liposomes were performed  
842 as described earlier (Walden et al., 2007; Chadda et al., 2016). Functional measurements were carried out  
843  $6.4 \pm 6.1$  days (mean  $\pm$  std,  $n = 2-5$ ) after freeze/thaw and sample incubation in the dark, at room  
844 temperature. Chloride transport was quantified in two ways, by fitting the initial slope by linear regression,  
845  $k_{init}$ , or fitting the full transport trace to the following exponential association function:



846

847

$$norm.Cl^- = F_{0,vol.}(1 - e^{-k_{leak}t}) + (1 - F_{0,vol.})(1 - e^{-k_{pt}t})$$

848

849 All data are listed in **Fig. 4 - source data 2**.

850

851 **Single-molecule photobleaching analysis and calculations of dimerization.** Proteoliposomes samples  
852 were extruded, imaged on TIRF microscope, and the videos analyzed for counting single-molecule  
853 photobleaching steps as described earlier (Chadda et al., 2016; Chadda and Robertson, 2016; Chadda et  
854 al., 2018). Briefly, dialyzed proteoliposomes were freeze-thawed seven times leading to formation of large  
855 multilamellar vesicles (MLVs). The samples were stored at room temperature, in the dark, with 0.02%  
856 NaN<sub>3</sub> until extrusion and single-molecule imaging. Overall, the Cy5 labeling yield was  $P_{Cy5} = 0.66 \pm$   
857  $0.00$  (mean  $\pm$  sem,  $n = 27$ ) for wild-type CLC-ec1 samples. Imaging was carried out 3-15 days after  
858 freeze-thaw and sample incubation in the dark, at room temperature. Images were analyzed as described  
859 previously using the *imscroll* software in MATLAB (Friedman and Gelles, 2015).

860

861 To quantify the underlying dimerization reaction from the photobleaching data, the same methods  
862 described in were followed (Chadda et al., 2016; Chadda and Robertson, 2016; Chadda et al., 2018).  
863 Briefly, photobleaching probability distributions ( $P_1, P_2, P_{3+}$ ) were determined for each construct as a  
864 function of protein density and lipid composition. The fraction of dimer in the protein population,  $F_{Dimer}$ ,  
865 was estimated by least-squares fitting of the linear combination of the probability distributions for the  
866 monomer and dimer controls under similar conditions. Equilibrium constants were obtained by fitting the  
867 data to an equilibrium dimerization isotherm,

867

$$F_{Dimer} = \frac{1 + 4K_{eq}\chi^* - \sqrt{1 + 8K_{eq}\chi^*}}{4K_{eq}\chi^*} \quad (3)$$

868

869 and then converted to  $\Delta G^\circ = -RT\ln(K_{eq})$ , standard state = 1 subunit/lipid. All data is listed in **Fig. 4 -**  
870 **source data 3-6** and **Fig. 5 - source data 1**.

871

872

873

874

875 **REFERENCES**

876

- 877 Abraham, M.J., T. Murtola, R. Schulz, S. Páll, J.C. Smith, B. Hess, and E. Lindahl. 2015. GROMACS:  
878 High performance molecular simulations through multi-level parallelism from laptops to  
879 supercomputers. *Softwex*. 1:19–25. doi:10.1016/j.softx.2015.06.001.
- 880 Aleksandrova, A.A., E. Sarti, and L.R. Forrest. 2019. MemSTATS: A Benchmark Set of Membrane  
881 Protein Symmetries and Pseudo-Symmetries. *J Mol Biol*. 432:597–604.  
882 doi:10.1016/j.jmb.2019.09.020.
- 883 Andersen, O.S., and R.E. Koeppe. 2007. Bilayer Thickness and Membrane Protein Function: An  
884 Energetic Perspective. *Annu Rev Bioph Biom*. 36:107–130.  
885 doi:10.1146/annurev.biophys.36.040306.132643.
- 886 Bahadur, R.P., P. Chakrabarti, F. Rodier, and J. Janin. 2003. Dissecting subunit interfaces in  
887 homodimeric proteins. *Proteins Struct Funct Bioinform*. 53:708–719. doi:10.1002/prot.10461.
- 888 Beaven, A.H., A.M. Maer, A.J. Sodt, H. Rui, R.W. Pastor, O.S. Andersen, and W. Im. 2017. Gramicidin  
889 A Channel Formation Induces Local Lipid Redistribution I: Experiment and Simulation. *Biophys J*.  
890 112:1185–1197. doi:10.1016/j.bpj.2017.01.028.
- 891 Bernhardt, N; Faraldo-Gomez, JD; 2021; Membrane Analysis Tools Gromacs;  
892 GitHub; <https://github.com/TMB-CSB/Membrane-Analysis-Tools-Gromacs>. 8ba532b
- 893 Bonomi, M., D. Branduardi, G. Bussi, C. Camilloni, D. Provasi, P. Raiteri, D. Donadio, F. Marinelli, F.  
894 Pietrucci, R.A. Broglia, and M. Parrinello. 2009. PLUMED: A portable plugin for free-energy  
895 calculations with molecular dynamics. *Comput Phys Commun*. 180:1961–1972.  
896 doi:10.1016/j.cpc.2009.05.011.
- 897 Brown, M.F. 2017. Soft Matter in Lipid-Protein Interactions. *Annu Rev Biophys*. 46:379–410.  
898 doi:10.1146/annurev-biophys-070816-033843.
- 899 Brügger, B. 2014. Lipidomics: analysis of the lipid composition of cells and subcellular organelles by  
900 electrospray ionization mass spectrometry. *Annu Rev Biochem*. 83:79–98. doi:10.1146/annurev-  
901 biochem-060713-035324.
- 902 Chadda, R., L. Cliff, M. Brimberry, and J.L. Robertson. 2018. A model-free method for measuring  
903 dimerization free energies of CLC-ec1 in lipid bilayers. *J Gen Physiology*. 150:355–365.  
904 doi:10.1085/jgp.201711893.

- 905 Chadda, R., V. Krishnamani, K. Mersch, J. Wong, M. Brimberry, A. Chadda, L. Kolmakova-Partensky,  
906 L.J. Friedman, J. Gelles, and J.L. Robertson. 2016. The dimerization equilibrium of a ClC Cl(-)/H(+)  
907 antiporter in lipid bilayers. *Elife*. 5:e17438. doi:10.7554/elife.17438.
- 908 Chadda, R., and J.L. Robertson. 2016. Measuring Membrane Protein Dimerization Equilibrium in Lipid  
909 Bilayers by Single-Molecule Fluorescence Microscopy. *Methods Enzymol*. 581:53–82.  
910 doi:10.1016/bs.mie.2016.08.025.
- 911 Cliff, L., R. Chadda, and J.L. Robertson. 2019. Occupancy distributions of membrane proteins in  
912 heterogeneous liposome populations. *Biochimica Et Biophysica Acta Biomembr*. 1862:183033.  
913 doi:10.1016/j.bbamem.2019.183033.
- 914 Corradi, V., E. Mendez-Villuendas, H.I. Ingólfsson, R.-X. Gu, I. Siuda, M.N. Melo, A. Moussatova, L.J.  
915 DeGagné, B.I. Sejdiu, G. Singh, T.A. Wassenaar, K.D. Magnero, S.J. Marrink, and D.P. Tieleman.  
916 2018. Lipid-Protein Interactions Are Unique Fingerprints for Membrane Proteins. *Acs Central Sci*.  
917 4:709–717. doi:10.1021/acscentsci.8b00143.
- 918 Cristian, L., J.D. Lear, and W.F. DeGrado. 2003. Determination of membrane protein stability via  
919 thermodynamic coupling of folding to thiol–disulfide interchange. *Protein Sci*. 12:1732–1740.  
920 doi:10.1110/ps.0378603.
- 921 Dixit, M., and T. Lazaridis. 2020. Free energy of hydrophilic and hydrophobic pores in lipid bilayers by  
922 free energy perturbation of a restraint. *J Chem Phys*. 153:054101. doi:10.1063/5.0016682.
- 923 Dutzler, R., E.B. Campbell, M. Cadene, B.T. Chait, and R. MacKinnon. 2002. X-ray structure of a ClC  
924 chloride channel at 3.0 Å reveals the molecular basis of anion selectivity. *Nature*. 415:287–294.  
925 doi:10.1038/415287a.
- 926 Dutzler, R., E.B. Campbell, and R. MacKinnon. 2003. Gating the Selectivity Filter in ClC Chloride  
927 Channels. *Science*. 300:108–112. doi:10.1126/science.1082708.
- 928 Faraldo-Gómez, J.D., and B. Roux. 2004. Electrostatics of Ion Stabilization in a ClC Chloride Channel  
929 Homologue from *Escherichia coli*. *J Mol Biol*. 339:981–1000. doi:10.1016/j.jmb.2004.04.023.
- 930 Fricke, H. 1925. THE ELECTRIC CAPACITY OF SUSPENSIONS WITH SPECIAL REFERENCE  
931 TO BLOOD. *J Gen Physiology*. 9:137–152. doi:10.1085/jgp.9.2.137.
- 932 Friedman, L.J., and J. Gelles. 2015. Multi-wavelength single-molecule fluorescence analysis of  
933 transcription mechanisms. *Methods San Diego Calif*. 86:27–36. doi:10.1016/j.ymeth.2015.05.026.

- 934 Goforth, R.L., A.K. Chi, D.V. Greathouse, L.L. Providence, R.E. Koeppe, and O.S. Andersen. 2003.  
935 Hydrophobic Coupling of Lipid Bilayer Energetics to Channel Function. *J Gen Physiology*. 121:477–  
936 493. doi:10.1085/jgp.200308797.
- 937 Goodall, M.C. 1971. Thickness dependence in the action of Gramicidin A on lipid bilayers. *Arch*  
938 *Biochem Biophys*. 147:129–135. doi:10.1016/0003-9861(71)90318-3.
- 939 Humphrey, W., A. Dalke, and K. Schulten. 1996. VMD: Visual molecular dynamics. *J Mol Graphics*.  
940 14:33–38. doi:10.1016/0263-7855(96)00018-5.
- 941 Kahraman, O., and C.A. Haselwandter. 2019. Supramolecular organization of membrane proteins with  
942 anisotropic hydrophobic thickness. *Soft Matter*. 15:4301–4310. doi:10.1039/c9sm00358d.
- 943 Kline, S.R. 2006. Reduction and analysis of SANS and USANS data using IGOR Pro. *J Appl*  
944 *Crystallogr*. 39:895–900. doi:10.1107/s0021889806035059.
- 945 Krężel, A., and W. Bal. 2004. A formula for correlating pKa values determined in D2O and H2O. *J*  
946 *Inorg Biochem*. 98:161–166. doi:10.1016/j.jinorgbio.2003.10.001.
- 947 Kučerka, N., M.-P. Nieh, and J. Katsaras. 2011. Fluid phase lipid areas and bilayer thicknesses of  
948 commonly used phosphatidylcholines as a function of temperature. *Biochim Biophys Acta*.  
949 1808:2761–71. doi:10.1016/j.bbamem.2011.07.022.
- 950 Lee, J.C., and S.N. Timasheff. 1981. The stabilization of proteins by sucrose. *J Biological Chem*.  
951 256:7193–201.
- 952 Levental, K.R., E. Malmberg, J.L. Symons, Y.-Y. Fan, R.S. Chapkin, R. Ernst, and I. Levental. 2020.  
953 Lipidomic and biophysical homeostasis of mammalian membranes counteracts dietary lipid  
954 perturbations to maintain cellular fitness. *Nat Commun*. 11:1339. doi:10.1038/s41467-020-15203-1.
- 955 Li, Y., X. Zhang, and D. Cao. 2013. The role of shape complementarity in the protein-protein  
956 interactions. *Sci Rep-uk*. 3:3271. doi:10.1038/srep03271.
- 957 Maduke, M., D.J. Pheasant, and C. Miller. 1999. High-Level Expression, Functional Reconstitution, and  
958 Quaternary Structure of a Prokaryotic Clc-Type Chloride Channel. *J Gen Physiol*. 114:713–722.  
959 doi:10.1085/jgp.114.5.713.
- 960 Marr, A.G., and J.L. Ingraham. 1962. EFFECT OF TEMPERATURE ON THE COMPOSITION OF  
961 FATTY ACIDS IN ESCHERICHIA COLI. *J Bacteriol*. 84:1260–7.
- 962 Marsh, D. 1995. Preferential solvation and the selectivity of lipid-protein interactions. *Biophys J*.  
963 69:1191–1192. doi:10.1016/s0006-3495(95)79993-3.

- 964 Marsh, D. 2008. Protein modulation of lipids, and vice-versa, in membranes. *Biochimica Et Biophysica*  
965 *Acta Bba - Biomembr.* 1778:1545–1575. doi:10.1016/j.bbamem.2008.01.015.
- 966 Meer, G. van, D.R. Voelker, and G.W. Feigenson. 2008. Membrane lipids: where they are and how they  
967 behave. *Nat Rev Mol Cell Biology.* 9:112–24. doi:10.1038/nrm2330.
- 968 Mobashery, N., C. Nielsen, and O.S. Andersen. 1997. The conformational preference of gramicidin  
969 channels is a function of lipid bilayer thickness 1. *Febs Lett.* 412:15–20. doi:10.1016/s0014-  
970 5793(97)00709-6.
- 971 Mondal, S., J.M. Johnston, H. Wang, G. Khelashvili, M. Filizola, and H. Weinstein. 2013. Membrane  
972 Driven Spatial Organization of GPCRs. *Sci Rep-uk.* 3:2909. doi:10.1038/srep02909.
- 973 Mondal, S., G. Khelashvili, and H. Weinstein. 2014. Not Just an Oil Slick: How the Energetics of  
974 Protein-Membrane Interactions Impacts the Function and Organization of Transmembrane Proteins.  
975 *Biophys J.* 106:2305–16. doi:10.1016/j.bpj.2014.04.032.
- 976 Nguiragool, W., and C. Miller. 2007. CLC Cl-/H+ transporters constrained by covalent cross-linking.  
977 *Proc National Acad Sci.* 104:20659–20665. doi:10.1073/pnas.0708639104.
- 978 Pan, J., D. Marquardt, F.A. Heberle, N. Kučerka, and J. Katsaras. 2014. Revisiting the bilayer structures  
979 of fluid phase phosphatidylglycerol lipids: Accounting for exchangeable hydrogens. *Biochim Biophys*  
980 *Acta.* 1838:2966–9. doi:10.1016/j.bbamem.2014.08.009.
- 981 Pearson, L.T., S.I. Chan, B.A. Lewis, and D.M. Engelman. 1983. Pair distribution functions of  
982 bacteriorhodopsin and rhodopsin in model bilayers. *Biophys J.* 43:167–174. doi:10.1016/s0006-  
983 3495(83)84337-9.
- 984 Pencer, J., S. Krueger, C.P. Adams, and J. Katsaras. 2006. Method of separated form factors for  
985 polydisperse vesicles. *J Appl Crystallogr.* 39:293–303. doi:10.1107/s0021889806005255.
- 986 Phillips, R. 2018. Physics of Biological Membranes. *undefined.* 73–105. doi:10.1007/978-3-030-00630-  
987 3\_3.
- 988 Record, M.T., and C.F. Anderson. 1995. Interpretation of preferential interaction coefficients of  
989 nonelectrolytes and of electrolyte ions in terms of a two-domain model. *Biophys J.* 68:786–794.  
990 doi:10.1016/s0006-3495(95)80254-7.
- 991 Robertson, J.L., L. Kolmakova-Partensky, and C. Miller. 2010. Design, function and structure of a  
992 monomeric ClC transporter. *Nature.* 468:844–7. doi:10.1038/nature09556.
- 993 Sanders, C.R., and K.F. Mittendorf. 2011. Tolerance to changes in membrane lipid composition as a  
994 selected trait of membrane proteins. *Biochemistry-us.* 50:7858–67. doi:10.1021/bi2011527.

- 995 Schellman, J.A. 1987. Selective binding and solvent denaturation. *Biopolymers*. 26:549–559.  
996 doi:10.1002/bip.360260408.
- 997 Schellman, J.A. 2003. Protein Stability in Mixed Solvents: A Balance of Contact Interaction and  
998 Excluded Volume. *Biophys J*. 85:108–125. doi:10.1016/s0006-3495(03)74459-2.
- 999 Schindelin, J., I. Arganda-Carreras, E. Frise, V. Kaynig, M. Longair, T. Pietzsch, S. Preibisch, C.  
1000 Rueden, S. Saalfeld, B. Schmid, J.-Y. Tinevez, D.J. White, V. Hartenstein, K. Eliceiri, P. Tomancak,  
1001 and A. Cardona. 2012. Fiji: an open-source platform for biological-image analysis. *Nat Methods*.  
1002 9:676–82. doi:10.1038/nmeth.2019.
- 1003 Schindelin, J., C.T. Rueden, M.C. Hiner, and K.W. Eliceiri. 2015. The ImageJ ecosystem: An open  
1004 platform for biomedical image analysis. *Mol Reprod Dev*. 82:518–29. doi:10.1002/mrd.22489.
- 1005 Scott, H.L., A. Skinkle, E.G. Kelley, M.N. Waxham, I. Levental, and F.A. Heberle. 2019. On the  
1006 Mechanism of Bilayer Separation by Extrusion, or Why Your LUVs Are Not Really Unilamellar.  
1007 *Biophys J*. 117:1381–1386. doi:10.1016/j.bpj.2019.09.006.
- 1008 Sinensky, M. 1974. Homeoviscous Adaptation—A Homeostatic Process that Regulates the Viscosity of  
1009 Membrane Lipids in *Escherichia coli*. *Proc National Acad Sci*. 71:522–525.  
1010 doi:10.1073/pnas.71.2.522.
- 1011 Soubias, O., W.E. Teague, K.G. Hines, and K. Gawrisch. 2015. Rhodopsin/Lipid Hydrophobic  
1012 Matching—Rhodopsin Oligomerization and Function. *Biophys J*. 108:1125–1132.  
1013 doi:10.1016/j.bpj.2015.01.006.
- 1014 Sparr, E., W.L. Ash, P.V. Nazarov, D.T.S. Rijkers, M.A. Hemminga, D.P. Tieleman, and J.A. Killian.  
1015 2005. Self-association of Transmembrane  $\alpha$ -Helices in Model Membranes IMPORTANCE OF  
1016 HELIX ORIENTATION AND ROLE OF HYDROPHOBIC MISMATCH \*. *J Biol Chem*.  
1017 280:39324–39331. doi:10.1074/jbc.m502810200.
- 1018 Tanford, C. 1969. Extension of the theory of linked functions to incorporate the effects of protein  
1019 hydration. *J Mol Biol*. 39:539–544. doi:10.1016/0022-2836(69)90143-0.
- 1020 Tanford, C. 1978. The hydrophobic effect and the organization of living matter. *Science*. 200:1012–  
1021 1018. doi:10.1126/science.653353.
- 1022 Timasheff, S.N. 2002a. Protein-solvent preferential interactions, protein hydration, and the modulation  
1023 of biochemical reactions by solvent components. *Proc National Acad Sci*. 99:9721–9726.  
1024 doi:10.1073/pnas.122225399.



- 1025 Timasheff, S.N. 2002b. Protein Hydration, Thermodynamic Binding, and Preferential Hydration.  
1026 *Biochemistry-us*. 41:13473–13482. doi:10.1021/bi020316e.
- 1027 Valentine, D.L. 2007. Adaptations to energy stress dictate the ecology and evolution of the Archaea. *Nat*  
1028 *Rev Microbiol*. 5:316–323. doi:10.1038/nrmicro1619.
- 1029 Walden, M., A. Accardi, F. Wu, C. Xu, C. Williams, and C. Miller. 2007. Uncoupling and Turnover in a  
1030 Cl<sup>-</sup>/H<sup>+</sup> Exchange Transporter. *J Gen Physiology*. 129:317–329. doi:10.1085/jgp.200709756.
- 1031 Wassenaar, T.A., H.I. Ingólfsson, R.A. Böckmann, D.P. Tieleman, and S.J. Marrink. 2015.  
1032 Computational Lipidomics with insane : A Versatile Tool for Generating Custom Membranes for  
1033 Molecular Simulations. *J Chem Theory Comput*. 11:2144–2155. doi:10.1021/acs.jctc.5b00209.
- 1034 Yan, C., F. Wu, R.L. Jernigan, D. Dobbs, and V. Honavar. 2008. Characterization of Protein–Protein  
1035 Interfaces. *Protein J*. 27:59–70. doi:10.1007/s10930-007-9108-x.
- 1036
- 1037

1038 **FIGURE LEGENDS**

1039 **Figure 1. The CLC-ec1 dimerization reaction in lipid bilayers.** (A) Side view of the CLC-ec1  
1040 homodimer in the lipid bilayer. Two subunits are shown in silver and grey, with helices forming the  
1041 dimerization interface highlighted blue and green. The hydrophobic core of the membrane is depicted in  
1042 yellow. Approximate pathways for Cl<sup>-</sup> and H<sup>+</sup> transport is shown with red arrows. (B) The dimerization  
1043 interface of the monomer. The four helices forming the interface (Q, P, H & I) are shown in green, with  
1044 non-polar side-chains in orange and interfacial polar/charged side-chains in blue. The red dotted line and  
1045 arrows highlights the shorter H & P helices at the center of the interface. (C,D) Top view of dissociated  
1046 and associated end-points of the CLC-ec1 dimerization reaction, with the free energy of dimerization  
1047 defined as  $\Delta G^\circ$ , defined relative to the 1 subunit/lipid mole fraction standard state. Circles represent lipids,  
1048 with orange circles highlighting an example set of lipids that exchange between the dimerization interface  
1049 and the bulk upon dimerization.

1050

1051 **Figure 2. Membrane morphology around CLC-ec1 monomer and dimer from molecular dynamics**  
1052 **simulations.** Results are shown for 2:1 POPE/POPG membranes, averaging 8 independent trajectories of  
1053  $\approx 7.5 \mu\text{s}$  each for the monomer, and 10 trajectories of  $\approx 10 \mu\text{s}$  each for the dimer (**Fig. 2 – source data 1**).  
1054 All simulations are based on the coarse-grained MARTINI force field. (A, B) 3D density maps for the  
1055 ester layers (red) or acyl chains (blue) in the vicinity ( $\leq 10 \text{ \AA}$ ) of the protein (white surface), for (A) the  
1056 monomer and (B) the dimer. In (A), 3 different views of the lipid first-shell are depicted; the 4 helices at  
1057 dimerization interface are highlighted (yellow). (C-E) Spatially resolved grid-based analysis of different  
1058 descriptors of the lipid bilayer structure. See **Fig. 2 – fig. supp. 2** for details. (C) 2D maps of the local  
1059 bilayer thickness across the simulation system. The proteins occupy the central area (white mask). Note  
1060 monomer and dimer are oriented differently relative to the periodic boundaries of the simulation system.  
1061 To facilitate this comparison an axis perpendicular to the dimerization interface (white arrow) is drawn in  
1062 both cases. (D) Variation in the mean lipid tilt-angle across the membrane plane, relative to the bilayer  
1063 perpendicular, for both the outer and inner leaflets. (E) Time-averages of the instantaneous 3D  
1064 conformation of lipid molecules residing at different positions across the membrane plane. Acyl chains  
1065 (gray scale), ester linkages (red), and headgroups (orange/purple) are shown as spheres. Note perfectly  
1066 isotropic dynamics, when time-averaged, results in a linear structure for the entire molecule, perpendicular  
1067 to the membrane mid-plane, and with both acyl chains superposed. These structures are therefore non-  
1068 physical, but they reveal the mean tilt of the lipid molecules across the membrane as well as the degree of

1069 contacts between leaflets. Data is shown for the monomer only (transparent surface), viewed from two  
1070 sides. The 4 helices at the dimerization interface are highlighted (yellow). See **Fig. 2 - fig. supp. 1-3,**  
1071 **source data 1** for additional details.

1072

1073 **Figure 2 – figure supplement 1. Simulation systems and quantification of configurational lipid and**

1074 **protein sampling.** (A) Simulation systems for the CLC-ec1 monomer (left) and dimer (right) in 2:1 POPE

1075 (blue)/POPG (orange) lipid bilayer. The protein is shown as yellow helices, with the dimerization interface

1076 highlighted in magenta. The systems include a total of 2,784 and 2,773 lipid molecules, respectively. (B)

1077 Evaluation of the degree of lipid mixing for the monomer system. For any lipid  $i$ , we quantify, as a function

1078 of simulation time, the percentage of all other lipids  $j$  in the same leaflet that reside for at least 3 ns in a

1079 10-Å shell around lipid  $i$ . Results are shown for a single trajectory (left), and for the average of all

1080 trajectories (right). At any given time, the number of lipids  $j$  in these shells is, on average, about 6. (C)

1081 Evaluation of the protein tilt, relative to the membrane perpendicular ( $Z$ -axis). Data for the isolated

1082 monomer is compared with the monomer in the context of the dimer. The polar plots describe the

1083 magnitude of the tilt in the radial coordinate, contoured in  $1^\circ$  increments; and the  $XY$  direction of tilt in

1084 the angular coordinate, as indicated. These descriptors were evaluated as a function of simulation time for

1085 all trajectories and represented here as probability distributions (color bar). The direction and magnitude

1086 of tilt derive from evaluation of a vector connecting two centers within the protein,  $C_1$  and  $C_2$ , each defined

1087 by a set of backbone beads (324, 327, 332, 361, 370, 413 for  $C_1$ ; and residues 202, 267, 272, 363, 402,

1088 446 for  $C_2$ ), identical for the monomer and dimer systems. In the context of the dimer, the monomer

1089 fluctuates around the membrane perpendicular, as can be expected for a symmetric dimer, preferring a tilt

1090 of  $\approx 4^\circ$ ; when isolated, the preferred tilt increases slightly,  $\approx 7^\circ$ , and the fluctuations are no longer centered

1091 on the membrane perpendicular. In both cases, the probability distributions appear to be fully defined,

1092 indicating near complete sampling of the accessible orientation space.

1093

1094 **Figure 2 – figure supplement 2. Schematic of different descriptors of lipid-bilayer structure.** (A)

1095 Composition of membranes simulated in this study. All simulations maintain a 2:1 PE/PG ratio for the

1096 lipid headgroups, while varying the DL/PO acyl chain composition. The coarse-grained particles or beads

1097 used to represent each lipid molecule are shown as spheres. Analysis is typically performed for each leaflet

1098 (outer vs. inner) unless otherwise noted. For each simulation snapshot and each trajectory, a one-to-one

1099 assignment of each lipid molecule (or specific groups therein) to a point in a 2-dimensional grid on the

1100 membrane XY plane is made. For each lipid, the descriptor of interest is calculated on the basis of the 3D  
1101 coordinates of the system in that snapshot/trajectory, and assigned to the corresponding grid-point. Finally,  
1102 all values mapped onto each grid point are averaged for all snapshots/trajectories, and represented as a  
1103 color-coded 2D map. (B) To calculate the membrane thickness, the mean Z-coordinate of either the  
1104 phosphate or the ester layer is calculated for each leaflet, and mapped onto 2D grids as mentioned above;  
1105 the mean Z-coordinate map for the inner leaflet is then subtracted from that of the outer leaflet, in the  
1106 regions of the grid where both are defined. (C) Acyl chain end-to-end distance,  $d_{ester-Cn}$ , where  $n$  represents  
1107 the last bead in the acyl chain ( $n = 4$  for PO lipids). (D) Lipid tilt angle,  $\Theta_i$ , for each chain  $i$  relative to the  
1108 membrane normal (Z-axis). (E) Mean order parameter calculated along all acyl chain bond angles,  $\Theta_{ij}$ ,  
1109 across chain  $i$  and bond  $j$ . (F) The average lipid structure for a point on the 2D grid is calculated by  
1110 averaging the 3D coordinates of the lipid molecules assigned to that point. (G) To evaluate the number of  
1111 nearest neighbors  $j$  for a given lipid  $i$ , a set of geometric centers are defined for either the headgroup, ester  
1112 groups, or acyl chains in both  $i$  and  $j$ . Lipid  $j$  is considered to be a neighbor of  $i$  if the distance between  
1113 the respective centers is 15 Å or less. (H) The degree of hydration is quantified for each lipid molecule,  
1114 either for the ester layer or the acyl chains, as the total number of lipid-water contacts where a contact is  
1115 counted if the CG water is within 8 Å of a bead in the selected group. (I) To rank the degree of  
1116 interdigitation of a given acyl chain  $i$  with all other lipids  $j$  in the opposing leaflet, the beads in  $j$  are  
1117 indexed as indicated, and those within 6 Å of the last bead in  $i$  (marked by asterisk) are identified; the rank  
1118 averaged over these contacts and time is reported. (J) Interleaflet contacts are the total number of contacts  
1119 formed between each acyl chain  $I$  and beads in any chain  $j$  in the opposing leaflet where a contact requires  
1120 the beads be within 6 Å of each other.

1121

1122 **Figure 2 – figure supplement 3. Membrane morphology around CLC-ec1 monomer and dimer from**  
1123 **molecular dynamics simulations.** Note monomer and dimer are oriented differently. To facilitate this  
1124 comparison an axis perpendicular to the dimerization interface (white arrow) is drawn in both cases. (A)  
1125 Variation in the end-to-end distance in the lipid acyl chains across the simulation system, for both outer  
1126 and inner leaflet. (B) Variation in the second-rank order parameter,  $P_2$ , of the coarse-grained C-C bonds  
1127 in the acyl chains. The  $P_2$  parameter of a given C-C bond is defined as  $1/2 (3 \cos^2 \langle \theta \rangle - 1)$ , where  $\langle \theta \rangle$   
1128 denotes the ensemble-average value of the angle formed by the bond and the bilayer perpendicular (Z-  
1129 axis). The plots show the mean value of  $P_2$  for the three C-C bonds in the PO lipids, mapped across the

1130 system. (C) Interdigitation rank for the acyl chains in one leaflet with the acyl chains in the opposing  
1131 leaflet. See **Figure 2 – fig. supp. 2** for further details.

1132

1133 **Figure 3. Physical properties of 2:1 PE/PG membranes with mixed PO/DL acyl chains.** (A) Chemical  
1134 structures of lipids POPE, POPG, DLPE and DLPG. (B) Differential scanning calorimetry (DSC)  
1135 thermograms of PO/DL mixed membranes in the multilamellar vesicle state. Dotted line marks  
1136 approximate ambient room temperature (RT) of 22 °C. (C) Peak phase transition temperature,  $T_m$ , as a  
1137 function of DL (%). Dotted line indicates RT. (D) Multilamellar spherical form factors for small (orange)  
1138 and large (blue) vesicle populations based on size. Both form factors are constant for  $q > 0.015 \text{ \AA}^{-1}$ . (E)  
1139 SANS spectra as a function of DL (%) at 25 °C from 100 nm extruded vesicles. Spectra are offset from  
1140 the 0% condition for visualization. Solid lines represent best fit of the  $q > 0.015 \text{ \AA}^{-1}$  regions using the  
1141 multilamellar form factor model. The broad shoulder at  $q \approx 0.06 - 0.7$  is due to the presence of a small  
1142 population of multi-lamellar vesicles. (F) Bilayer thickness ( $d_B$ ) as a function of DL (%), white circles).  
1143 Reference SANS data is shown for PC (solid circle, (Kučerka et al., 2011)) and PG (solid square, (Pan et  
1144 al., 2014)). (G) Change in bilayer thickness as function of DL% from coarse-grained molecular dynamics  
1145 simulations of pure PO/DL 2:1 PE/PG membranes, calculated as the average separation between either  
1146 the phosphate layers or the ester layers. Data is shown for a calculation that considers either all lipids  
1147 (black), or only PO lipids (red), or only DL lipids (blue). (H) Average number of contacts formed between  
1148 each of the acyl chains of given lipid (either both PO and DL, black; or PO only, red; or DL only, blue)  
1149 and any other acyl chain in the opposing leaflet, for the same bilayers examined in (G). See **Fig. 3 –**  
1150 **source data 1 & 2** for additional information.

1151

1152 **Figure 4. CLC-ec1 dimerization in 2:1 PE/PG membranes with 20% DL and 80% PO acyl chains.**  
1153 (A) Liposome size distribution of 20% DL liposomes (orange histogram), extruded through 400 nm filters  
1154 and imaged by cryo-electron microscopy (inset). Black line shows mean  $\pm$  standard deviation distribution  
1155 of 400 nm extruded 2:1 POPE/POPG vesicles (Cliff et al., 2019). (B) Distribution of the fractional surface  
1156 area of each liposome composition. (C) Cumulative fractional surface area distributions show that  
1157 populations are not significantly different (Kolmogorov-Smirnov test,  $P = 0.08$ ,  $D = 0.26$ ). (D) Total  
1158 internal reflection fluorescence microscopy image of 2:1 PE/PG liposomes with 20% DL containing CLC-  
1159 ec1-Cy5 reconstituted at  $\chi_{\text{protein}} = 1 \times 10^{-6}$  subunits/lipid ( $\rho = 0.1 \mu\text{g}/\text{mg}$ ). Scale bar represents 4  $\mu\text{m}$ . (E)  
1160 Representative integrated intensity photobleaching traces of WT CLC-ec1-Cy5 in 0% and 20% DL

1161 membranes. (F) Photobleaching probabilities ( $P_1, P_2, P_{3+}$ ) of monomeric control I201W/I422W-Cy5 (WW,  
1162 white circles,  $n = 2-3$ ), dimeric control R230C/L249C-Cy5 (RCLC-Cy5, black circles,  $n = 2-3$ ), and WT  
1163 CLC-ec1-Cy5 in 20% DL (orange circles,  $n = 2-5$ ), 400 nm extruded liposomes. Data represent mean  $\pm$   
1164 sem for the reactive protein/lipid mole fraction  $\chi^*$  (x-axis) and photobleaching probabilities (y-axis). (G)  
1165 CLC-ec1 dimerization isotherm in 20% DL (orange,  $K_{D,20\%DL} > (4.2 \pm 1.3) \times 10^{-6}$  subunits/lipid,  $\Delta G^\circ = -$   
1166  $7.4 \pm 0.2$  kcal/mole,  $R^2 = 0.53$ , 1 subunit/lipid standard state) compared to previously published 0% DL  
1167 (black,  $K_{D,0\%DL} = (2.5 \pm 0.4) \times 10^{-8}$  subunits/lipid,  $\Delta G^\circ = -10.4 \pm 0.1$  kcal/mole,  $R^2 = 0.92$  from Chadda  
1168 et al., JGP 2018), resulting in  $\Delta\Delta G > +3.0 \pm 0.2$  kcal/mole. (H) Fusion experiment showing the change in  
1169 the photobleaching distribution of  $\chi_{\text{protein}} = 2 \times 10^{-6}$  subunits/lipid CLC-ec1-Cy5 in 0% DL membranes  
1170 when diluted 1:1 by fusion with 0% DL or 40% DL, for final 20% DL and  $\chi_{\text{protein}} = 1 \times 10^{-6}$  subunits/lipid  
1171 conditions. (I) Chloride transport function for WT-Cy5 CLC-ec1 at  $\chi_{\text{protein}} = 1 \times 10^{-5}$  subunits/lipid ( $\rho = 1$   
1172  $\mu\text{g}/\text{mg}$ ) in 0% (black) and 20% DL (orange). Efflux is initiated by addition of valinomycin/FCCP (^) and  
1173 the remaining trapped chloride is released by addition of  $\beta$ -OG (v). (J) Summary of the fractional volume  
1174 of inactive vesicles  $F_{0,\text{vol}}$  and (K) CLC dependent chloride efflux rate,  $k_p$ , over the 0% and 20% DL  
1175 conditions. For the studies shown here, statistical analysis was calculated using a two-tailed unpaired  
1176 parametric student's t-test on  $P_1$ ,  $F_{0,\text{vol}}$  or  $k_p$  data (\*,  $P \leq 0.05$ ; \*\*,  $P \leq 0.01$ ). See **Fig. 4 – fig. supp. 1,**  
1177 **source data 1-6.**

1178

1179 **Figure 4 – figure supplement 1. Additional analysis of CLC-ec1 assembly in membranes as a**  
1180 **function of DL percentage in 2:1 PE/PG membranes.** Photobleaching probability distributions  
1181 ( $P_1, P_2, P_{3+}$ ) for (A) WW-Cy5 monomeric control and (B) dimeric control RCLC-Cy5 in 2:1 PE/PG, 400  
1182 nm extruded liposomes with 0% DL (black circles) vs. 20% DL (white circles). (C,D) Photobleaching  
1183 probabilities,  $P_1$  and  $P_2$ , for the in-membrane dilution by freeze-thaw fusion of 0.2  $\mu\text{g}/\text{mg}$  vesicles in 0%  
1184 DL membranes (black circles) with either 0% DL (negative control, white circles) or 40% DL membranes  
1185 for a final DL composition of 20% (orange circles), measured at (C)  $4.7 \pm 0.7$  days and (D)  $14.3 \pm 0.3$   
1186 days after freeze/thaw fusion and incubation at room temperature in dark conditions. (E) Comparison of  
1187 dialyzing 0% DL samples in the absence (- DL) or presence (+ DL) of high DL samples (> 20% DL) in  
1188 the same dialysis bucket (mean  $\pm$  sem,  $n = 3$ ). Statistical significance calculated using a two-tailed  
1189 unpaired parametric student's t-test (\*,  $P < .05$ ).

1190



1191 **Figure 5. CLC-ec1 dimerization depends on DL in 2 phases.** (A) Photobleaching probability  
1192 distributions of  $\chi_{\text{protein}} = 1 \times 10^{-6}$  subunits CLC-ec1-Cy5 per lipid as a function of % DL ( $n_{0\% \text{ DL}} = 9$ ;  $n_{1\text{E}-8}$   
1193 to 80% DL = 3 - 5;  $n_{\text{WW-Cy5}, 0\% \text{ DL}} = 2$  (Chadda et al., 2016)). Data is represented as mean  $\pm$  sem. Statistical  
1194 analysis calculated using a two-tailed unpaired parametric student's t-test on  $P_I$  data (\*,  $P \leq 0.05$ ; \*\*,  $P \leq$   
1195 0.01; \*\*\*,  $P \leq 0.001$ ; \*\*\*\*,  $P \leq 0.0001$ ). For additional statistical information, see **Fig. 5 - source data 1**.  
1196 (B) Fraction of dimer,  $F_{\text{dimer},0}$ , calculated by least-squares fitting of WT-Cy5 distributions to WW-Cy5  
1197 and RCLC-Cy5 monomer and dimer controls. The subscript, “0”, indicates that the 0% DL control  
1198 distributions were used. Data was fit to a single exponential decay,  $F_{\text{dimer},0} = F(0)e^{-\lambda(DL)}$  (black,  
1199 dashed,  $\lambda = 0.13 \pm 0.04$ ,  $R^2 = 0.48$ ) and two-phase exponential decay,  $F_{\text{dimer},0} = F(0)(F_1 e^{-\lambda_1(DL)} +$   
1200  $(1 - F_1)e^{-\lambda_2(DL)})$  (orange,  $\lambda_1 = (1.71 \pm 2.66) \times 10^6$ ,  $F_1 = 27.23 \pm 4.27$ ,  $\lambda_2 = 0.09 \pm 0.03$ ,  $R^2 = 0.64$ ), where  
1201  $F(0) = 0.86$ , the mean value at 0% DL. The inset shows that the two-phase exponential decay is required  
1202 for fitting < 1% DL data. (C) Normalized change in bilayer thickness ( $\Delta d_B$ , black) from SANS  
1203 measurements, compared to normalized fraction of dimers ( $\Delta F_{\text{dimer},0}$ , white) and chloride transport rate  
1204 ( $\Delta k_P$ , blue) as a function of % DL. Fits are single exponential decays for  $\Delta d_B$ :  $\lambda = 0.023 \pm 0.003$ ,  $R^2 =$   
1205 0.94 (black),  $\Delta k_P$ :  $\lambda = 0.025 \pm 0.005$ ,  $R^2 = 0.59$  (blue), and a two-phase exponential decay for  $\Delta F_{\text{dimer},0}$   
1206 (orange, same fit parameters as above), with the y-intercept set to 1. Complete analysis of functional data  
1207 is shown in **Fig. 5 – fig. supp. 1**. (D)  $\Delta\Delta G$  vs. % DL for data > 1% DL. Line represents linear regression  
1208 analysis with 95% confidence intervals (slope =  $0.078 \pm 0.029$ , y-intercept =  $1.65 \pm 0.27$ , best-fit  $\pm$   
1209 standard error,  $R^2 = 0.38$ ). (E)  $\Delta\Delta G$  vs.  $\text{Log}_{10}(\text{DL})$  for data < 1% DL. Line represents linear regression  
1210 analysis with 95% confidence intervals (slope =  $0.135 \pm 0.072$ , y-intercept =  $1.61 \pm 0.33$ , best-fit  $\pm$   
1211 standard error,  $R^2 = 0.09$ ). See **Fig. 5 – fig. supp. 1, source data 1-3**.

1212

1213 **Figure 5 – figure supplement 1. Chloride transport activity as a function of DL titration.** (A) Raw  
1214 traces of chloride transport function in 2:1 PE/PG vesicles containing different proportions of DL vs. PO.  
1215 Valinomycin initiated chloride efflux ( $\wedge$ ), and addition of  $\beta$ -OG detergent to dissolve inactive vesicles and  
1216 release the remaining chloride into solution ( $\vee$ ) are marked as shown. Protein was reconstituted at  $\chi_{\text{protein}}$   
1217 =  $1 \times 10^{-5}$  subunits/lipid ( $\rho = 1 \mu\text{g}$  CLC-ec1 per mg lipids). (B) Representative chloride leak traces from  
1218 empty vesicles with 0% (black) and 20% DL composition (orange). Leak rates in normalized  $\text{Cl}^-/\text{s}$   
1219 measured by fitting to exponential association,  $k_{\text{leak}}$ , or initial slope,  $k_{\text{init}}$ : 0% DL -  $k_{\text{leak}} = 0.0004 \pm 0.0002$ ,  
1220  $k_{\text{init}} = 0.0006 \pm 0.0009$  ( $n_{\text{rep.}} = 3$ ); 20% DL -  $k_{\text{leak}} = 0.0004 \pm 0.0003$ ,  $k_{\text{init}} = 0.0005 \pm 0.0005$  ( $n_{\text{rep.}} = 4$ );  
1221 50% DL:  $k_{\text{leak}} = 0.0012 \pm 0.0010$ ,  $k_{\text{init}} = 0.0011 \pm 0.0010$  ( $n_{\text{rep.}} = 4$ ); data represented as mean  $\pm$  standard

1222 deviation,  $n_{\text{rep}}$ . – measurement replicates from a single sample. (C) Chloride transport rate,  $k_{\text{init}}$ . (blue) or  
1223  $k_P$  (orange), in normalized Cl<sup>-</sup>/second, mean  $\pm$  sem,  $n = 3$ -5 independent samples. Dashed lines represent  
1224 fits to a single exponential decay,  $k = y_0 e^{-\lambda(DL)}$ :  $k_{\text{init}} - y_0 = 0.021 \pm 0.001$ ,  $\lambda = 0.034 \pm 0.024$ ,  $R^2 = 0.78$ ;  
1225  $k_P - y_0 = 0.027 \pm 0.002$ ,  $\lambda = 0.024 \pm 0.036$ ,  $R^2 = 0.59$ . Statistical analysis calculated using a two-tailed  
1226 unpaired parametric student's t-test (\*,  $P \leq 0.05$ ; \*\*,  $P \leq 0.01$ ; \*\*\*,  $P \leq 0.001$ ; \*\*\*\*,  $P \leq 0.0001$ ). (D)  
1227 Fractional volume of active vesicles,  $1 - F_{0,\text{vol}}$ . Dashed line represents fits to a single exponential decay,  
1228  $1 - F_{0,\text{vol}} = y_0 e^{-\lambda(DL)}$ :  $y_0 = 0.88 \pm 0.05$ ,  $\lambda = 0.007 \pm 0.003$ ,  $R^2 = 0.14$ . (E) Plot of the normalized change  
1229 in bilayer thickness,  $\Delta d_B$  (black), and transport rates,  $\Delta k_P$  (orange) and  $\Delta k_{\text{init}}$  (blue). Lines represent fits to  
1230 exponential decays with  $y_0=1$ :  $\Delta d_B$ :  $\lambda = 0.024 \pm 0.003$ ,  $R^2 = 0.94$ ;  $\Delta k_P$ :  $\lambda = 0.023 \pm 0.005$ ,  $R^2 = 0.58$ ;  $\Delta k_{\text{init}}$ :  
1231  $\lambda = 0.032 \pm 0.004$ ,  $R^2 = 0.77$ .

1232

1233 **Figure 6. Preferential DL solvation of the CLC-ec1 dimerization interface in mixed PO/DL**  
1234 **membranes.** Data are shown for 2:1 POPE/POPG membranes with varied proportions of 2:1  
1235 DLPE:DLPG, namely 1%, 10%, 30% and 50%. For each composition, the results presented are averages  
1236 of 8 independent trajectories of 6-10  $\mu\text{s}$  each (**Fig. 2 – source data 1**) (A) 2D maps of the bilayer thickness  
1237 analogous to that shown in **Fig. 2C** for a membrane with no DL. (B) For the 50% DL condition, time-  
1238 averaged lipid conformations, represented identically to **Fig. 2E**. PO and DL lipids are analyzed  
1239 separately. (C) For the 50% DL condition, 3D density maps for the ester layers (red) or acyl chains (blue)  
1240 in the vicinity ( $\leq 10 \text{ \AA}$ ) of the protein (white surface), represented identically to those in **Fig. 2A**. PO and  
1241 DL lipids are analyzed separately. (D) Enrichment or depletion of DL lipids across the membrane, relative  
1242 to the preset proportions of PO and DL lipids, quantified by the percent difference between the observed  
1243 2D lipid density ratio (DL/PO) and what would be expected for a uniform distribution and the bulk ratio.  
1244 Positive values reflect enrichment while negative values reflect depletion. Each leaflet is examined  
1245 separately. (E) The results shown in panel (D) are summarized by integrating the data over lipid-solvation  
1246 shells of increasing width and combining the outer and inner leaflets. Independent profiles are calculated  
1247 for the dimerization interface and for the other two protein-lipid interfaces. Error bars reflect the standard  
1248 deviation of the data across independent trajectories.

1249

1250 **Figure 6 – figure supplement 1. Lipid-solvation of the CLC-ec1 monomer in CGMD simulations**  
1251 **with PO/DL membranes.** (A) Snapshots of simulation systems used to examine the 10% DL (left) and  
1252 50% DL conditions. The molecular systems are represented as in **Fig. 2 – fig. supp. 1A**. We also examined

1253 the 1% and 30% conditions (see **Fig. 2 – source data 1** for details). (B) Quantification of the degree of  
1254 lipid mixing observed for the 50% DL condition, evaluated and represented as in **Fig. 2 – fig. supp. 1B**.

1255

1256 **Figure 6 – figure supplement 2. Lipid tilt around the CLC-ec1 monomer and dimer from molecular**  
1257 **dynamics simulations.** Note monomer and dimer are oriented differently. To facilitate this comparison  
1258 an axis perpendicular to the dimerization interface (white arrow) is drawn in both cases. Variation in the  
1259 mean lipid tilt angle across the membrane, relative to its perpendicular, for both the CLC-ec1 dimer and  
1260 monomer in 2:1 POPE/POPG, i.e. 100% PO; and for the monomer in 50% DL/50% PO membranes. Data  
1261 are shown for each of the bilayer leaflets. For the PO/DL membrane, the mean tilt analysis evaluates either  
1262 both lipid types, PO lipids only, or DL lipids only.

1263

1264 **Figure 7. DL enrichment of membrane defect partially restores native-like properties.** (A) Analysis  
1265 of the average number of contacts formed by each of the acyl chains of a given lipid (either both PO and  
1266 DL, PO only, or DL only) and any other acyl chain in the opposing leaflet. The results are mapped across  
1267 the membrane plane, for either the CLC-ec1 dimer or the monomer, in either 100 PO or 50/50 PO/DL.  
1268 This is the same quantity reported in **Fig. 3H** for the pure PO/DL bilayers, but here it is mapped in 2D,  
1269 and is calculated with the protein present. Note the number of contacts formed by DL lipids at the defect  
1270 induced by monomeric CLC-ec1 approximately matches the bulk values for 100 PO or 50/50 PO/DL  
1271 (regions of map in gray); by contrast, PO lipids exceed the bulk quantity. (B) Analysis of the 2D lipid  
1272 density, at the level of either the headgroups, the ester layers, or the acyl chains, in terms of the number  
1273 of lipid neighbors within 15 Å. Results are shown for each leaflet separately, for either the CLC-ec1 dimer  
1274 or monomer, and in either 100 PO or 50/50 PO/DL. Note the density defect created by monomeric CLC-  
1275 ec1 in the headgroup and ester layers in the 100 PO condition, and how this defect is minimized through  
1276 enrichment in DL lipids. (C) Analysis of the extent of water penetration of the acyl-chain interior of the  
1277 bilayer, for either the dimer or monomer and either the 100 PO or 50/50 PO/DL condition. Consistent with  
1278 the lipid density analysis, the degree of water penetration into the bilayer interior in the 100 PO condition  
1279 is much greater in the defect at the dimerization interface in monomeric CLC-ec1 than anywhere else in  
1280 the membrane; this perturbation is diminished by DL enrichment.

1281

1282

1283

1284  
1285

Figure 1

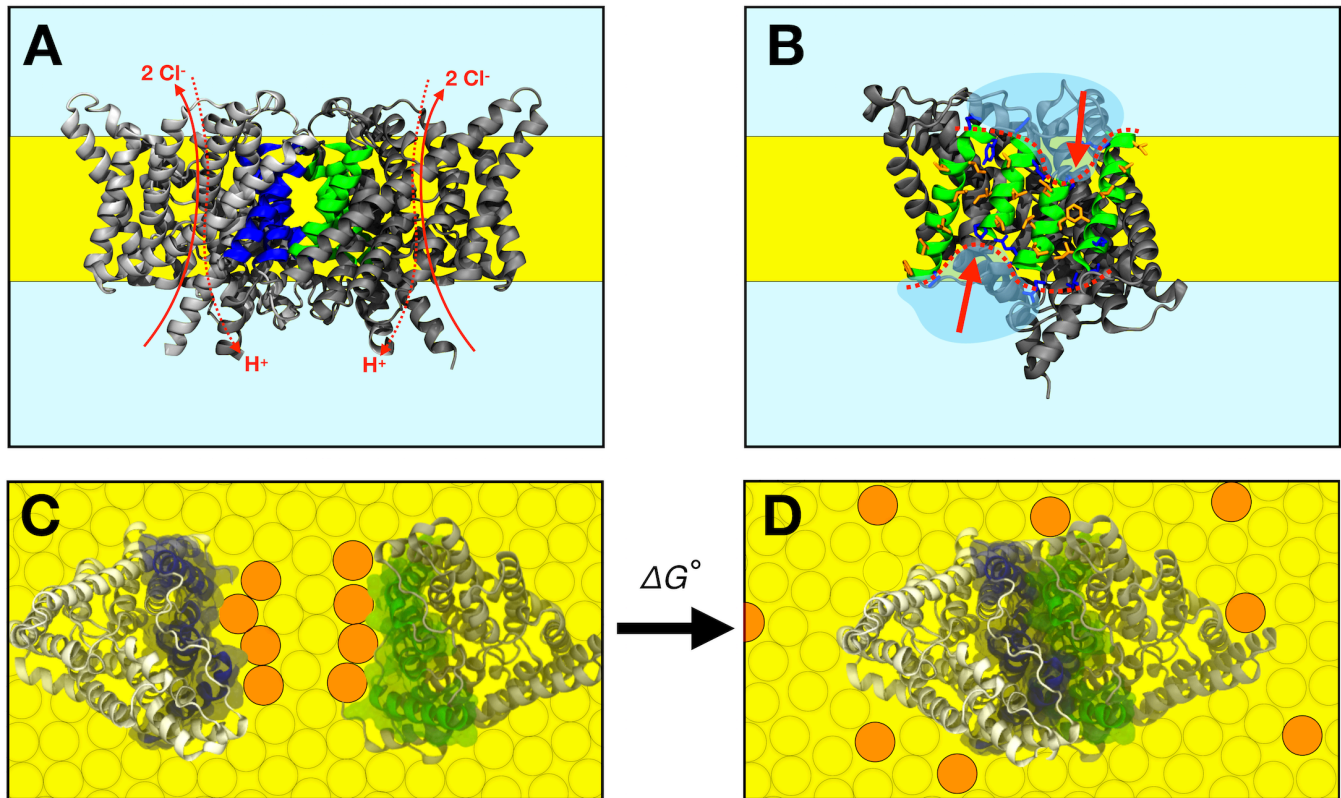

1286  
1287  
1288  
1289  
1290  
1291  
1292  
1293  
1294  
1295  
1296  
1297  
1298  
1299  
1300  
1301  
1302  
1303  
1304  
1305  
1306  
1307

1308  
1309  
1310

**Figure 2**

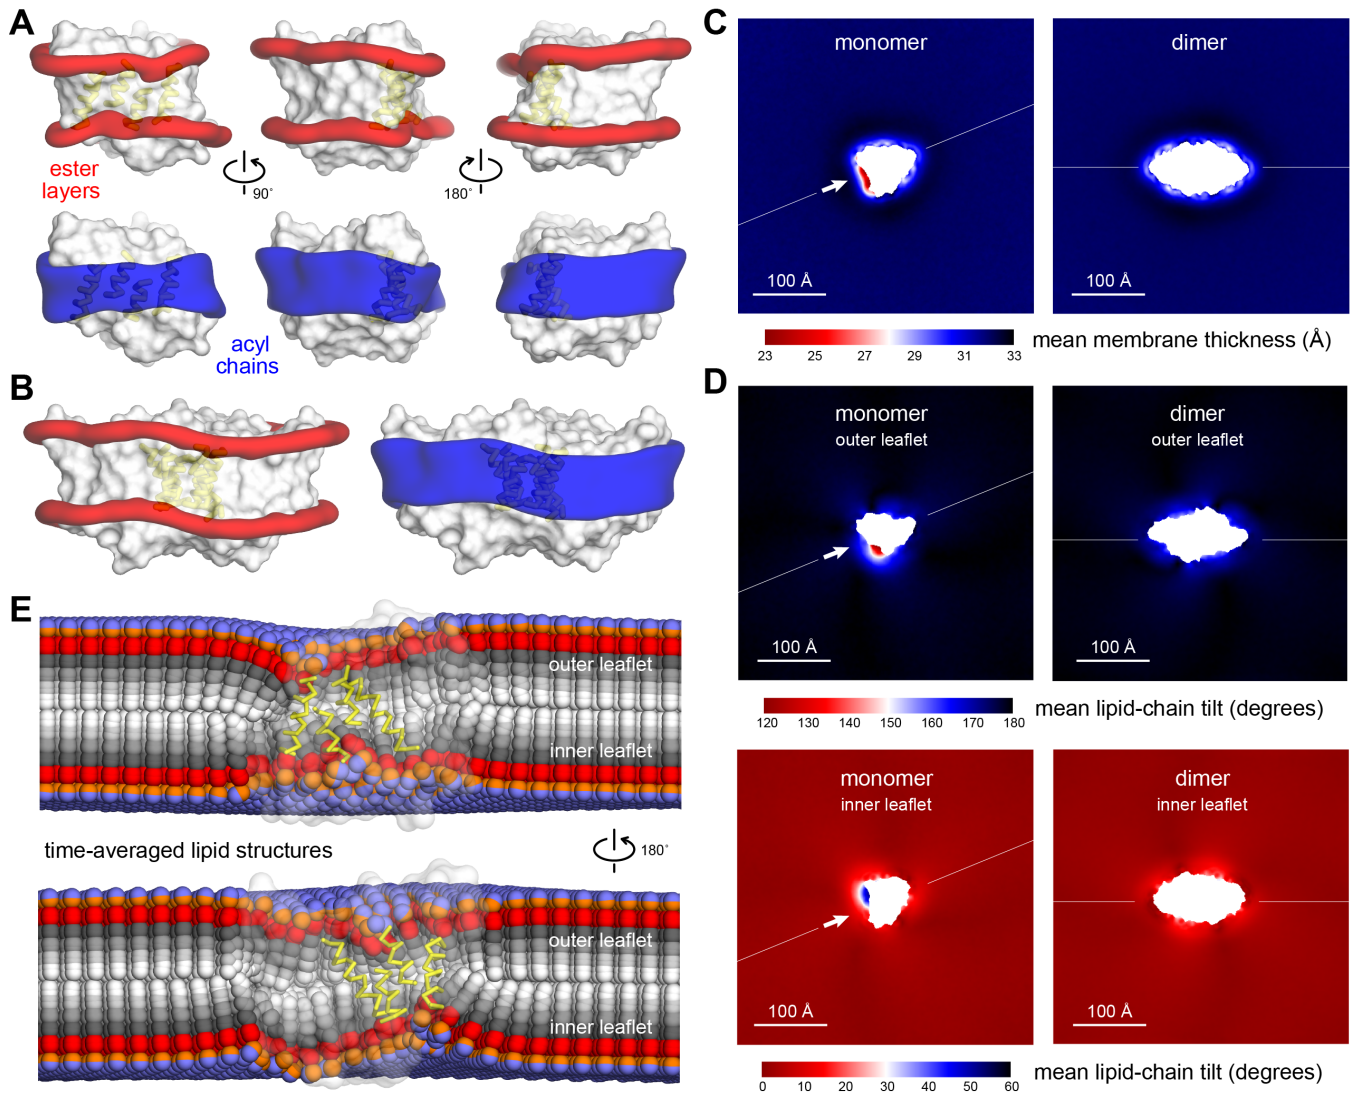

1311



1312  
1313

**Figure 2 – figure supplement 1**

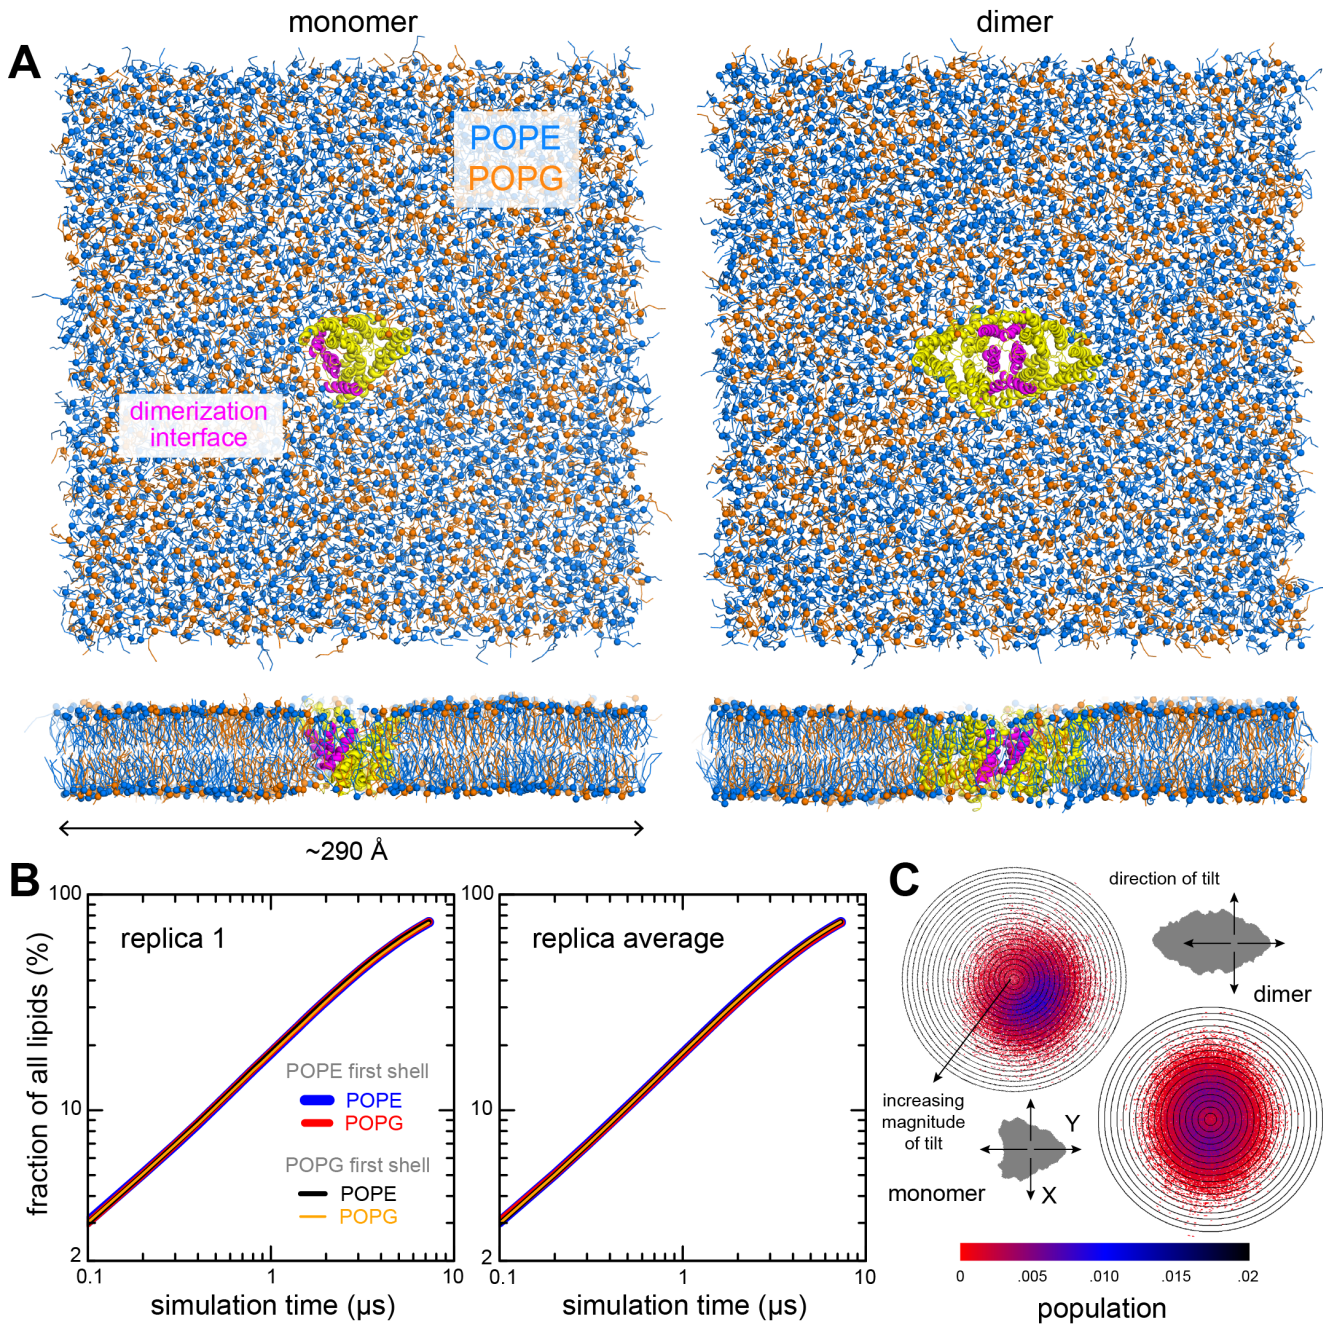

1314  
1315  
1316  
1317  
1318  
1319  
1320  
1321  
1322



1323  
1324  
1325

Figure 2 – figure supplement 2

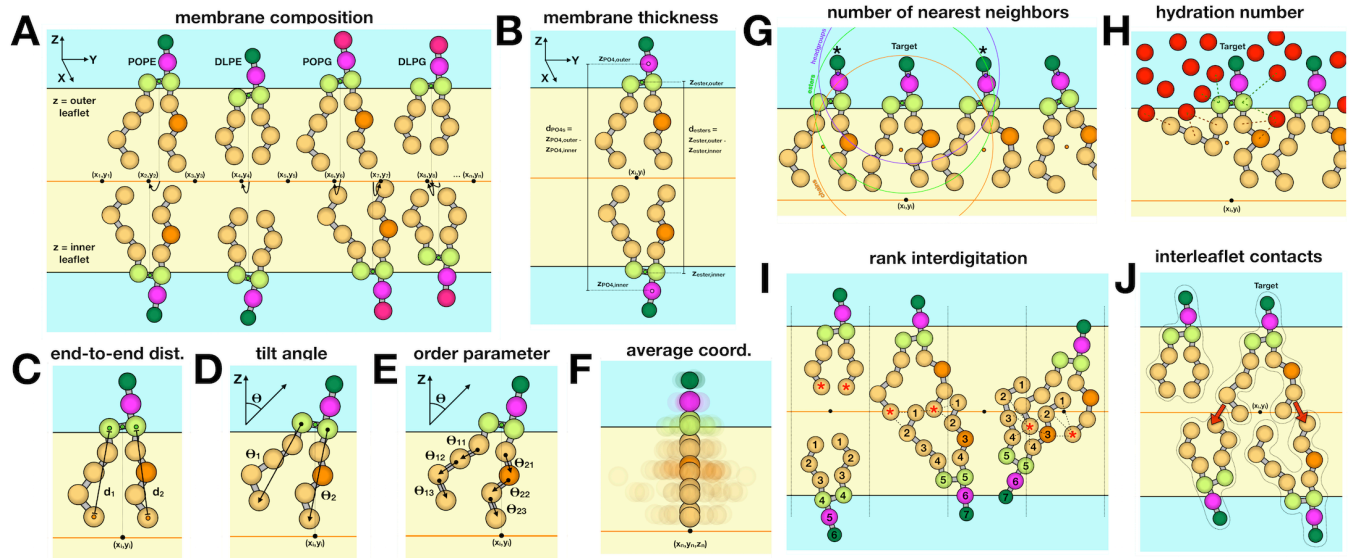

1326  
1327  
1328  
1329  
1330  
1331

1332  
1333  
1334  
1335  
1336

Figure 2 – figure supplement 3

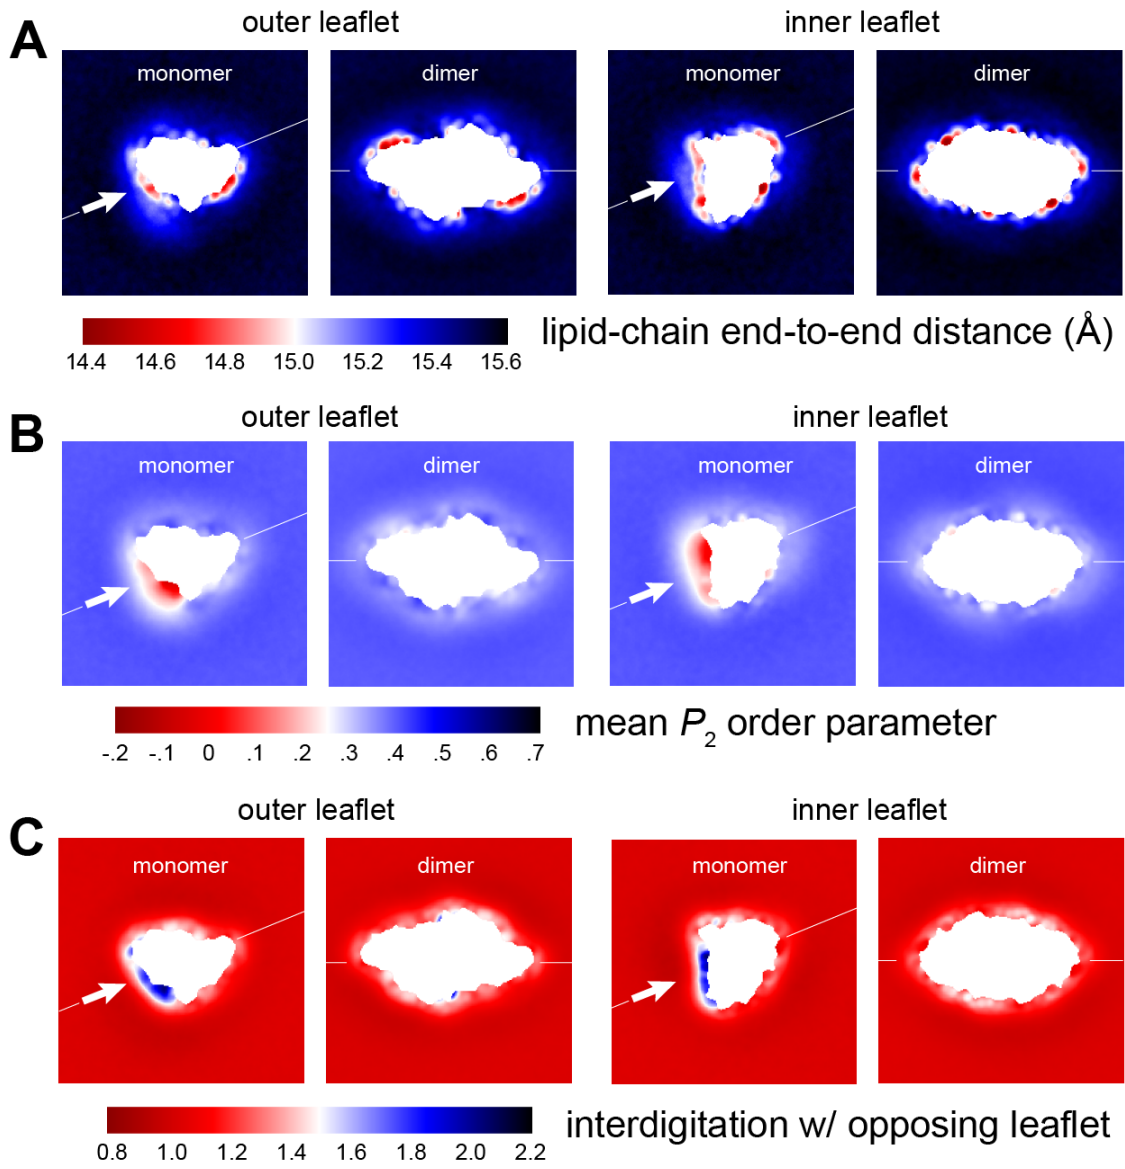

1337  
1338

**Figure 3**

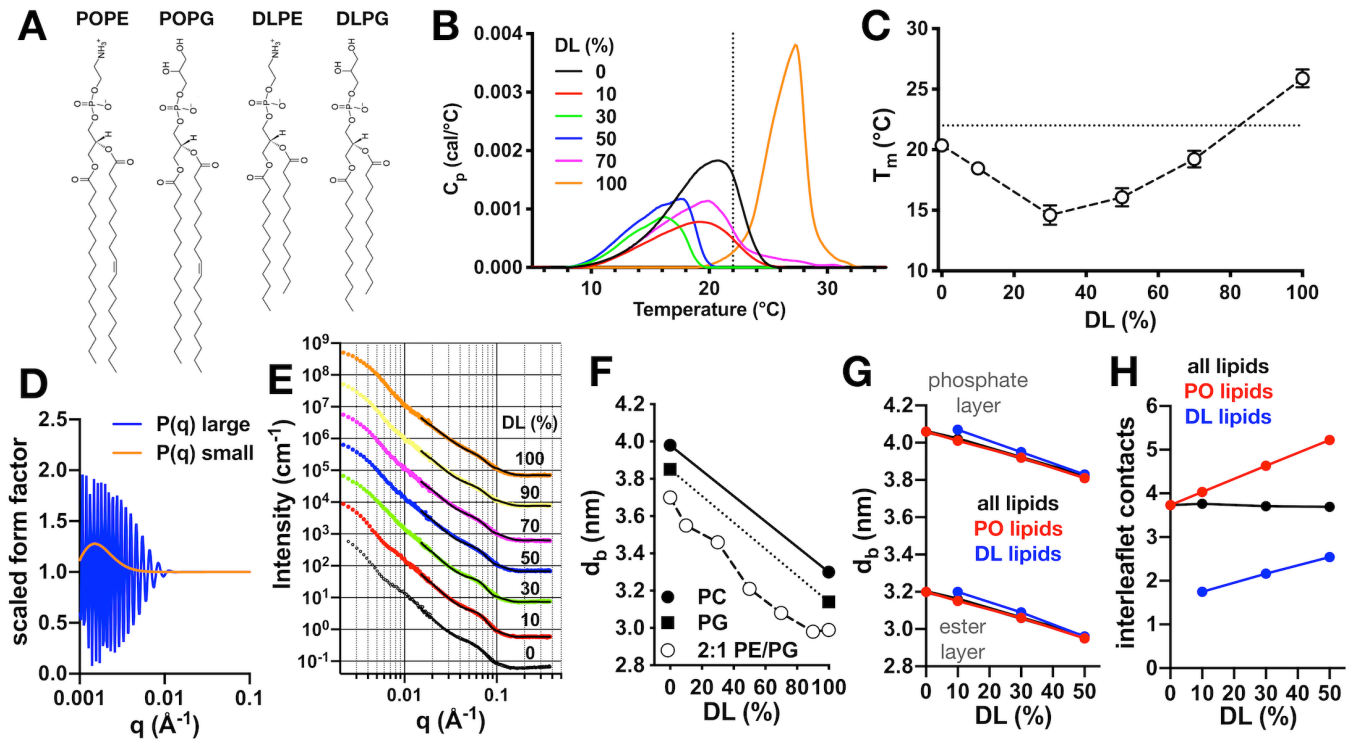

1339  
1340  
1341  
1342  
1343

1344  
1345

Figure 4

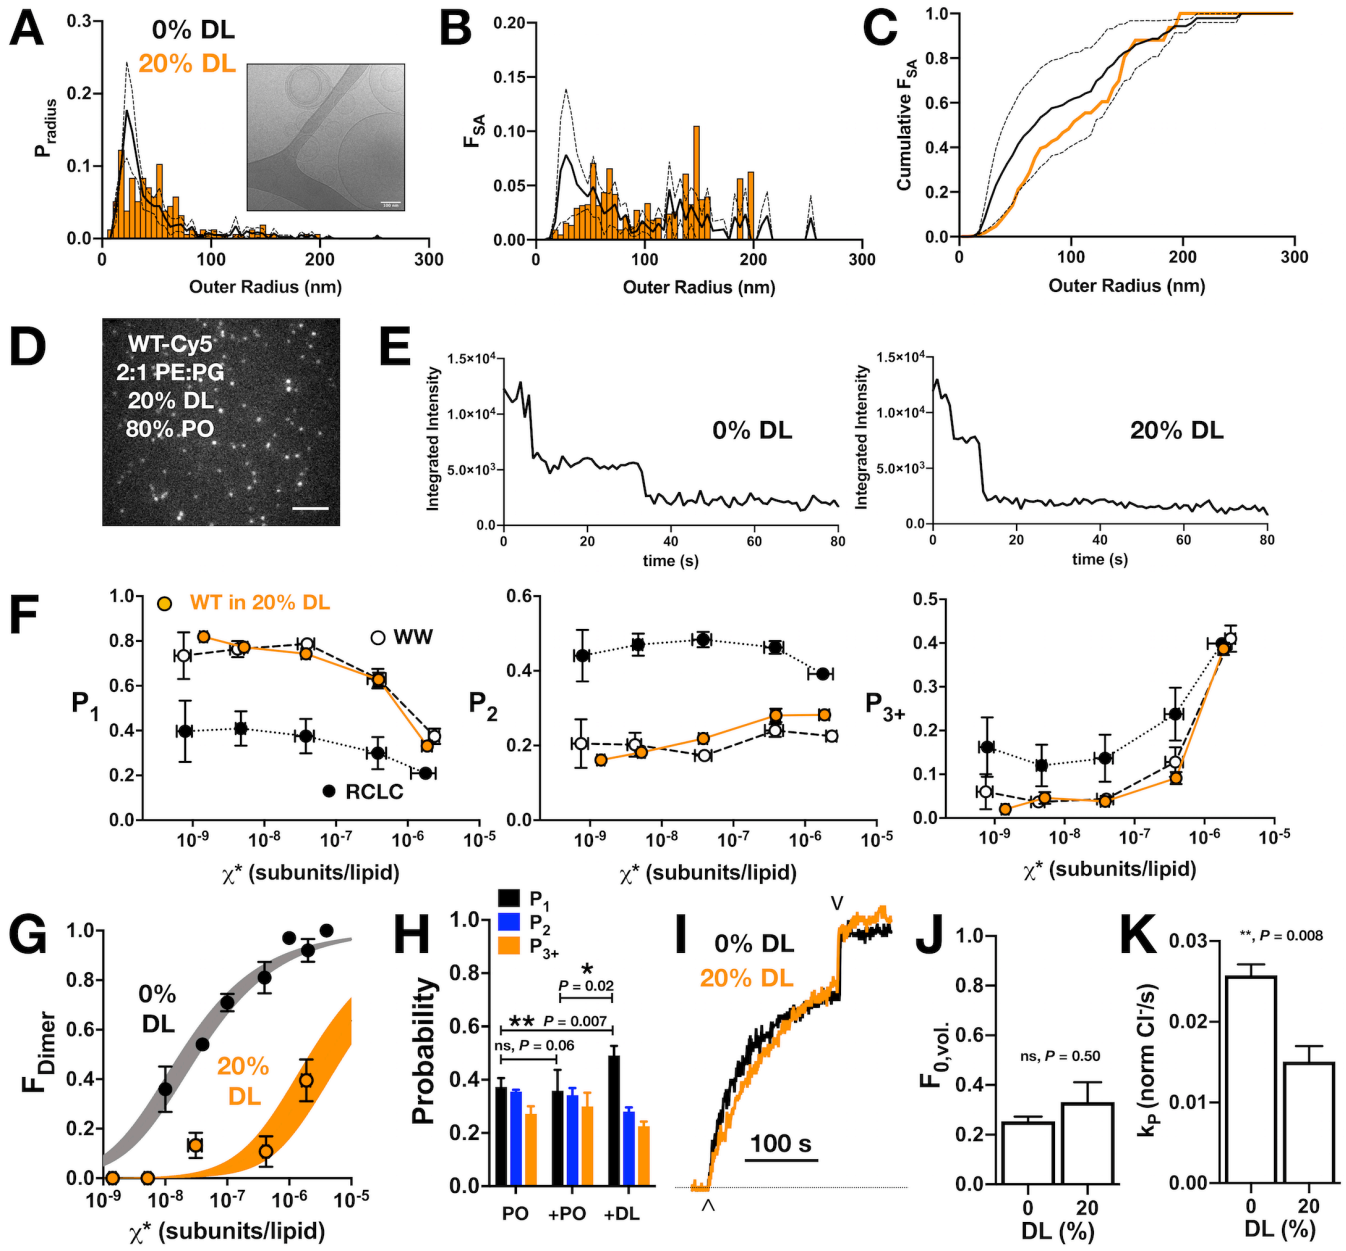

1346  
1347  
1348

1349  
1350

Figure 4 – figure supplement 1

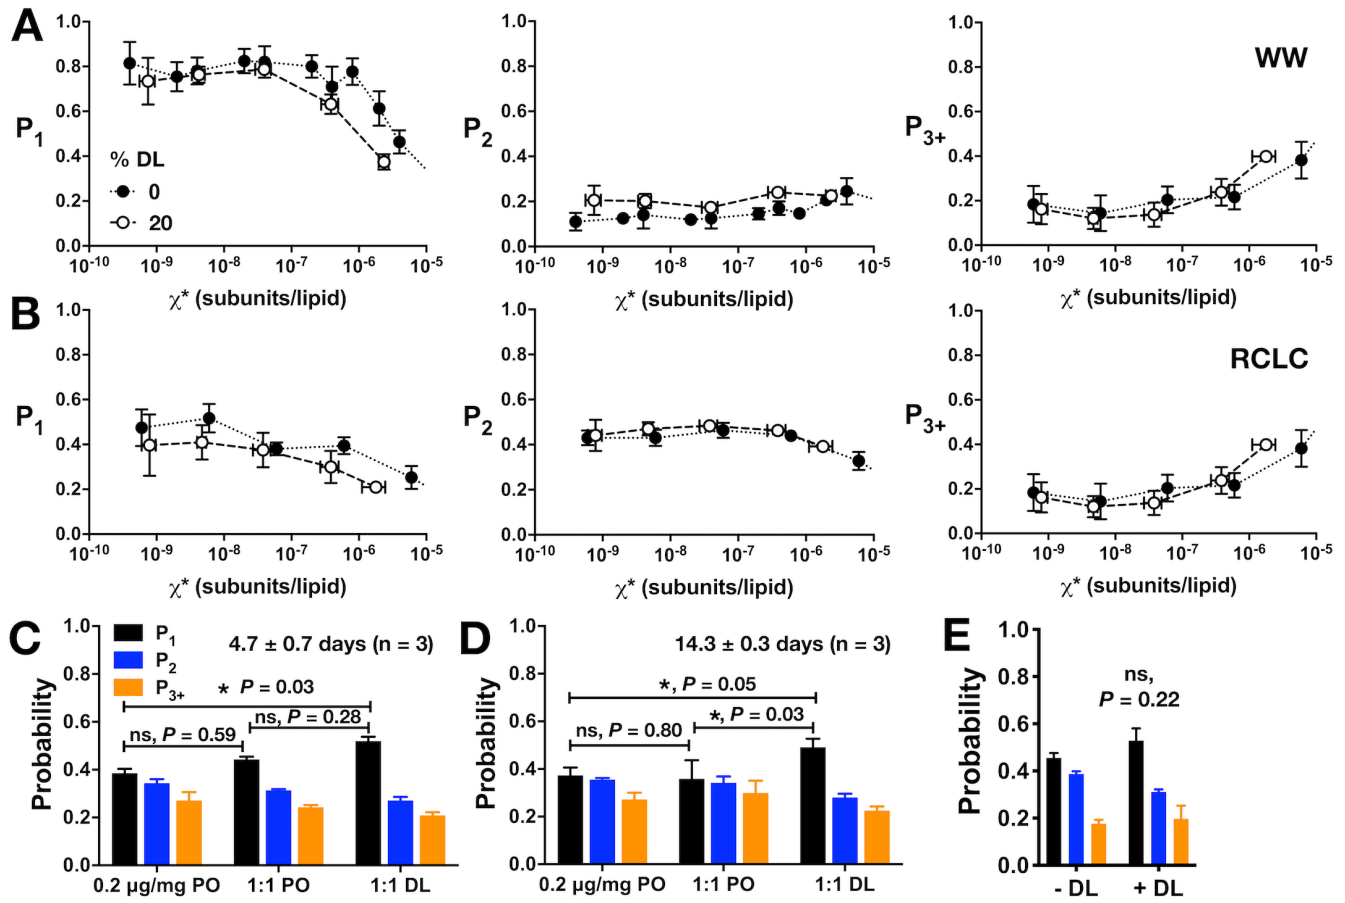

1351  
1352  
1353

1354  
1355

Figure 5

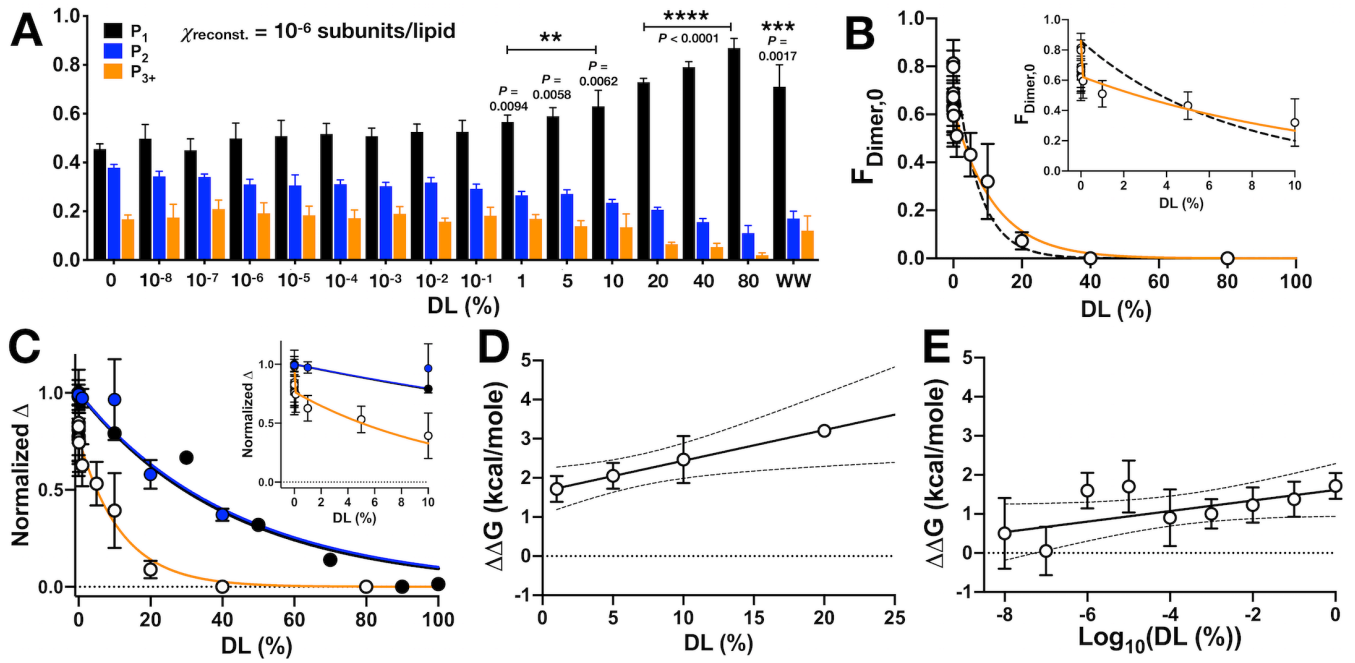

1356  
1357



1358  
1359

Figure 5 – figure supplement 1

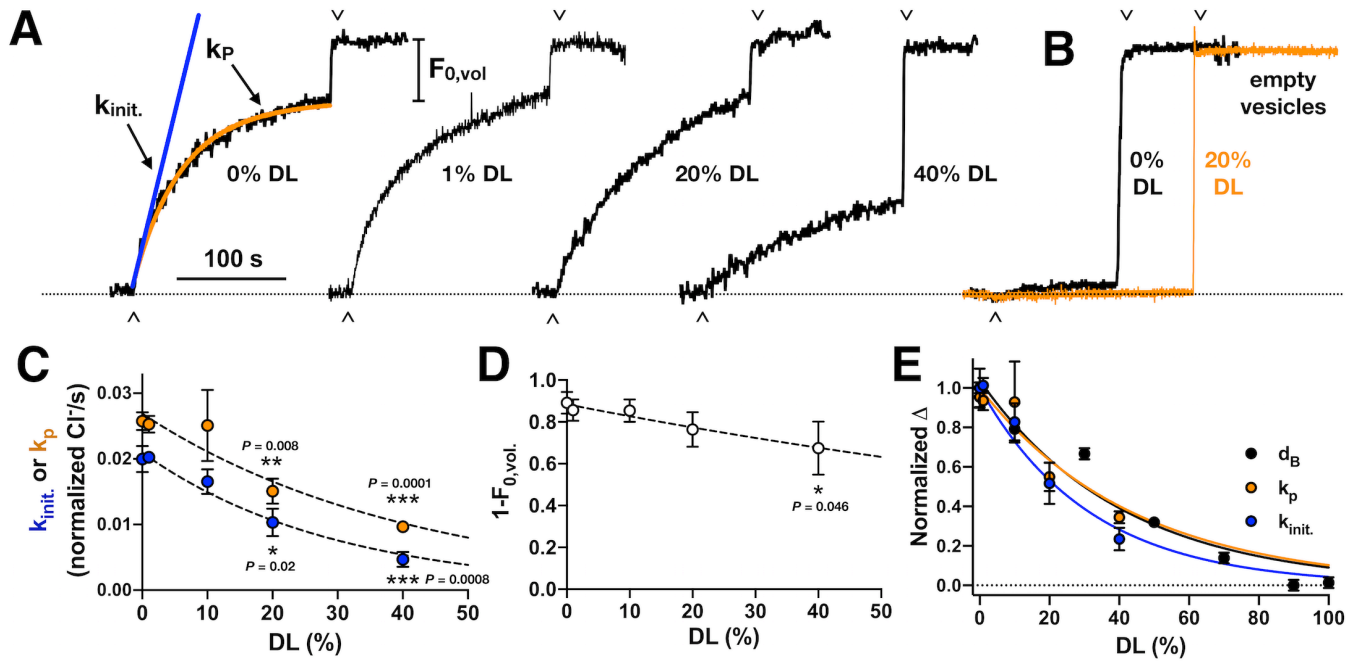

1360  
1361  
1362

1363  
1364

**Figure 6**

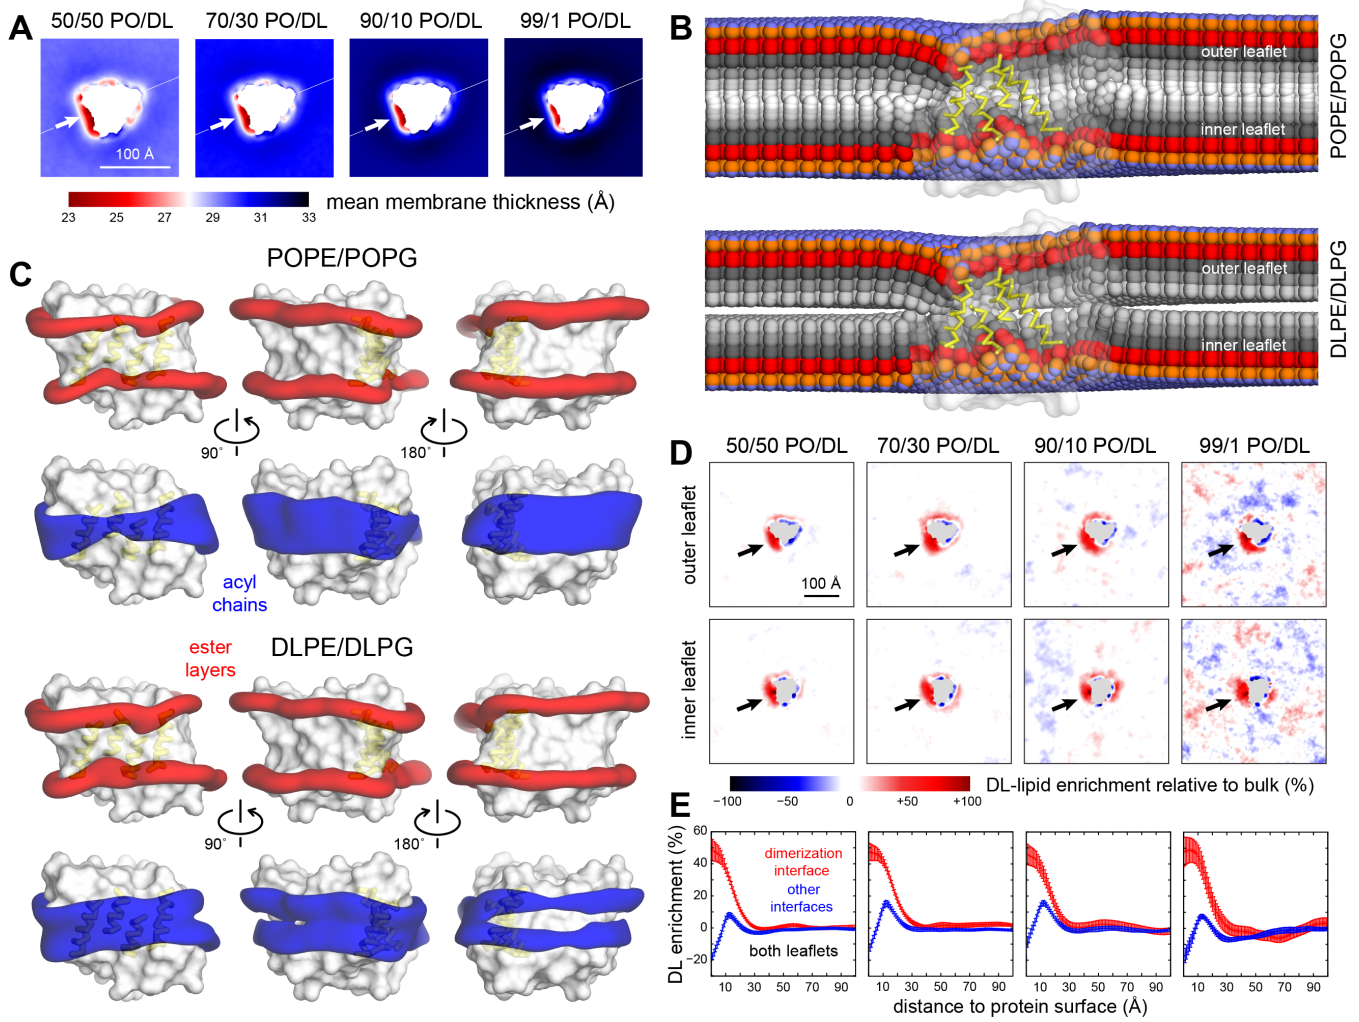

1365  
1366  
1367

1368  
1369

### Figure 6 – figure supplement 1

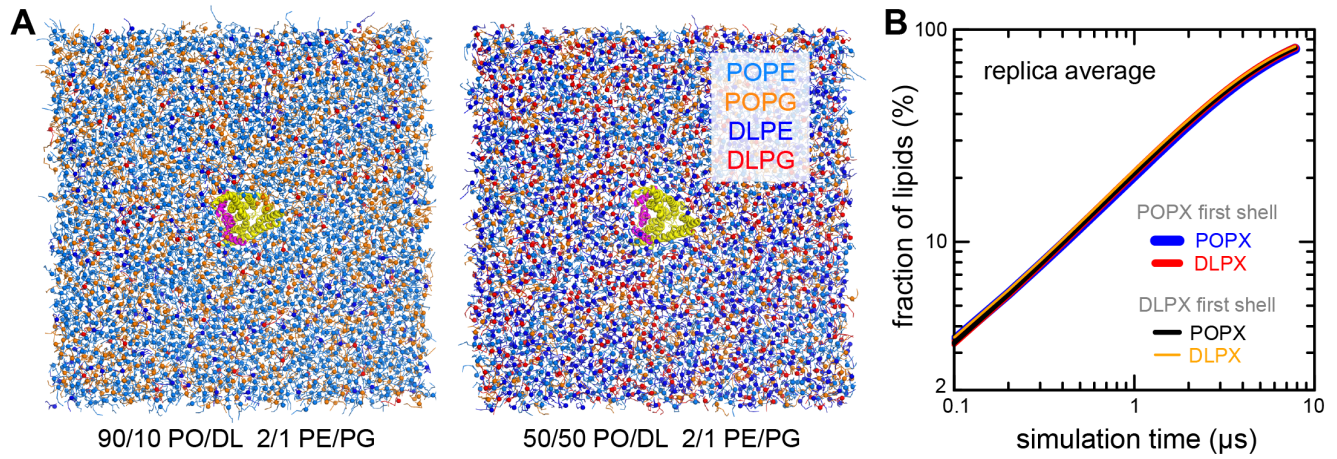

1370  
1371  
1372

1373  
1374

**Figure 6 – figure supplement 2**

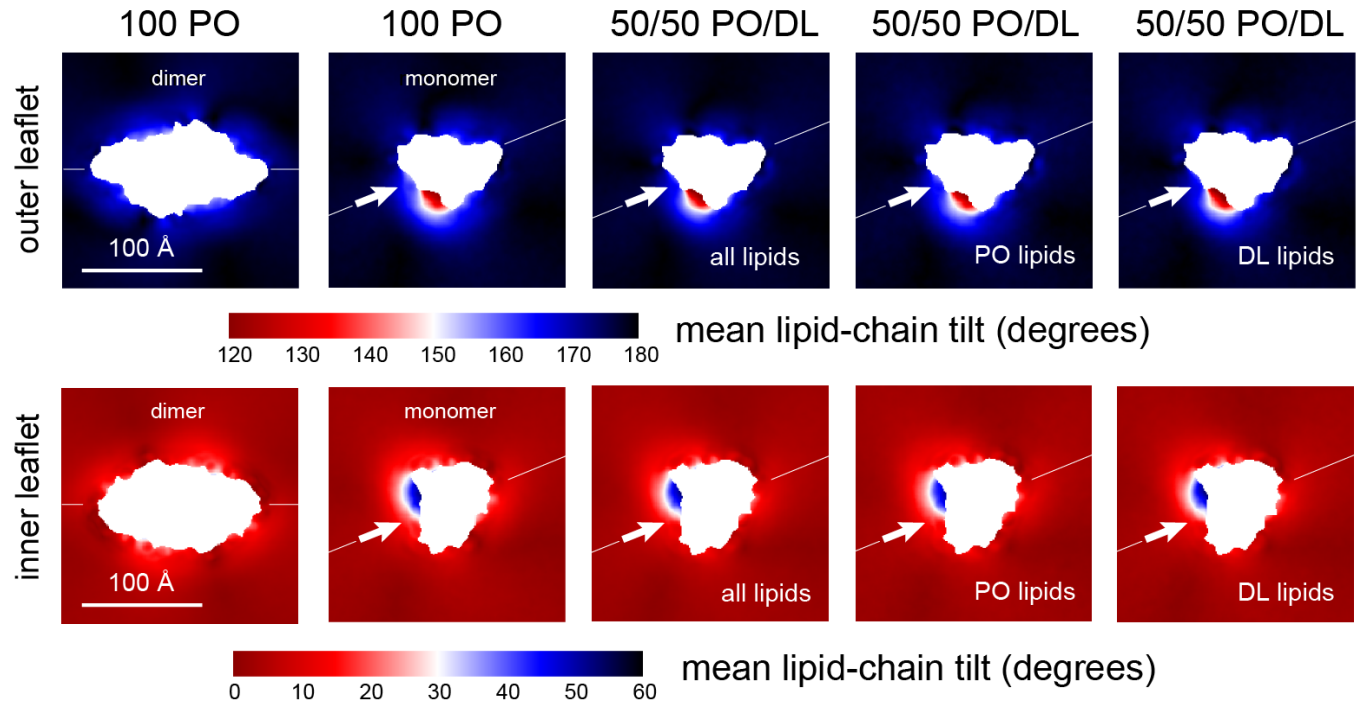

1375  
1376

1377  
1378

**Figure 7**

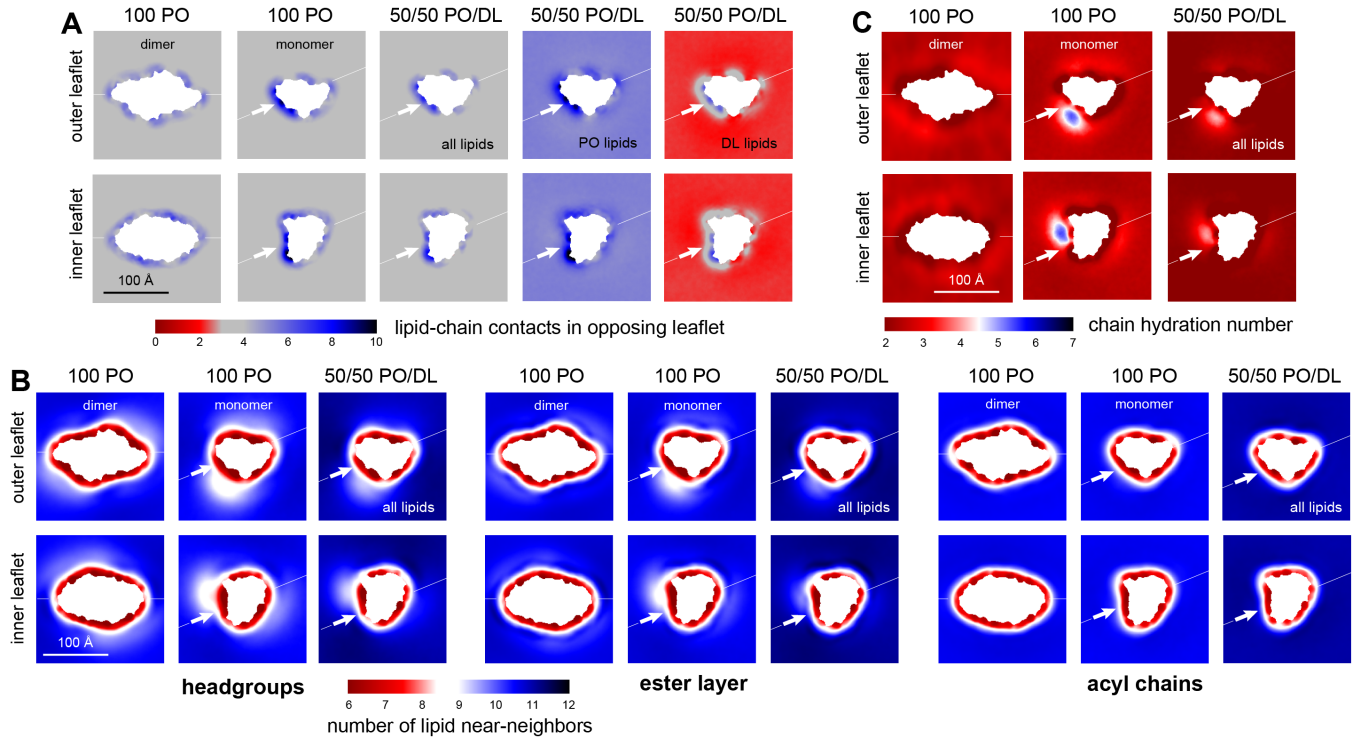

1379  
1380  
1381

1382 **SOURCE DATA LEGENDS**

1383

1384 **Figure 2 – source data 1. CGMD simulation specifications.** A total of 0.7 ms total simulation time was  
1385 carried out for this study.

1386

1387 **Figure 3 - source data 1. Differential scanning calorimetry for mixed DL/PO 2:1 PE/PG**  
1388 **membranes.** Measurement conducted on liposomes post freeze-thaw in the multi-lamellar state. Data  
1389 represented as mean  $\pm$  sem. Statistical analysis carried out using a two-tailed unpaired parametric student's  
1390 t-test compared to the 0% DL samples.

1391

1392 **Figure 3 - source data 2. SANS bilayer thickness analysis for mixed DL/PO 2:1 PE/PG membranes.**  
1393 100 nm extruded vesicles, at 25°C. Data represent best-fit  $\pm$  standard error. A description of the CGMD  
1394 analysis is in **Fig. 2 – fig. supp. 2.**

1395

1396 **Figure 4 - source data 1. Cryo-EM radii of 20% DL 2:1 POPE/POPG.** From single preparation of  
1397 400 nm extruded vesicles (n = 1).

1398

1399 **Figure 4 - source data 2. Chloride transport of CLC-ec1 in DL/PO proteoliposomes.** Data represent  
1400 mean  $\pm$  sem, n independent protein purifications and reconstitutions, with each sample measured as the  
1401 average of > 3 replicate measurements. Statistical analysis was calculated using a two-tailed unpaired  
1402 parametric student t-test compared to the 0% DL data set (\*,  $P < .05$ ; \*\*,  $P < .01$ ; \*\*\*,  $P < .001$ ).

1403

1404 **Figure 4 - source data 3. Photobleaching data for monomeric control CLC-ec1 I201W/I422W, WW-**  
1405 **Cy5 in 20% DL, 80% PO, 2:1 PE/PG lipids.**  $\chi^*$  is the reactive molar ratio of protein subunits and lipids,  
1406 based on the observed mole fraction calculated from the protein and lipid quantification assays, and  
1407 assuming the reaction occurs between oriented species in the membrane,  $\chi^* = \chi/2$ . Data are represented  
1408 as mean  $\pm$  standard error. Sample numbers, n, are listed separately for (mole fraction quantification,  
1409 photobleaching analysis).

1410

1411 **Figure 4 - source data 4. Photobleaching data for dimeric control CLC-ec1 R230C/L249C, RCLC-**  
1412 **Cy5 in 20% DL, 80% PO, 2:1 PE/PG lipids.**  $\chi^*$  is the reactive molar ratio of protein subunits and lipids,



1413 based on the observed mole fraction calculated from the protein and lipid quantification assays, and  
1414 assuming the reaction occurs between oriented species in the membrane,  $\chi^* = \chi/2$ . Data are represented  
1415 as mean  $\pm$  standard error. Sample numbers, n, are listed separately for (mole fraction quantification,  
1416 photobleaching analysis).

1417

1418 **Figure 4 - source data 5. Photobleaching data for monomeric control CLC-ec1 WT-Cy5 in 20%**  
1419 **DL, 80% PO, 2:1 PE/PG lipids.**  $\chi^*$  is the reactive molar ratio of protein subunits and lipids, based on  
1420 the observed mole fraction calculated from the protein and lipid quantification assays, and assuming the  
1421 reaction occurs between oriented species in the membrane,  $\chi^* = \chi/2$ .  $F_{dimer}$  is calculated based on the  
1422 WW-Cy5 and RCLC-Cy5 in 20% DL. Data are represented as mean  $\pm$  standard error. Sample numbers,  
1423 n, are listed separately for (mole fraction quantification, photobleaching analysis).

1424

1425 **Figure 4 - source data 6. Shift in dimer equilibrium upon fusion with DL containing vesicles.** CLC-  
1426 ec1-Cy5 proteoliposomes (0.2  $\mu\text{g}/\text{mg}$ ) in 100% PO, 2:1 PE/PG were either (A) unmodified, (B) fused with  
1427 100% PO 2:1 PE/PG liposomes or (C) fused with 40% DL, 60% PO 2:1 PE/PG liposomes by multiple  
1428 freeze-thaw cycles. Data represented as mean  $\pm$  sem, n = 3 independent samples. P-values are calculated  
1429 using a two-tailed student's t-test on the  $P_I$  photobleaching data, and using the  $\chi^2$  test on the ( $P_I, P_2, P_{3+}$ )  
1430 photobleaching probability distributions, designated in brackets (\*,  $P < .05$ ; \*\*,  $P < .01$ ).

1431

1432 **Figure 5 - source data 1. Photobleaching titration of CLC-ec1 WT-Cy5 in 2:1 PE/PG mixed DL/PO**  
1433 **membranes.** Data is represented as mean  $\pm$  sem, with independent sample preparations, n. Statistical  
1434 tests were calculated using a two-tailed, unpaired parametric student's t-test on  $P_I$  data, and a  $\chi^2$  test for  
1435 the mean ( $P_I, P_2, P_{3+}$ ) distributions, in brackets (\*,  $P \leq .05$ ; \*\*,  $P \leq .01$ ; \*\*\*,  $P \leq .001$ ; \*\*\*\*,  $P \leq .0001$ ),  
1436  $\Delta G^\circ$  is calculated for each  $F_{Dimer}$  value where  $0 < F_{Dimer} < 1$ , and  $\Delta\Delta G = \Delta G^\circ(x\% DL) - \text{mean}(\Delta G^\circ(0\% DL))$ ,  
1437 n in brackets.

1438

1439 **Figure 5 - source data 2. Testing for DL contamination during dialysis.** CLC-ec1-Cy5  
1440 proteoliposomes (0.1  $\mu\text{g}/\text{mg}$ ) in 100% PO, 2:1 PE/PG were dialyzed alone (-DL) or in the presence of a  
1441 cassette containing  $> 20\%$  DL (+DL). The P-value was calculated using a  $\chi^2$  test on the mean ( $P_I, P_2, P_{3+}$ )  
1442 photobleaching probability distributions. Data is represented as mean  $\pm$  standard deviation.

1443

1444 **Figure 5 - source data 3. DL and PO concentrations, mole fraction and molality in the titrated**  
1445 **DL/PO 2:1 POPE/POPG lipid bilayers.** Lipids are prepared at 20 mg/mL total lipid mass, and the %  
1446 DL mixtures are prepared by combining stock solutions, w/w of total lipid. Note, the headgroup mole  
1447 fraction remains nearly constant and ranges from  $\chi_{PE} = 0.68-0.69$  and  $\chi_{PG} = 0.31-0.32$  across the range of  
1448 % DL studied.  $MW_{POPE} = 717.996$  g/mole,  $MW_{POPG} = 770.989$  g/mole,  $MW_{DLPE} = 579.746$  g/mole,  
1449  $MW_{DLPG} = 632.739$  g/mole.

1450

1451

1452  
1453  
1454  
1455  
1456  
1457

## SOURCE DATA

**Figure 2 – source data 1. CGMD simulation specifications.** A total of 0.7 ms total simulation time was carried out for this study.

| Component                        | Dimer                    | Monomer                 |                         |                         |                         |                         | Pure Membrane           |                         |                         |                         |
|----------------------------------|--------------------------|-------------------------|-------------------------|-------------------------|-------------------------|-------------------------|-------------------------|-------------------------|-------------------------|-------------------------|
|                                  | 100% PO                  | 100% PO                 | 99% PO<br>1% DL         | 90% PO<br>10% DL        | 70% PO<br>30% DL        | 50% PO<br>50% DL        | 100% PO                 | 90% PO<br>10% DL        | 70% PO<br>30% DL        | 50% PO<br>50% DL        |
| Protein                          | 2                        | 1                       | 1                       | 1                       | 1                       | 1                       | 0                       | 0                       | 0                       | 0                       |
| POPE                             | 1814                     | 1819                    | 1954                    | 1672                    | 1251                    | 839                     | 892                     | 802                     | 616                     | 498                     |
| POPG                             | 959                      | 965                     | 977                     | 823                     | 626                     | 425                     | 296                     | 402                     | 320                     | 222                     |
| DLPE                             | 0                        | 0                       | 19                      | 214                     | 629                     | 976                     | 0                       | 88                      | 268                     | 448                     |
| DLPG                             | 0                        | 0                       | 11                      | 109                     | 343                     | 479                     | 0                       | 46                      | 104                     | 220                     |
| Na <sup>+</sup>                  | 1898                     | 1710                    | 1377                    | 1696                    | 1730                    | 1514                    | 572                     | 576                     | 554                     | 582                     |
| Cl <sup>-</sup>                  | 953                      | 748                     | 390                     | 771                     | 764                     | 613                     | 126                     | 128                     | 130                     | 140                     |
| H <sub>2</sub> O                 | 54,956                   | 35,382                  | 33,150                  | 36,333                  | 37,450                  | 26,814                  | 10,112                  | 10,304                  | 10,444                  | 11,179                  |
| System size (nm)                 | 29.4 x<br>29.4 x<br>12.0 | 29.1 x<br>29.1 x<br>9.4 | 30.4 x<br>30.4 x<br>8.6 | 29.0 x<br>29.0 x<br>9.5 | 29.0 x<br>29.0 x<br>9.6 | 27.9 x<br>27.9 x<br>8.3 | 19.9 x<br>19.9 x<br>7.4 | 19.8 x<br>19.8 x<br>7.4 | 19.5 x<br>19.5 x<br>7.5 | 19.5 x<br>19.5 x<br>7.6 |
| Number of replicas               | 10                       | 8                       | 8                       | 8                       | 8                       | 8                       | 8                       | 8                       | 8                       | 8                       |
| Simulation time per replica (μs) | 9.6 -<br>12.9            | 7.4                     | 20.0                    | 6.1                     | 6.0                     | 7.8                     | 6.0                     | 6.7                     | 7.8                     | 6.8                     |
| Total simulation time (μs)       | 107.4                    | 59.1                    | 160.0                   | 55.0                    | 48.3                    | 55.0                    | 48.0                    | 53.6                    | 62.7                    | 54.2                    |

1458  
1459  
1460  
1461

1462  
1463  
1464  
1465

**Figure 3 - source data 1. Differential scanning calorimetry for mixed DL/PO 2:1 PE/PG membranes.** Measurement conducted on liposomes post freeze-thaw in the multi-lamellar state. Data represented as mean  $\pm$  sem. Statistical analysis carried out using a two-tailed unpaired parametric student's t-test compared to the 0% DL samples.

| DL (%) | T <sub>m</sub> (°C) | n | P-value      |
|--------|---------------------|---|--------------|
| 0      | 20.3 $\pm$ 0.2      | 4 |              |
| 10     | 18.5 $\pm$ 0.4      | 3 | ** , 0.0046  |
| 30     | 14.6 $\pm$ 0.8      | 3 | *** , 0.0005 |
| 50     | 16.1 $\pm$ 0.7      | 3 | ** , 0.0014  |
| 70     | 19.1 $\pm$ 0.4      | 3 | * , 0.0333   |
| 100    | 25.9 $\pm$ 0.7      | 3 | *** , 0.0004 |

1466  
1467  
1468  
1469  
1470

1471  
1472  
1473

**Figure 3 - source data 2. SANS bilayer thickness analysis for mixed DL/PO 2:1 PE/PG membranes.** 100 nm extruded vesicles, at 25°C. Data represent best-fit  $\pm$  standard error. A description of the CGMD analysis is in **Fig. 2 – fig. supp. 2.**

| SANS data |                 |                 |       | CGMD analysis     |                |
|-----------|-----------------|-----------------|-------|-------------------|----------------|
| 2:1 PE/PG | $d_b$ (nm)      | $d_w$ (nm)      | % ULV | $d_{esters}$ (nm) | $d_{PO4}$ (nm) |
| 0% DL     | $3.70 \pm 0.02$ | $6.50 \pm 0.03$ | 85    | 3.20              | 4.06           |
| 10% DL    | $3.55 \pm 0.01$ | $5.85 \pm 0.03$ | 85    | 3.15              | 4.02           |
| 30% DL    | $3.46 \pm 0.02$ | $6.11 \pm 0.02$ | 85    | 3.06              | 3.92           |
| 50% DL    | $3.21 \pm 0.01$ | $6.49 \pm 0.03$ | 87    | 2.95              | 3.81           |
| 70% DL    | $3.08 \pm 0.02$ | $6.64 \pm 0.03$ | 90    | 2.85              | 3.72           |
| 90% DL    | $2.98 \pm 0.02$ | $6.65 \pm 0.04$ | 90    | 2.39              | 3.66           |
| 100% DL   | $2.99 \pm 0.02$ | $6.73 \pm 0.03$ | 95    |                   |                |

  

| PC (Kučerka et al., 2011) |                 |
|---------------------------|-----------------|
| 0% DL                     | $3.98 \pm 0.08$ |
| 100% DL                   | $3.30 \pm 0.07$ |

  

| PG** (Pan et al., 2014) |      |
|-------------------------|------|
| 0% DL                   | 3.85 |
| 100% DL                 | 3.14 |

1474  
1475  
1476  
1477  
1478

1479  
1480  
1481

**Figure 4 - source data 1. Cryo-EM radii of 20% DL 2:1 POPE/POPG.** From single preparation of 400 nm extruded vesicles (n = 1).

| r, nm | P <sub>radius</sub> | F <sub>SA</sub> | Cumulative F <sub>SA</sub> |
|-------|---------------------|-----------------|----------------------------|
| 2.5   | 0                   | 0               | 0                          |
| 7.5   | 0.0129              | 0.00018         | 0.00018                    |
| 12.5  | 0.0516              | 0.00201         | 0.00219                    |
| 17.5  | 0.1226              | 0.00936         | 0.01155                    |
| 22.5  | 0.0387              | 0.00489         | 0.01644                    |
| 27.5  | 0.0839              | 0.01582         | 0.03226                    |
| 32.5  | 0.0516              | 0.01360         | 0.04586                    |
| 37.5  | 0.0839              | 0.02941         | 0.07527                    |
| 42.5  | 0.07097             | 0.03197         | 0.10724                    |
| 47.5  | 0.05807             | 0.03267         | 0.13991                    |
| 52.5  | 0.10323             | 0.07096         | 0.21087                    |
| 57.5  | 0.03871             | 0.03192         | 0.24278                    |
| 62.5  | 0.04516             | 0.04400         | 0.28678                    |
| 67.5  | 0.05807             | 0.06598         | 0.35276                    |
| 72.5  | 0.03226             | 0.04229         | 0.39504                    |
| 77.5  | 0.00645             | 0.00967         | 0.40470                    |
| 82.5  | 0.01290             | 0.02190         | 0.42661                    |
| 87.5  | 0.00645             | 0.01232         | 0.43893                    |
| 92.5  | 0.01290             | 0.02753         | 0.46646                    |
| 97.5  | 0.00645             | 0.01530         | 0.48175                    |
| 102.5 | 0.01290             | 0.03381         | 0.51556                    |
| 107.5 | 0.00645             | 0.01859         | 0.53416                    |
| 112.5 | 0.00645             | 0.02036         | 0.55452                    |
| 117.5 | 0                   | 0               | 0.55452                    |
| 122.5 | 0.00645             | 0.02415         | 0.57866                    |
| 127.5 | 0.00645             | 0.02616         | 0.60482                    |
| 132.5 | 0                   | 0               | 0.60482                    |
| 137.5 | 0.01290             | 0.06084         | 0.66566                    |
| 142.5 | 0.00645             | 0.03267         | 0.69833                    |
| 147.5 | 0.01936             | 0.10502         | 0.80335                    |
| 152.5 | 0.00645             | 0.03742         | 0.84076                    |
| 157.5 | 0.00645             | 0.03991         | 0.88068                    |
| 162.5 | 0                   | 0               | 0.88068                    |
| 167.5 | 0                   | 0               | 0.88068                    |
| 172.5 | 0                   | 0               | 0.88068                    |
| 177.5 | 0                   | 0               | 0.88068                    |
| 182.5 | 0                   | 0               | 0.88068                    |
| 187.5 | 0.00645             | 0.05657         | 0.93724                    |
| 192.5 | 0                   | 0               | 0.93724                    |
| 197.5 | 0.00645             | 0.06276         | 1                          |

1482  
1483  
1484  
1485  
1486  
1487  
1488  
1489  
1490  
1491  
1492  
1493



1494  
1495  
1496  
1497  
1498

**Figure 4 - source data 2. Chloride transport of CLC-ec1 in DL/PO proteoliposomes.** Data represent mean  $\pm$  sem, n independent protein purifications and reconstitutions, with each sample measured as the average of > 3 replicate measurements. Statistical analysis was calculated using a two-tailed unpaired parametric student t-test compared to the 0% DL data set (\*,  $P < .05$ ; \*\*,  $P < .01$ ; \*\*\*,  $P < .001$ ).

| DL (%) | $F_{0,vol.}$    | <i>P</i> -value | $k_p$ (norm. Cl/s) | <i>P</i> -value | $k_{init.}$ (norm. Cl/s) | <i>P</i> -value | n |
|--------|-----------------|-----------------|--------------------|-----------------|--------------------------|-----------------|---|
| 0      | 0.25 $\pm$ 0.02 |                 | 0.026 $\pm$ 0.001  |                 | 0.020 $\pm$ 0.002        |                 | 3 |
| 1      | 0.25 $\pm$ 0.01 | ns, 0.98        | 0.025 $\pm$ 0.001  | ns, 0.81        | 0.020 $\pm$ 0.001        | ns, 0.89        | 4 |
| 10     | 0.26 $\pm$ 0.02 | ns, 0.92        | 0.025 $\pm$ 0.005  | ns, 0.92        | 0.017 $\pm$ 0.002        | ns, 0.27        | 4 |
| 20     | 0.33 $\pm$ 0.08 | ns, 0.50        | 0.015 $\pm$ 0.002  | **, 0.008       | 0.010 $\pm$ 0.002        | *, 0.02         | 5 |
| 40     | 0.57 $\pm$ 0.10 | *, 0.046        | 0.010 $\pm$ 0.001  | ***, 0.0001     | 0.005 $\pm$ 0.001        | ***, 0.0008     | 4 |

1499  
1500  
1501

1502  
1503  
1504  
1505  
1506  
1507

**Figure 4 - source data 3. Photobleaching data for monomeric control CLC-ec1 I201W/I422W, WW-Cy5 in 20% DL, 80% PO, 2:1 PE/PG lipids.**  $\chi^*$  is the reactive molar ratio of protein subunits and lipids, based on the observed mole fraction calculated from the protein and lipid quantification assays, and assuming the reaction occurs between oriented species in the membrane,  $\chi^* = \chi/2$ . Data are represented as mean  $\pm$  standard error. Sample numbers, n, are listed separately for (mole fraction quantification, photobleaching analysis).

| density ( $\mu\text{g}/\text{mg}$ ) | $\chi^*$ (subunits/lipid)         | $P_{\text{Cy5}}$ | days          | $P_1$           | $P_2$           | $P_{3+}$        | n     |
|-------------------------------------|-----------------------------------|------------------|---------------|-----------------|-----------------|-----------------|-------|
| 0.0001                              | $(8.24 \pm 3.07) \times 10^{-10}$ | $0.78 \pm 0.03$  | $4.0 \pm 0.0$ | $0.74 \pm 0.11$ | $0.21 \pm 0.07$ | $0.06 \pm 0.04$ | (2,2) |
| 0.001                               | $(3.39 \pm 0.57) \times 10^{-9}$  | $0.77 \pm 0.02$  | $3.7 \pm 0.3$ | $0.76 \pm 0.04$ | $0.20 \pm 0.03$ | $0.04 \pm 0.00$ | (2,3) |
| 0.01                                | $(2.92 \pm 0.21) \times 10^{-8}$  | $0.77 \pm 0.02$  | $3.7 \pm 0.3$ | $0.79 \pm 0.01$ | $0.17 \pm 0.01$ | $0.04 \pm 0.01$ | (2,3) |
| 0.1                                 | $(2.77 \pm 0.31) \times 10^{-7}$  | $0.77 \pm 0.02$  | $3.7 \pm 0.3$ | $0.63 \pm 0.04$ | $0.24 \pm 0.02$ | $0.13 \pm 0.03$ | (2,3) |
| 0.5                                 | $(2.05 \pm 0.42) \times 10^{-6}$  | $0.78 \pm 0.03$  | $4.0 \pm 0.0$ | $0.38 \pm 0.04$ | $0.23 \pm 0.01$ | $0.41 \pm 0.03$ | (2,2) |

1508  
1509  
1510  
1511

1512  
1513  
1514  
1515  
1516  
1517

**Figure 4 - source data 4. Photobleaching data for dimeric control CLC-ec1 R230C/L249C, RCLC-Cy5 in 20% DL, 80% PO, 2:1 PE/PG lipids.**  $\chi^*$  is the reactive molar ratio of protein subunits and lipids, based on the observed mole fraction calculated from the protein and lipid quantification assays, and assuming the reaction occurs between oriented species in the membrane,  $\chi^* = \chi/2$ . Data are represented as mean  $\pm$  standard error. Sample numbers, n, are listed separately for (mole fraction quantification, photobleaching analysis).

| density ( $\mu\text{g}/\text{mg}$ ) | $\chi^*$ (subunits/lipid)        | $P_{\text{Cy5}}$ | days          | $P_1$           | $P_2$           | $P_{3+}$        | n     |
|-------------------------------------|----------------------------------|------------------|---------------|-----------------|-----------------|-----------------|-------|
| 0.0001                              | $9.72 \times 10^{-10}$           | $0.73 \pm 0.02$  | $3.0 \pm 0.0$ | $0.40 \pm 0.14$ | $0.44 \pm 0.07$ | $0.16 \pm 0.07$ | (1,2) |
| 0.001                               | $(4.06 \pm 0.53) \times 10^{-9}$ | $0.73 \pm 0.01$  | $3.7 \pm 0.7$ | $0.41 \pm 0.08$ | $0.47 \pm 0.03$ | $0.12 \pm 0.05$ | (2,3) |
| 0.01                                | $(2.69 \pm 0.28) \times 10^{-8}$ | $0.77 \pm 0.02$  | $3.7 \pm 0.3$ | $0.38 \pm 0.08$ | $0.48 \pm 0.02$ | $0.14 \pm 0.05$ | (2,3) |
| 0.1                                 | $(2.77 \pm 0.76) \times 10^{-7}$ | $0.77 \pm 0.02$  | $3.7 \pm 0.3$ | $0.30 \pm 0.07$ | $0.46 \pm 0.02$ | $0.24 \pm 0.06$ | (2,3) |
| 0.5                                 | $(1.17 \pm 0.48) \times 10^{-6}$ | $0.73 \pm 0.02$  | $3.0 \pm 0.0$ | $0.21 \pm 0.00$ | $0.39 \pm 0.01$ | $0.40 \pm 0.01$ | (2,2) |

1518  
1519  
1520  
1521

1522  
1523  
1524  
1525  
1526  
1527

**Figure 4 - source data 5. Photobleaching data for monomeric control CLC-ec1 WT-Cy5 in 20% DL, 80% PO, 2:1 PE/PG lipids.**  $\chi^*$  is the reactive molar ratio of protein subunits and lipids, based on the observed mole fraction calculated from the protein and lipid quantification assays, and assuming the reaction occurs between oriented species in the membrane,  $\chi^* = \chi/2$ .  $F_{dimer}$  is calculated based on the WW-Cy5 and RCLC-Cy5 in 20% DL. Data are represented as mean  $\pm$  standard error. Sample numbers, n, are listed separately for (mole fraction quantification, photobleaching analysis).

| density ( $\mu\text{g}/\text{mg}$ ) | $\chi^*$ (subunits/lipid)        | $P_{\text{Cy5}}$ | days          | $P_1$           | $P_2$           | $P_{3+}$        | $F_{dimer}$     | n     |
|-------------------------------------|----------------------------------|------------------|---------------|-----------------|-----------------|-----------------|-----------------|-------|
| 0.0001                              | $(1.42 \pm 0.17) \times 10^{-9}$ | $0.69 \pm 0.00$  | $3.0 \pm 0.0$ | $0.83 \pm 0.01$ | $0.15 \pm 0.01$ | $0.02 \pm 0.01$ | $0.00 \pm 0.00$ | (2,2) |
| 0.001                               | $(5.23 \pm 0.61) \times 10^{-9}$ | $0.68 \pm 0.01$  | $4.5 \pm 1.0$ | $0.77 \pm 0.00$ | $0.18 \pm 0.02$ | $0.05 \pm 0.02$ | $0.07 \pm 0.06$ | (2,4) |
| 0.01                                | $(3.11 \pm 0.77) \times 10^{-8}$ | $0.68 \pm 0.01$  | $4.5 \pm 1.0$ | $0.74 \pm 0.02$ | $0.22 \pm 0.02$ | $0.04 \pm 0.01$ | $0.13 \pm 0.05$ | (3,4) |
| 0.1                                 | $(4.21 \pm 0.44) \times 10^{-7}$ | $0.68 \pm 0.01$  | $4.5 \pm 1.0$ | $0.63 \pm 0.03$ | $0.28 \pm 0.02$ | $0.09 \pm 0.02$ | $0.11 \pm 0.05$ | (3,4) |
| 0.5                                 | $(1.87 \pm 0.30) \times 10^{-6}$ | $0.69 \pm 0.00$  | $3.0 \pm 0.0$ | $0.33 \pm 0.02$ | $0.28 \pm 0.01$ | $0.39 \pm 0.02$ | $0.40 \pm 0.08$ | (2,2) |

1528  
1529  
1530

1531  
1532  
1533  
1534  
1535  
1536

**Figure 4 - source data 6. Shift in dimer equilibrium upon fusion with DL containing vesicles.** CLC-ec1-Cy5 proteoliposomes (0.2  $\mu\text{g}/\text{mg}$ ) in 100% PO, 2:1 PE/PG were either (A) unmodified, (B) fused with 100% PO 2:1 PE/PG liposomes or (C) fused with 40% DL, 60% PO 2:1 PE/PG liposomes by multiple freeze-thaw cycles. Data represented as mean  $\pm$  sem,  $n = 3$  independent samples. P-values are calculated using a two-tailed student's t-test on the  $P_1$  photobleaching data, and using the  $\chi^2$  test on the ( $P_1, P_2, P_{3+}$ ) photobleaching probability distributions, designated in brackets (\*,  $P < .05$ ; \*\*,  $P < .01$ ).

| Sample                                   | $P_{\text{Cy5}}$ | days           | $P_1$           | $P_2$           | $P_{3+}$        | P-value                                                                                       |
|------------------------------------------|------------------|----------------|-----------------|-----------------|-----------------|-----------------------------------------------------------------------------------------------|
| A: 0% DL,<br>0.2 $\mu\text{g}/\text{mg}$ | 0.69 $\pm$ 0.01  | 4.7 $\pm$ 0.7  | 0.39 $\pm$ 0.02 | 0.34 $\pm$ 0.02 | 0.27 $\pm$ 0.04 |                                                                                               |
|                                          |                  | 14.3 $\pm$ 0.3 | 0.37 $\pm$ 0.03 | 0.35 $\pm$ 0.01 | 0.27 $\pm$ 0.03 |                                                                                               |
| B: 1:1 dilution<br>of A with 0%<br>DL    |                  | 4.7 $\pm$ 0.7  | 0.44 $\pm$ 0.01 | 0.31 $\pm$ 0.00 | 0.24 $\pm$ 0.01 | ns, $P_{AB} = 0.06$<br>(ns, $P_{AB} = 0.59$ )                                                 |
|                                          |                  | 14.3 $\pm$ 0.3 | 0.36 $\pm$ 0.08 | 0.34 $\pm$ 0.03 | 0.30 $\pm$ 0.05 | ns, $P_{AB} = 0.87$<br>(ns, $P_{AB} = 0.80$ )                                                 |
| C: 1:1 dilution<br>of A with 40%<br>DL   |                  | 4.7 $\pm$ 0.7  | 0.52 $\pm$ 0.02 | 0.27 $\pm$ 0.01 | 0.21 $\pm$ 0.01 | ** , $P_{AC} = 0.007$<br>* , $P_{BC} = 0.02$<br>(* , $P_{AC} = 0.03$<br>ns, $P_{BC} = 0.28$ ) |
|                                          |                  | 14.3 $\pm$ 0.3 | 0.49 $\pm$ 0.04 | 0.28 $\pm$ 0.02 | 0.23 $\pm$ 0.02 | ns, $P_{AC} = 0.07$<br>ns, $P_{BC} = 0.20$<br>(* , $P_{AC} = 0.05$<br>* , $P_{BC} = 0.03$ )   |

1537  
1538  
1539  
1540  
1541  
1542  
1543

1544  
1545  
1546  
1547  
1548  
1549

**Figure 5 - source data 1. Photobleaching titration of CLC-ec1 WT-Cy5 in 2:1 PE/PG mixed DL/PO membranes.** Data is represented as mean  $\pm$  sem, with independent sample preparations, n. Statistical tests were calculated using a two-tailed, unpaired parametric student's t-test on  $P_1$  data, and a  $\chi^2$  test for the mean ( $P_1, P_2, P_{3+}$ ) distributions, in brackets (\*,  $P \leq .05$ ; \*\*,  $P \leq .01$ ; \*\*\*,  $P \leq .001$ ; \*\*\*\*,  $P \leq .0001$ ).  $\Delta G^\circ$  is calculated for each  $F_{Dimer}$  value where  $0 < F_{Dimer} < 1$ , and  $\Delta\Delta G = \Delta G^\circ(x\% DL) - \text{mean}(\Delta G^\circ(0\% DL))$ , n in brackets.

| % DL (w/w) | $P_{Cy5}$       | days          | $P_1$           | $P_2$           | $P_{3+}$        | n | P-value                          | $F_{dimer}$     | $\Delta\Delta G$ (kcal/mole) |
|------------|-----------------|---------------|-----------------|-----------------|-----------------|---|----------------------------------|-----------------|------------------------------|
| 0          | 0.65 $\pm$ 0.01 | 5.1 $\pm$ 0.9 | 0.46 $\pm$ 0.02 | 0.38 $\pm$ 0.01 | 0.17 $\pm$ 0.02 | 9 |                                  | 0.81 $\pm$ 0.05 |                              |
| 1e-8       | 0.65 $\pm$ 0.02 | 4.0 $\pm$ 0.6 | 0.50 $\pm$ 0.06 | 0.33 $\pm$ 0.01 | 0.18 $\pm$ 0.05 | 4 | ns, 0.41<br>ns, 0.67             | 0.69 $\pm$ 0.14 | 0.5 $\pm$ 0.9 (4)            |
| 1e-7       | 0.64 $\pm$ 0.01 | 4.3 $\pm$ 0.5 | 0.45 $\pm$ 0.05 | 0.34 $\pm$ 0.01 | 0.21 $\pm$ 0.04 | 4 | ns, 0.92<br>ns, 0.54             | 0.80 $\pm$ 0.11 | 0.0 $\pm$ 0.6 (4)            |
| 1e-6       | 0.65 $\pm$ 0.02 | 4.0 $\pm$ 0.6 | 0.50 $\pm$ 0.06 | 0.31 $\pm$ 0.02 | 0.19 $\pm$ 0.04 | 4 | ns, 0.42<br>ns, 0.32             | 0.66 $\pm$ 0.14 | 1.6 $\pm$ 0.4 (3)            |
| 1e-5       | 0.64 $\pm$ 0.01 | 4.3 $\pm$ 0.5 | 0.51 $\pm$ 0.06 | 0.31 $\pm$ 0.04 | 0.18 $\pm$ 0.04 | 4 | ns, 0.33<br>ns, 0.31             | 0.63 $\pm$ 0.17 | 1.7 $\pm$ 0.5 (3)            |
| 1e-4       | 0.65 $\pm$ 0.01 | 3.6 $\pm$ 0.6 | 0.52 $\pm$ 0.04 | 0.31 $\pm$ 0.02 | 0.17 $\pm$ 0.03 | 5 | ns, 0.17<br>ns, 0.28             | 0.63 $\pm$ 0.10 | 0.9 $\pm$ 0.7 (5)            |
| 1e-3       | 0.64 $\pm$ 0.01 | 3.8 $\pm$ 0.8 | 0.51 $\pm$ 0.03 | 0.30 $\pm$ 0.02 | 0.19 $\pm$ 0.03 | 4 | ns, 0.21<br>ns, 0.22             | 0.67 $\pm$ 0.07 | 1.0 $\pm$ 0.4 (4)            |
| 1e-2       | 0.66 $\pm$ 0.01 | 3.3 $\pm$ 0.6 | 0.52 $\pm$ 0.03 | 0.32 $\pm$ 0.02 | 0.16 $\pm$ 0.01 | 4 | ns, 0.10<br>ns, 0.35             | 0.62 $\pm$ 0.09 | 1.2 $\pm$ 0.5 (4)            |
| 0.1        | 0.65 $\pm$ 0.00 | 3.8 $\pm$ 0.8 | 0.52 $\pm$ 0.05 | 0.29 $\pm$ 0.02 | 0.18 $\pm$ 0.04 | 4 | ns, 0.14<br>ns, 0.13             | 0.60 $\pm$ 0.11 | 1.4 $\pm$ 0.4 (4)            |
| 1          | 0.65 $\pm$ 0.01 | 3.6 $\pm$ 0.6 | 0.57 $\pm$ 0.03 | 0.27 $\pm$ 0.02 | 0.17 $\pm$ 0.02 | 5 | ** , 0.0094<br>* , 0.036         | 0.51 $\pm$ 0.09 | 1.7 $\pm$ 0.3 (5)            |
| 5          | 0.65 $\pm$ 0.01 | 7.5 $\pm$ 3.9 | 0.59 $\pm$ 0.03 | 0.27 $\pm$ 0.02 | 0.14 $\pm$ 0.02 | 4 | ** , 0.0058<br>* , 0.015         | 0.43 $\pm$ 0.09 | 2.0 $\pm$ 0.3 (4)            |
| 10         | 0.65 $\pm$ 0.01 | 6.0 $\pm$ 2.6 | 0.63 $\pm$ 0.07 | 0.24 $\pm$ 0.02 | 0.13 $\pm$ 0.05 | 3 | ** , 0.0062<br>*** , 0.0007      | 0.32 $\pm$ 0.16 | 2.5 $\pm$ 0.6 (3)            |
| 20         | 0.65 $\pm$ 0.01 | 5.0 $\pm$ 1.2 | 0.73 $\pm$ 0.02 | 0.20 $\pm$ 0.01 | 0.07 $\pm$ 0.01 | 4 | **** , <0.0001<br>**** , <0.0001 | 0.07 $\pm$ 0.04 | 3.2 $\pm$ 0.0 (2)            |
| 40         | 0.65 $\pm$ 0.01 | 4.5 $\pm$ 1.3 | 0.79 $\pm$ 0.02 | 0.16 $\pm$ 0.01 | 0.05 $\pm$ 0.01 | 4 | **** , <0.0001<br>**** , <0.0001 | 0.00 $\pm$ 0.00 | ND                           |
| 80         | 0.65 $\pm$ 0.01 | 4.5 $\pm$ 1.3 | 0.88 $\pm$ 0.03 | 0.10 $\pm$ 0.02 | 0.02 $\pm$ 0.01 | 3 | **** , <0.0001<br>**** , <0.0001 | 0.00 $\pm$ 0.00 | ND                           |

1550  
1551  
1552  
1553  
1554  
1555  
1556  
1557  
1558  
1559



1560  
1561  
1562  
1563  
1564

**Figure 5 - source data 2. Testing for DL contamination during dialysis.** CLC-ec1-Cy5 proteoliposomes (0.1  $\mu\text{g}/\text{mg}$ ) in 100% PO, 2:1 PE/PG were dialyzed alone (-DL) or in the presence of a cassette containing > 20% DL (+DL). The *P*-value was calculated using a  $\chi^2$  test on the mean ( $P_1, P_2, P_{3+}$ ) photobleaching probability distributions. Data is represented as mean  $\pm$  standard deviation.

| sample | $P_{\text{Cy5}}$ | days      | $P_1$           | $P_2$           | $P_{3+}$        | n | <i>P</i> -value |
|--------|------------------|-----------|-----------------|-----------------|-----------------|---|-----------------|
| -DL    | 0.65 $\pm$ 0.02  | 5 $\pm$ 3 | 0.46 $\pm$ 0.06 | 0.38 $\pm$ 0.04 | 0.17 $\pm$ 0.05 | 9 | ns, 0.22        |
| +DL    |                  |           | 0.53 $\pm$ 0.09 | 0.31 $\pm$ 0.02 | 0.20 $\pm$ 0.10 | 3 |                 |

1565  
1566  
1567

1568  
1569  
1570  
1571  
1572  
1573

**Figure 5 - source data 3. DL and PO concentrations, mole fraction and molality in the titrated DL/PO 2:1 POPE/POPG lipid bilayers.** Lipids are prepared at 20 mg/mL total lipid mass, and the % DL mixtures are prepared by combining stock solutions, w/w of total lipid. Note, the headgroup mole fraction remains nearly constant and ranges from  $\chi_{PE} = 0.68-0.69$  and  $\chi_{PG} = 0.31-0.32$  across the range of % DL studied.  $MW_{POPE} = 717.996$  g/mole,  $MW_{POPG} = 770.989$  g/mole,  $MW_{DLPE} = 579.746$  g/mole,  $MW_{DLPG} = 632.739$  g/mole.

| mass ratio | Concentration |              |           | Lipid mole fraction |             | Molality    |                     | Protein mole fraction |
|------------|---------------|--------------|-----------|---------------------|-------------|-------------|---------------------|-----------------------|
|            | % DL (w/w)    | [Lipid] (mM) | [DL] (mM) | [PO] (mM)           | $\chi_{DL}$ | $\chi_{PO}$ | $m_{DL}$ (moles/Kg) | $m_{PO}$ (moles/Kg)   |
| 0          | 27.2          | 0.0          | 27.2      | 0.00                | 1.00        | 0.00        | 1.36                | 1.0e-6                |
| 1e-8       | 27.2          | 3.4e-9       | 27.2      | 1.2e-10             | 1.00        | 1.7e-10     | 1.36                | 1.0e-6                |
| 1e-7       | 27.2          | 3.4e-8       | 27.2      | 1.2e-09             | 1.00        | 1.7e-9      | 1.36                | 1.0e-6                |
| 1e-6       | 27.2          | 3.4e-7       | 27.2      | 1.2e-08             | 1.00        | 1.7e-8      | 1.36                | 1.0e-6                |
| 1e-5       | 27.2          | 3.4e-6       | 27.2      | 1.2e-07             | 1.00        | 1.7e-7      | 1.36                | 1.0e-6                |
| 1e-4       | 27.2          | 3.4e-5       | 27.2      | 1.2e-06             | 1.00        | 1.7e-6      | 1.36                | 1.0e-6                |
| 1e-3       | 27.2          | 3.4e-4       | 27.2      | 1.2e-05             | 1.00        | 1.7e-5      | 1.36                | 1.0e-6                |
| 1e-2       | 27.2          | 3.4e-3       | 27.2      | 1.2e-04             | 1.00        | 1.7e-4      | 1.36                | 1.0e-6                |
| 0.1        | 27.2          | 3.4e-2       | 27.2      | 0.01                | 0.99        | 1.7e-3      | 1.36                | 1.0e-6                |
| 1          | 27.3          | 3.4e-1       | 26.9      | 0.01                | 0.99        | 1.7e-2      | 1.35                | 1.0e-7                |
| 5          | 27.5          | 1.7          | 25.9      | 0.06                | 0.94        | 8.4e-2      | 1.29                | 9.9e-7                |
| 10         | 27.8          | 3.4          | 24.5      | 0.12                | 0.88        | 0.17        | 1.22                | 9.8e-7                |
| 15         | 28.2          | 5.0          | 23.1      | 0.18                | 0.82        | 0.25        | 1.16                | 9.7e-7                |
| 20         | 28.5          | 6.7          | 21.8      | 0.24                | 0.77        | 0.34        | 1.09                | 9.6e-7                |
| 30         | 29.1          | 10.1         | 19.1      | 0.35                | 0.65        | 0.50        | 0.95                | 9.4e-7                |
| 40         | 29.7          | 13.4         | 16.3      | 0.45                | 0.55        | 0.67        | 0.82                | 9.2e-7                |
| 50         | 30.4          | 16.8         | 13.6      | 0.55                | 0.45        | 0.84        | 0.68                | 9.0e-7                |
| 70         | 31.6          | 23.5         | 8.2       | 0.74                | 0.26        | 1.17        | 0.41                | 8.6e-7                |
| 80         | 32.3          | 26.8         | 5.4       | 0.83                | 0.17        | 1.34        | 0.27                | 8.4e-7                |
| 100        | 33.5          | 33.5         | 0.0       | 1.00                | 0.00        | 1.68        | 0.00                | 8.1e-7                |

1574  
1575  
1576  
1577  
1578  
1579  
1580
